# Supplementary material for: Study protocol for a randomised controlled trial of a web-based behavioural lifestyle programme for emPOWERment in early Multiple Sclerosis (POWER@MS1)
Source: PubMed Central journal article supplement — BMJ Open. 2021 Feb 16;11(2):e041720. doi: 10.1136/bmjopen-2020-041720 (PMC7888332; doi:10.1136/bmjopen-2020-041720), 2021-02-16

## Appendix I: Process evaluation

A mixed methods approach (1) is used for the process evaluation based on standardised questionnaires and telephone interviews (see Table 2, Figure 2). Further, the outcome assessments of the main study are an important data source for the process evaluation. The process evaluation aims to clarify whether the intervention was delivered as intended (fidelity) and in which quantity (dose) the intervention was implemented (2, 3). Moreover, implementation barriers and facilitators will be explored. As shown in Table 2 and Figure 2, we will assess contextual factors, components associated with recruitment, delivery, responses and maintenance of centres and individuals (PwMS) as well as unintended consequences using different methods.

### *Sampling*

Questionnaires will be provided to all participants. Interviews will be performed with 10 to 20 with PwMS from each study group until information saturation is reached. Of the healthcare providers, up to 10 neurologists and 5 radiologists will be interviewed based on a purposeful sampling strategy, i.e. aiming for a diversity of centres in organisational structure and size.

### *Timing*

The process evaluation will be conducted in parallel to the main trial (see Table 2 for specific timing of assessments).

### *Data analysis*

First, the process evaluation and trial data will be analysed separately. Afterwards, data will be combined and used to determine post-trial interview questions. Quantitative process evaluation data (questionnaires and evaluation forms) will be analysed descriptively using SPSS (International Business Machines Corporation (IBM), Armonk, United States of America) or R (R Development Core Team) software. Subgroup analyses considering study outcomes and patient characteristics will be performed (for example, start of immunotherapy and decision type) in order to explore the impact of the intervention on different groups. Interviews will be analysed by thematic analysis (4) using MAXQDA (5).

## References:

1. Cresswell JW, Plano Clark VL. *Designing and Conducting Mixed Methods Research*. Sage Publications, Inc. 2010;2.
2. Moore GF, Audrey S, Barker M, Bond L, Bonell C, Hardeman W, et al. Process evaluation of complex interventions: Medical Research Council guidance. *Brit Med J*. 2015;350:h1258.
3. Craig P, Dieppe P, Macintyre S, Michie S, Nazareth I, Petticrew M, et al. Developing and evaluating complex interventions: the new Medical Research Council guidance. *Brit Med J*.
4. Braun V, Clarke V. What can "thematic analysis" offer health and wellbeing researchers? *International journal of qualitative studies on health and well-being*. 2014;9:26152.
5. Kuckartz U, Rädiker S. *Analyse qualitativer Daten mit MAXQDA*. Springer VS. 2019.

| <b>Overview process evaluation POWER@MS1</b> |                                                                                                                                                                               |                                                                                                                                                                                                                            |                              |
|----------------------------------------------|-------------------------------------------------------------------------------------------------------------------------------------------------------------------------------|----------------------------------------------------------------------------------------------------------------------------------------------------------------------------------------------------------------------------|------------------------------|
| <b>Domain</b>                                | <b>Objects of investigation</b>                                                                                                                                               | <b>Ascertainment/Data collection tool</b>                                                                                                                                                                                  | <b>Time point</b>            |
| <b>Context</b>                               | Context factors in Germany (health system)                                                                                                                                    | Description                                                                                                                                                                                                                | Pre-intervention             |
|                                              | Centre-specific structures and processes                                                                                                                                      | Questionnaire, interviews                                                                                                                                                                                                  | Pre-intervention             |
| <b>Recruitment of centres</b>                | Centre recruitment                                                                                                                                                            | Documentation of recruited centres, phone calls or visits in interested centres                                                                                                                                            | Pre-intervention             |
|                                              | Reason for study participation/ for non-participation (promoting factors and barriers)                                                                                        | Questionnaire (neurologists)                                                                                                                                                                                               | Pre- and during intervention |
| <b>Delivery to centres</b>                   | Delivery of information (study management) to neurologists, study nurses and radiologists (participation, reach)                                                              | Provision of study materials about the intervention programme, initiation of study centres                                                                                                                                 | Pre-intervention             |
|                                              | Delivery of the study monitoring platform access to all centres                                                                                                               | Provision of access data                                                                                                                                                                                                   | Pre-intervention             |
| <b>Response of centres</b>                   | Attitude (neurologists, study nurses and radiologists) regarding the study procedures (e.g. administration, recruitment, clinical visits, MRI frequency) and the intervention | Evaluation forms, interviews                                                                                                                                                                                               | During and post-intervention |
| <b>Maintenance of centres</b>                | Study centres: recruitment of patients                                                                                                                                        | Documentation of recruited patients, evaluation forms, interviews                                                                                                                                                          | During and post-intervention |
| <b>Recruitment of individuals</b>            | Recruitment of PwMS                                                                                                                                                           | Information video (provided online via YouTube and stakeholder websites/ social media/ network distributors/ magazines), study information leaflets, recruitment in the centres (screening lists, baseline questionnaires) | Pre-intervention             |
| <b>Delivery to individuals</b>               | <u>Intervention group</u> : delivery of the intervention to individuals (EBPI about lifestyle factors in MS combined with a complex behaviour change programme)               | Provision of access (login) data, e-mail and text message reminders, monitoring of programme usage, evaluation forms, interviews                                                                                           | During and post-intervention |

|                                                                                                                                                                                                                                                        |                                                                                                                                                                                                  |                                                                                                                                                           |                                                        |
|--------------------------------------------------------------------------------------------------------------------------------------------------------------------------------------------------------------------------------------------------------|--------------------------------------------------------------------------------------------------------------------------------------------------------------------------------------------------|-----------------------------------------------------------------------------------------------------------------------------------------------------------|--------------------------------------------------------|
|                                                                                                                                                                                                                                                        | <u>Control group</u> : delivery of the control intervention to individuals (web-based information on lifestyle factors consisting of optimised standard care material)                           | Provision of access (login) data, e-mail and text message reminders, monitoring of programme usage, evaluation forms, interviews                          | During and post-intervention                           |
| <b>Response of individuals</b>                                                                                                                                                                                                                         | E.g.: Satisfaction with the study procedures (e.g. frequency of MRIs and clinical visits) and the intervention, knowledge, attitude, empowerment, change in behaviour, barriers and facilitators | Questionnaires (primary and secondary endpoints RCT), evaluation forms, interviews                                                                        | Post-intervention, after reaching the primary endpoint |
| <b>Maintenance of individuals</b>                                                                                                                                                                                                                      | <u>PwMS</u> (users of the programme): knowledge, empowerment, change in behaviour and reasons for usage                                                                                          | Questionnaires (primary and secondary endpoints RCT), evaluation forms, interviews                                                                        | During and post-intervention                           |
|                                                                                                                                                                                                                                                        | <u>PwMS</u> (non-user of the programme): knowledge, empowerment, change in behaviour and reasons for non-usage                                                                                   | Contacting participants via e-mail or telephone, questionnaire, interviews                                                                                | During and post-intervention                           |
| <b>Unintended consequences</b>                                                                                                                                                                                                                         | <u>Patients</u> : anxiety, depression, negative impact on disease specific quality of life                                                                                                       | Evaluation form, interviews, secondary outcome measurement                                                                                                | During and post-intervention                           |
|                                                                                                                                                                                                                                                        | <u>Neurologists</u> : professional relationship to patients, barriers for implementation                                                                                                         | Evaluation form, interviews                                                                                                                               | During and post-intervention                           |
|                                                                                                                                                                                                                                                        | <u>Study nurses</u> : stress, professional relationship to patients, barriers for implementation                                                                                                 | Evaluation form, interviews                                                                                                                               | During and post-intervention                           |
| <b>Theory</b>                                                                                                                                                                                                                                          | EBPI, TDF, TPB, Empowerment                                                                                                                                                                      | Application during study planning and the development of study materials, used in evaluation forms, in the programme and in secondary outcome measurement | Pre-, during and post-intervention                     |
| EBPI = evidence-based patient information; MRI = magnetic resonance imaging; MS = Multiple Sclerosis; PwMS = Persons with Multiple Sclerosis; RCT = randomised controlled trial; TDF = Theoretical Domains Framework; TPB = Theory of Planned Behavior |                                                                                                                                                                                                  |                                                                                                                                                           |                                                        |

Table 2: Overview process evaluation POWER@MS1

Figure 2: Process evaluation POWER@MS1: questions and methods

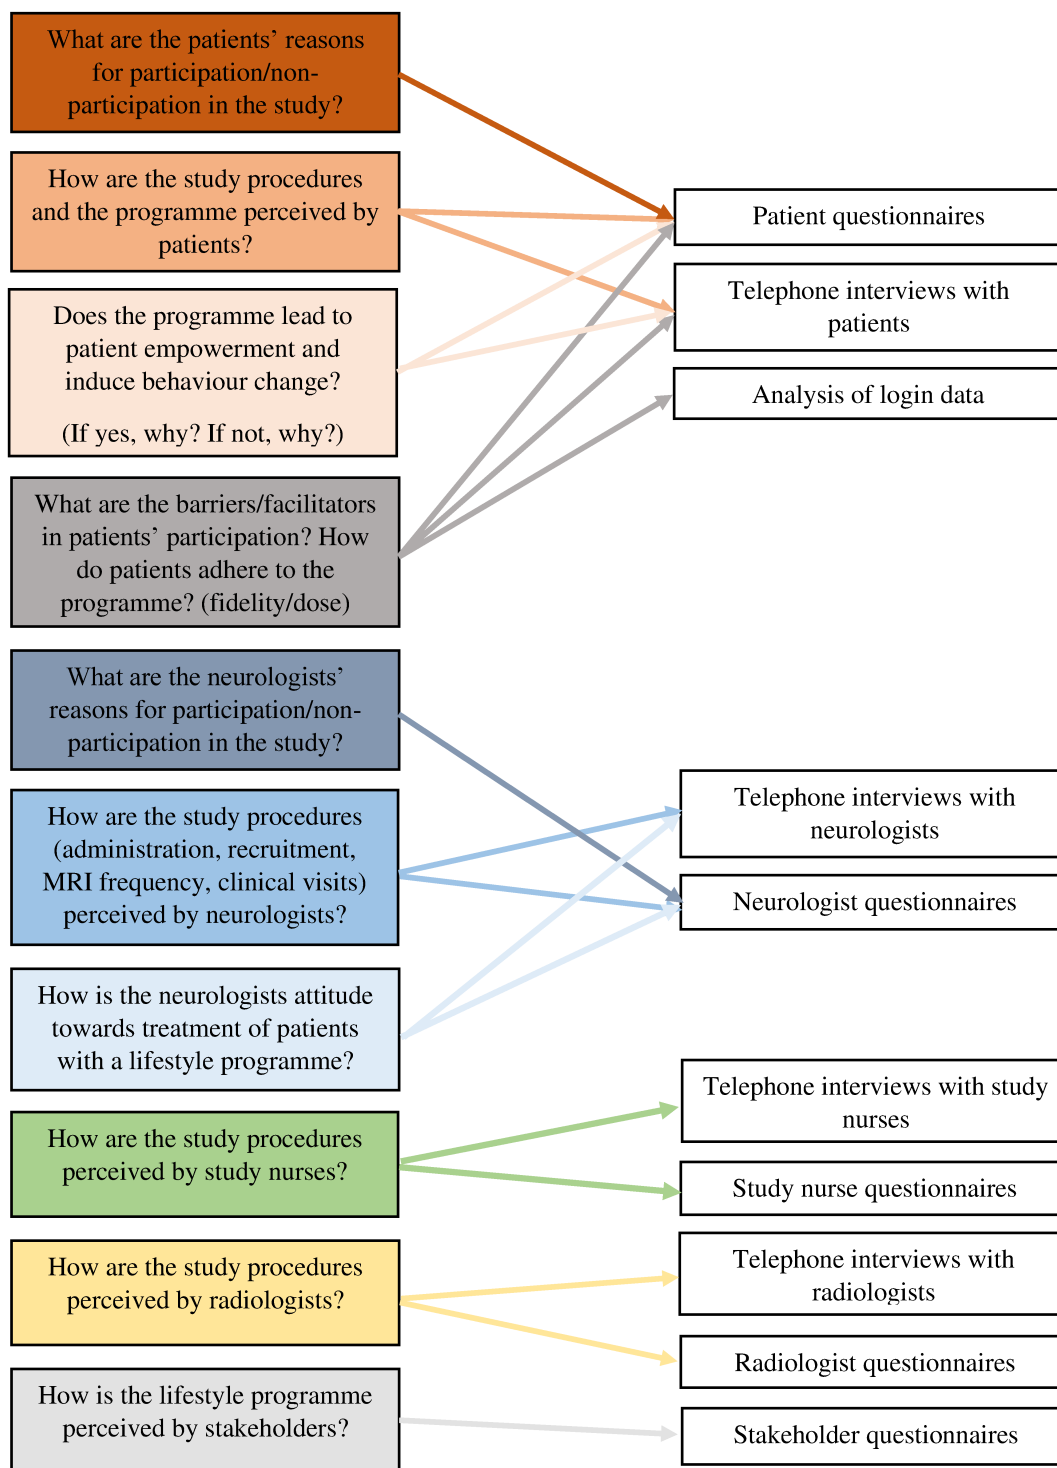

Supplement: bmjopen-2020-041720supp001.pdf [file bmjopen-2020-041720supp001.pdf]
