# Supplementary material for: Study protocol for a randomised controlled trial of a web-based behavioural lifestyle programme for emPOWERment in early Multiple Sclerosis (POWER@MS1)
Source: PubMed Central journal article supplement — BMJ Open. 2021 Feb 16;11(2):e041720. doi: 10.1136/bmjopen-2020-041720 (PMC7888332; doi:10.1136/bmjopen-2020-041720), 2021-02-16
Supplement: bmjopen-2020-041720.draft_revisions.pdf [file bmjopen-2020-041720.draft_revisions.pdf]

# BMJ Open

BMJ Open is committed to open peer review. As part of this commitment we make the peer review history of every article we publish publicly available.

When an article is published we post the peer reviewers' comments and the authors' responses online. We also post the versions of the paper that were used during peer review. These are the versions that the peer review comments apply to.

The versions of the paper that follow are the versions that were submitted during the peer review process. They are not the versions of record or the final published versions. They should not be cited or distributed as the published version of this manuscript.

BMJ Open is an open access journal and the full, final, typeset and author-corrected version of record of the manuscript is available on our site with no access controls, subscription charges or pay-per-view fees (<http://bmjopen.bmj.com>).

If you have any questions on BMJ Open's open peer review process please email [info.bmjopen@bmj.com](mailto:info.bmjopen@bmj.com)

# BMJ Open

## Study protocol for a randomised controlled trial of a web-based behavioural lifestyle programme for emPOWERment in early Multiple Sclerosis (POWER@MS1)

|                               |                                                                                                                                                                                                                                                                                                                                                                                                                                                                                                                                                                                                                                                                                                                                                                                                                                                                                                                                                                                                                                                                                                                                                                                                                                                                                                                                                                                                                                                                                                                                                                                                                                                                                                                                                                                                                                                                                                                                                                                                                                                  |
|-------------------------------|--------------------------------------------------------------------------------------------------------------------------------------------------------------------------------------------------------------------------------------------------------------------------------------------------------------------------------------------------------------------------------------------------------------------------------------------------------------------------------------------------------------------------------------------------------------------------------------------------------------------------------------------------------------------------------------------------------------------------------------------------------------------------------------------------------------------------------------------------------------------------------------------------------------------------------------------------------------------------------------------------------------------------------------------------------------------------------------------------------------------------------------------------------------------------------------------------------------------------------------------------------------------------------------------------------------------------------------------------------------------------------------------------------------------------------------------------------------------------------------------------------------------------------------------------------------------------------------------------------------------------------------------------------------------------------------------------------------------------------------------------------------------------------------------------------------------------------------------------------------------------------------------------------------------------------------------------------------------------------------------------------------------------------------------------|
| Journal:                      | <i>BMJ Open</i>                                                                                                                                                                                                                                                                                                                                                                                                                                                                                                                                                                                                                                                                                                                                                                                                                                                                                                                                                                                                                                                                                                                                                                                                                                                                                                                                                                                                                                                                                                                                                                                                                                                                                                                                                                                                                                                                                                                                                                                                                                  |
| Manuscript ID                 | bmjopen-2020-041720                                                                                                                                                                                                                                                                                                                                                                                                                                                                                                                                                                                                                                                                                                                                                                                                                                                                                                                                                                                                                                                                                                                                                                                                                                                                                                                                                                                                                                                                                                                                                                                                                                                                                                                                                                                                                                                                                                                                                                                                                              |
| Article Type:                 | Protocol                                                                                                                                                                                                                                                                                                                                                                                                                                                                                                                                                                                                                                                                                                                                                                                                                                                                                                                                                                                                                                                                                                                                                                                                                                                                                                                                                                                                                                                                                                                                                                                                                                                                                                                                                                                                                                                                                                                                                                                                                                         |
| Date Submitted by the Author: | 16-Jun-2020                                                                                                                                                                                                                                                                                                                                                                                                                                                                                                                                                                                                                                                                                                                                                                                                                                                                                                                                                                                                                                                                                                                                                                                                                                                                                                                                                                                                                                                                                                                                                                                                                                                                                                                                                                                                                                                                                                                                                                                                                                      |
| Complete List of Authors:     | <p>Krause, Nicole; Institute of Neuroimmunology and Multiple Sclerosis (INIMS), University Medical Center Hamburg-Eppendorf<br/> Riemann-Lorenz, Karin; Institute of Neuroimmunology and Multiple Sclerosis (INIMS), University Medical Center Hamburg-Eppendorf<br/> Steffen, Tanja; Institute of Neuroimmunology and Multiple Sclerosis (INIMS), University Medical Center Hamburg-Eppendorf<br/> Rahn, Anne; Institute of Neuroimmunology and Multiple Sclerosis (INIMS), University Medical Center Hamburg-Eppendorf; Department of Health Services Research, Carl von Ossietzky University Oldenburg<br/> Pöttgen, Jana; Institute of Neuroimmunology and Multiple Sclerosis (INIMS), University Medical Center Hamburg-Eppendorf; Department of Neurology, University Medical Center Hamburg-Eppendorf<br/> Stellmann, Jan-Patrick; Institute of Neuroimmunology and Multiple Sclerosis (INIMS), University Medical Center Hamburg-Eppendorf; APHM, Hopital de la Timone, CEMEREM<br/> Koepke, Sascha; Institute of Nursing Science, University of Cologne<br/> Friede, Tim; Institute for Medical Statistics, University Medical Centre Göttingen<br/> Icks, Andrea; Institute for Health Services Research and Health Economics, Heinrich Heine University Düsseldorf<br/> Vomhof, Markus; Institute for Health Services Research and Health Economics, Heinrich Heine University Düsseldorf<br/> Temmes, Herbert; Deutsche Multiple Sklerose Gesellschaft, Bundesverband e.V.<br/> van de Loo, Markus; Deutsche Multiple Sklerose Gesellschaft, Bundesverband e.V.<br/> Gold, Stefan M.; Institute of Neuroimmunology and Multiple Sclerosis (INIMS), University Medical Center Hamburg-Eppendorf; Charité Universitätsmedizin Berlin, Department of Psychiatry and Medical Department, Section Psychosomatic Medicine (CBF)<br/> Heesen, Christoph; Institute of Neuroimmunology and Multiple Sclerosis (INIMS), University Medical Center Hamburg-Eppendorf; Department of Neurology, University Medical Center Hamburg-Eppendorf</p> |
| Keywords:                     | Multiple sclerosis < NEUROLOGY, EDUCATION & TRAINING (see Medical Education & Training), PUBLIC HEALTH                                                                                                                                                                                                                                                                                                                                                                                                                                                                                                                                                                                                                                                                                                                                                                                                                                                                                                                                                                                                                                                                                                                                                                                                                                                                                                                                                                                                                                                                                                                                                                                                                                                                                                                                                                                                                                                                                                                                           |
|                               |                                                                                                                                                                                                                                                                                                                                                                                                                                                                                                                                                                                                                                                                                                                                                                                                                                                                                                                                                                                                                                                                                                                                                                                                                                                                                                                                                                                                                                                                                                                                                                                                                                                                                                                                                                                                                                                                                                                                                                                                                                                  |

1  
2  
3  
4  
5  
6  
7  
8  
9  
10  
11  
12  
13  
14  
15  
16  
17  
18  
19  
20  
21  
22  
23  
24  
25  
26  
27  
28  
29  
30  
31  
32  
33  
34  
35  
36  
37  
38  
39  
40  
41  
42  
43  
44  
45  
46  
47  
48  
49  
50  
51  
52  
53  
54  
55  
56  
57  
58  
59  
60

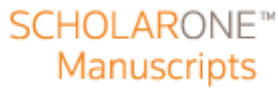

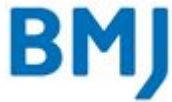

I, the Submitting Author has the right to grant and does grant on behalf of all authors of the Work (as defined in the below author licence), an exclusive licence and/or a non-exclusive licence for contributions from authors who are: i) UK Crown employees; ii) where BMJ has agreed a CC-BY licence shall apply, and/or iii) in accordance with the terms applicable for US Federal Government officers or employees acting as part of their official duties; on a worldwide, perpetual, irrevocable, royalty-free basis to BMJ Publishing Group Ltd ("BMJ") its licensees and where the relevant Journal is co-owned by BMJ to the co-owners of the Journal, to publish the Work in this journal and any other BMJ products and to exploit all rights, as set out in our [licence](#).

The Submitting Author accepts and understands that any supply made under these terms is made by BMJ to the Submitting Author unless you are acting as an employee on behalf of your employer or a postgraduate student of an affiliated institution which is paying any applicable article publishing charge ("APC") for Open Access articles. Where the Submitting Author wishes to make the Work available on an Open Access basis (and intends to pay the relevant APC), the terms of reuse of such Open Access shall be governed by a Creative Commons licence – details of these licences and which [Creative Commons](#) licence will apply to this Work are set out in our licence referred to above.

Other than as permitted in any relevant BMJ Author's Self Archiving Policies, I confirm this Work has not been accepted for publication elsewhere, is not being considered for publication elsewhere and does not duplicate material already published. I confirm all authors consent to publication of this Work and authorise the granting of this licence.

# Study protocol for a randomised controlled trial of a web-based behavioural lifestyle programme for emPOWERment in early Multiple Sclerosis (POWER@MS1)

Nicole Krause<sup>1</sup>, Karin Riemann-Lorenz<sup>1</sup>, Tanja Steffen<sup>1</sup>, Anne Christin Rahn<sup>1,2</sup>, Jana Pöttgen<sup>1,3</sup>, Jan-Patrick Stellmann<sup>1,4</sup>, Sascha Köpke<sup>5</sup>, Tim Friede<sup>6</sup>, Andrea Icks<sup>7</sup>, Markus Vomhof<sup>7</sup>, Herbert Temmes<sup>8</sup>, Markus van de Loo<sup>8</sup>, Stefan M. Gold<sup>1,9</sup> and Christoph Heesen<sup>1,3</sup>

---

## Correspondence to

Nicole Krause; Institute of Neuroimmunology and Multiple Sclerosis (INIMS), University Medical Center Hamburg-Eppendorf, Martinistraße 52, 20246 Hamburg, Germany; n.krause@uke.de

## Author affiliations

<sup>1</sup> Institute of Neuroimmunology and Multiple Sclerosis (INIMS), University Medical Center Hamburg-Eppendorf, Hamburg, Germany

<sup>2</sup> Department of Health Services Research, Carl von Ossietzky University Oldenburg, Oldenburg, Germany

<sup>3</sup> Department of Neurology, University Medical Center Hamburg-Eppendorf, Hamburg, Germany

<sup>4</sup> APHM, Hopital de la Timone, CEMEREM, Marseille, France

<sup>5</sup> Institute of Nursing Science, University of Cologne, Cologne, Germany

<sup>6</sup> Institute for Medical Statistics, University Medical Centre Göttingen, Göttingen, Germany

<sup>7</sup> Institute for Health Services Research and Health Economics, Heinrich Heine University Düsseldorf, Düsseldorf, Germany

<sup>8</sup> Deutsche Multiple Sklerose Gesellschaft, Bundesverband e.V., Hannover, Germany

<sup>9</sup> Charité Universitätsmedizin Berlin, Department of Psychiatry and Medical Department, Section Psychosomatic Medicine (CBF), Berlin, Germany

**Word count:** 3,575

**Issue date:** 15<sup>th</sup> June 2020

**Protocol amendment number:** 01

## ABSTRACT

**Introduction** Multiple sclerosis (MS) is an inflammatory and degenerative disease of the central nervous system that mainly affects young adults. Uncertainty is a major psychological burden of the disease from diagnosis to prognosis, enhanced by the pressure to make early decisions on a diverse set of immunotherapies. Watchful waiting for 1-2 years while adapting goals and lifestyle habits to life with a chronic disease represents another reasonable option for persons with MS (PwMS). A behaviour change programme based on evidence-based patient information (EBPI) is not available in standard care. This randomised controlled trial (RCT) investigates the hypothesis that such a programme can change patient behaviour and reduce inflammatory disease activity in PwMS.

**Methods and analysis** A multiphase mixed methods study will be conducted. The web-based behavioural intervention will be evaluated and revised in a feasibility and pilot phase with experts and PwMS. The intervention will be evaluated in a RCT aiming to recruit 328 patients with clinically isolated syndrome (CIS), suspected MS or confirmed MS for less than one year, who have not yet started immunotherapy. Moreover, a mixed-methods process evaluation and a health economic evaluation will be carried out. Participants will be recruited in at least 16 MS centres across Germany and randomised to an intervention group with 12 months of access to EBPI about lifestyle factors in MS, combined with a complex behaviour change programme, or to a control group (optimised standard care). The combined primary endpoint is the incidence of new T2 lesions on magnetic resonance imaging or confirmed relapses.

**Ethics and dissemination** The study has been approved by the Ethics Committee of the Hamburg Medical Council (PV6015) and all relevant local ethics boards. It was prospectively registered at ClinicalTrials.gov (NCT03968172).

**Keywords** Multiple sclerosis, Complex intervention, Lifestyle intervention, Randomised controlled trial, Evidence-based medicine

### Strengths and limitations of this study

- Patients are actively involved in the development process of the intervention group programme in order to address the complex needs of newly diagnosed PwMS.
- This study has the chance to show that lifestyle interventions can influence molecular processes in an immunological disease, which could considerably strengthen the importance of lifestyle management in healthcare.
- The intervention does not include personal consultation, which may limit the extent and sustainability of changes in lifestyle habits.

---

## INTRODUCTION

Multiple Sclerosis (MS) is an inflammatory and degenerative disease of the central nervous system (CNS) that affects about 240,000 people in Germany, typically first diagnosed during early adulthood (1). Over the past decade, new diagnostic criteria (2) enabled earlier diagnosis of the disease and magnetic resonance imaging (MRI) has become a crucial diagnostic and prognostic instrument. Moreover, MRI is used for the evaluation of treatment success despite considerable limitations (3). However, there is still no highly specific diagnostic marker and diagnosis may remain unclear for years. In addition, reliable prognosis remains difficult and it

1  
2  
3 is hardly possible to estimate the long-term expected disability, especially when based on  
4 disease development during the first 1-2 years after onset. For this reason, diagnostic  
5 information about MS is often experienced as traumatising and can cause disappointment and  
6 distrust in the medical system at an early stage (4). Although available immunotherapies reduce  
7 relapse rates, the long-term benefit on disability progression remains unclear (5, 6).  
8 Nevertheless, early therapy directly after MS diagnosis is recommended (7), while adherence  
9 to immunotherapy in the first two years may be as low as 30-50% (8). These manifold  
10 uncertainties and the resulting psychological stress may have a negative effect on MS disease  
11 activity (9).  
12  
13

14  
15 Surveys have shown that PwMS are a patient group that frequently uses internet sources to  
16 gather information (10). However, these sources often provide contradictory and poorly curated  
17 advice on lifestyle-related matters (11). The existing care structures cannot meet the complex  
18 information needs of PwMS, although the potential of stress management and lifestyle  
19 measures, especially exercise and nutrition, in neurodegenerative diseases as MS is high (12,  
20 13). Rigorous studies are largely missing and systematic, evidence-based patient information  
21 about lifestyle factors in MS combined with a behaviour change programme is not available.  
22 Training and empowerment interventions in MS have so far mainly been studied in face-to-face  
23 or group programmes (14). Online interventions in MS have mainly been investigated for the  
24 management of symptoms such as depression and fatigue (15, 16). POWER@MS1 aims to  
25 encourage patients with MS to find the best way of dealing with the disease on the basis of  
26 evidence-based patient information (EBPI) and a complex behaviour change intervention. The  
27 goal of this programme is a more targeted immunotherapy initiation, and consequently, better  
28 adherence and optimisation of lifestyle habits.  
29  
30  
31  
32

### 33 **Objectives**

34  
35 This study investigates the hypothesis that EBPI about lifestyle factors in MS combined with a  
36 complex behaviour change programme (EBBC programme) can reduce inflammatory disease  
37 activity in MS and change patient behaviour.  
38

#### 39 *Primary objective*

40  
41 To determine if the EBBC programme can reduce inflammatory disease activity in MS as  
42 measured clinically by relapses or by new T2 lesions on MRI.  
43

#### 44 *Secondary objectives*

45  
46 The secondary objectives are to determine if the EBBC programme can

- 47 • strengthen patient autonomy and empowerment,
  - 48 • promote informed decisions on immunotherapy,
  - 49 • improve quality of life,
  - 50 • reduce anxiety and depression,
  - 51 • increase physical activity and a healthy dietary behaviour,
  - 52 • increase effectiveness of neurologist consultations,
  - 53 • fit with users and contextual factors,
  - 54 • and save health care costs.
- 55  
56  
57  
58

## 59 **METHODS AND ANALYSIS**

### 60 **Study design**

1  
2  
3 A 'multiphase-mixed-methods-study' covering the first three phases of the Medical Research  
4 Council (MRC) Framework for the development and evaluation of complex interventions (17)  
5 will be conducted:  
6

7  
8 1. Development: A web-based behavioural intervention programme will be adapted and  
9 designed as a highly individualized system based on simulated dialogues. This programme will  
10 provide MS patients with EBPI partly based on previous work of the research team (13). In  
11 addition, a web-based control group programme will be developed based on information  
12 material available from the German Multiple Sclerosis Society (DMSG).  
13

14  
15 2. Feasibility: Feasibility testing involves several aspects, such as examination of practicability  
16 and acceptance. At an early stage of development, the intervention programme will be presented  
17 to expert PwMS and evaluated using qualitative methods (think-aloud, teach-back) and closed  
18 questions. Subsequently, it will be presented to and discussed with medical MS experts in a  
19 pre-test phase. The outcome instruments as well as the tool will then be piloted with PwMS in  
20 order to assess comprehensibility, user-friendliness and acceptance, followed by a final revision  
21 of the programme.  
22

23  
24 3. Evaluation: The intervention will be evaluated in a superiority, rater-blinded, randomised  
25 controlled, parallel group trial. Study participants will be randomised to the intervention group  
26 (IG) with access to the EBBC programme in addition to standard of care or to the control group  
27 (CG) with optimised standard care using an allocation ratio of 1:1. In addition, a mixed-methods  
28 process evaluation (see Appendix I) and a health economic evaluation will be carried out.  
29

### 30 **Study setting**

31  
32 Recruitment and neurological encounters will take place in community clinics, private  
33 practises, and academic hospitals with a specialisation in MS across Germany.  
34

### 35 **Eligibility criteria**

36  
37 Patients aged between 18 and 65 years with CIS, suspected or confirmed MS for less than 12  
38 months, who signed informed consent, will be included. Furthermore, they must have at least  
39 two MS-typical lesions on T2-weighted images on MRI scans and an MS typical cerebrospinal  
40 fluid finding with detection of oligoclonal bands. Internet access is mandatory for participation.  
41 Patients who are not able to provide informed consent or have a substantial psychiatric disorder  
42 or substantial cognitive deficit based on clinical impression will be excluded. Patients who have  
43 been treated with glatiramer acetate, teriflunomide, dimethylfumarate or interferons within the  
44 last six months prior to study inclusion or have received corticosteroid therapy within 4 weeks  
45 prior to study inclusion will also be excluded. Patients with a planned treatment start within  
46 three months after inclusion or patients who had received any other MS-specific  
47 immunotherapy at any time in the past will not be eligible. Pregnancy and claustrophobia are  
48 also exclusion criteria.  
49

### 50 **Interventions**

51  
52 Eligible patients will be randomised to the IG programme or the CG programme. Both  
53 programmes will be offered online on the same platform with a similar design.  
54

55  
56 *Intervention group (IG): EBBC programme*  
57  
58  
59  
60



1  
2  
3 The IG programme is an MS-specific adaptation of the earlier developed “Optimmune®” tool  
4 by GAIA (<https://gaia-group.com/en/>). Based on current research and theory of the field (18-  
5 20), it was developed for lifestyle management in cancer patients based on empowerment (21)  
6 and cognitive behavioural therapy (CBT) approaches, including acceptance and mindfulness  
7 oriented techniques (22-24). Furthermore, EBPI, autonomy supportive intervention concepts  
8 based on self-determination theory (25), the principles of responsiveness (26) and individual  
9 content-tailoring (27, 28) are crucial components of the intervention format. The programme  
10 specifically attempts to avoid fear appeals and simple information provision (e.g. ‘lecturing’).  
11

12  
13 The system is based on the AI-based software platform broca®, which is the basis for several  
14 effective therapy support systems evaluated in earlier RCTs, e.g. (15, 22, 29-31). An optional  
15 email and SMS reminder system aims to enhance involvement. Usage of the IG programme  
16 will be monitored and reacted on to ensure patient adherence.  
17

18  
19 Disease management and lifestyle techniques as well as exercises will be taught in sequentially  
20 active interactive learning units (“simulated dialogues”) focusing on the following topics:  
21

- 22 1. Diagnosis, prognosis and immunotherapy decision making
- 23 2. Support in coping
- 24 3. Techniques for coping with stress / depressive symptoms and developing positive emotions
- 25 4. Optimisation of dietary behaviour
- 26 5. Optimisation of physical activity behaviour
- 27 6. Sleep hygiene and methods for dealing with insomnia

28  
29 Altogether, the IG programme will consist of 16 modules and accompany each patient over a  
30 period of 12 months with initial 2-3 weekly modules, later only weekly reminders and modules  
31 every 2 weeks and booster sessions in the end.  
32

33  
34 *Control group (CG): Information from self-help societies*

35  
36 CG participants will receive access to an information platform with optimised standard care  
37 consisting of information compiled from DMSG information material to reflect current  
38 practice. It will also accompany participants over a period of 12 months and cover similar topics  
39 as in the IG. A reminder function as well as usage monitoring and adherence promotion will be  
40 applied as in the IG.  
41

### 42 **Patient and public involvement**

43  
44 Patients were involved in the development phase of the intervention and also participated in the  
45 feasibility and piloting testing of the IG programme (see “Study design”).  
46

### 47 **Criteria for discontinuation and relevant concomitant care**

48  
49 In case of new events (relapse or T2 lesion), formally the primary endpoint will be reached.  
50 However, study participants will be asked to stay in the study. Immunotherapy may be started  
51 during the trial period.  
52

### 53 **Outcomes**

54  
55 Data will be collected over a period of 12 months, with a flexible follow-up of up to 24 months  
56 in early recruited patients. A list of outcomes including measurement time points is provided in  
57 Table 1.  
58  
59  
60

| Instrument                 | Measurement time points |       |       |       |       |       |         |         |       |
|----------------------------|-------------------------|-------|-------|-------|-------|-------|---------|---------|-------|
|                            | $t_{-1}$                | $t_0$ | $V_1$ | $V_2$ | $V_3$ | $V_4$ | $V_5^*$ | $V_6^*$ | $t_x$ |
| Month                      | -1                      | 0     | 1     | 3     | 6     | 12    | 18*     | 24*     | X     |
| Eligibility screen         | X                       |       |       |       |       |       |         |         |       |
| Informed consent           | X                       |       |       |       |       |       |         |         |       |
| Demographic data           | X                       |       |       |       |       |       |         |         |       |
| MRI                        |                         | X     |       | X     | X     | X     | X       | X       |       |
| Clinical visit             |                         | X     | X     | X     | X     | X     | X       | X       |       |
| Relapse history            |                         | X     | X     | X     | X     | X     | X       | X       | X     |
| Immunotherapy status       |                         | X     | X     | X     | X     | X     | X       | X       | X     |
| EDSS                       |                         | X     |       |       |       | X     |         |         |       |
| RIKNO10                    |                         |       |       | X     |       |       |         |         |       |
| CPS                        |                         |       |       |       |       | X     |         |         | X     |
| Decision satisfaction      |                         |       |       |       |       |       |         |         | X     |
| Patient activation         |                         | X     |       |       |       | X     |         |         |       |
| Emotional coping           |                         | X     |       |       |       | X     |         |         |       |
| Changes in empowerment     |                         |       |       |       |       | X     |         |         |       |
| Expectancy                 |                         |       | X     |       |       |       |         |         |       |
| Readiness to change        |                         | X     |       | X     |       | X     |         |         |       |
| HAQUAMS                    |                         | X     |       |       |       | X     |         |         |       |
| EQ-5D-5L                   |                         | X     |       |       | X     | X     | X       | X       |       |
| HADS                       |                         | X     |       |       |       | X     |         |         |       |
| GLTEQ                      |                         | X     |       |       |       | X     |         |         |       |
| BSA                        |                         | X     |       |       |       | X     |         |         |       |
| QHOD2                      |                         | X     |       | X     |       | X     |         |         |       |
| myfood24                   |                         | X     |       |       |       | X     |         |         |       |
| Process evaluation         | X                       | X     | X     | X     | X     | X     | X       | X       |       |
| Health economic parameters |                         | X     |       |       | X     | X     | X       | X       |       |

$t_{-1}$  = before enrolment;  $t_0$  = before allocation;  $V_1 - V_6$  = post allocation ( $V_1$  = Visit in month 1;  $V_2$  = Visit in month 3;  $V_3$  = Visit in month 6;  $V_4$  = Visit in month 12;  $V_5$  = Visit in month 18;  $V_6$  = Visit in month 24); \* = only in early recruited patients;  $t_x$  = after reaching the primary endpoint.

BSA: Bewegungs- und Sportaktivität Fragebogen (Physical Activity, Exercise, and Sport Questionnaire); CPS: Control Preference Scale; EDSS: Expanded Disability Status Scale; GLTEQ: Godin Leisure-Time Exercise Questionnaire; HADS: Hospital Anxiety and Depression Scale; HAPA: Health Action Process Approach; HAQUAMS: Hamburg Quality of Life in MS Scale; MRI: Magnetic Resonance Imaging; QHOD2: Questionnaire of Healthy Diet; RIKNO: Risk Knowledge in Relapsing Multiple Sclerosis.

Table 1: Assessments and measurement time points

*Primary outcome*

The primary endpoint is the time to a new relapse or, as a surrogate for inflammatory disease activity, a new lesion on T2-weighted images on MRI scans, whatever first occurs. Occurrence of new T2 lesions will be assessed according to an MRI protocol (Localizer, 3D FLAIR sagittal e.g. 3x3mm, 3D image T1w native sagittal, 1-3mm, PD/T2w axial 3mm, protocol duration approx. 20 min.). MRI scans will be read centrally by an experienced rater, blinded to subject identity and group assignment.

Relapses will be clinically evaluated by participating neurologists. In case of a relapse, duration of complaints/impairment, relapse symptoms (worsened or newly occurred), degree of impairment due to the relapse and the degree of certainty with regard to the classification of the worsening as a relapse will be assessed.

*Secondary outcomes*

To assess risk knowledge, an abbreviated 10-item version of the MS risk knowledge questionnaire (RIKNO 2.0 (32)) will be used.

As a surrogate of decision quality, preferred and realized role preference in decision discussions for or against immunotherapy based on the Control Preference Scale (CPS) (33) will be assessed. Immunotherapy status will be assessed to determine whether an immunotherapy was newly started, aborted or changed.

The extent of patient activation (i.e. expressed in the confidence and knowledge to take action, as well as actually taking health-related action) based on the Patient Activation Measure, PAM (34) and the coping capability, based on selected items of the coping self-efficacy scale, CSES (35) will be measured. In addition, patient expectancies based on the credibility/expectancy questionnaire (36) will be assessed. Based on selected items of the Health Action Process Approach, HAPA (37), readiness to change will be estimated in order to determine the interventions impact on willingness to change lifestyle habits. Moreover, changes in perceived empowerment (based on (38), selected items) will be measured.

Impairment in the Expanded Disability Status Scale (EDSS) (39) will be determined by the treating neurologist.

Ideally, the lifestyle intervention leads to more general satisfaction with life but may also alleviate symptoms such as depression, anxiety, fatigue. Quality of life will be measured with the Hamburg Quality of Life in MS Scale, HAQUAMS (40) and the generic EQ-5D-5L (41). The Hospital anxiety and distress scale, HADS (42) will be used as a measures for depression and anxiety.

Physical activity behaviour will be measured with the Godin Leisure-Time Exercise Questionnaire (GLTEQ) (43) and the Physical Activity, Exercise, and Sport Questionnaire (Bewegungs- und Sportaktivität (BSA)) (44).

The Questionnaire of Healthy Diet (QHOD2), an adapted version of the Mediterranean Diet Screener (aMDS) as used in (45) that was developed by the German Institute of Human Nutrition (DIfE), will be used to measure the frequency of intake of characteristic food groups

1  
2  
3 in the last seven days. To provide nutrient intake data, the 24-h dietary recall myfood24 (46)  
4 will be used, in each case three times within a time period of two to three weeks (two weekdays,  
5 one weekend day).  
6

### 7 *Health economic outcomes*

8  
9 Health economic parameters will be assessed to determine the efficiency of the intervention by  
10 comparing the cost and outcome of the IG to the CG. All direct costs associated with the  
11 intervention as well as costs resulting from the consumption of health-related goods and  
12 services (47) and indirect costs due to productivity losses will be considered from the  
13 perspective of the German statutory health insurance and the society.

14  
15 To determine efficiency of the intervention, a cost-effectiveness analysis will be performed in  
16 terms of additional costs per additional relapse or T2 lesion (clinical endpoint) averted and a  
17 cost-utility analysis, which aims to calculate the additional costs required for an additional  
18 improvement in quality-adjusted life years (QALYs). Incremental cost-effectiveness ratio and  
19 incremental cost-utility ratio will be calculated as the ratio of the difference in mean costs and  
20 difference in mean outcomes between IG and CG. QALYs will be measured by a well-  
21 established preference based quality of life instrument (EQ-5D-5L) and evaluated by a German  
22 tariff to generate utilities (41). A standardised instrument (48) will be used to record the  
23 healthcare consumption of study participants focusing mainly on outpatient doctor visits, visits  
24 to other health service providers, sick days, hospital stays and MS immune medication.  
25 Productivity losses will be estimated using the human capital approach (49). 95% confidence  
26 intervals for the outcome of the analyses will be determined non-parametrically based on the  
27 distribution characteristics of costs using bootstrap procedures (50). Univariate and  
28 probabilistic sensitivity analyses will be performed and cost-effectiveness acceptance curves  
29 will be executed to take into account uncertainty (51).  
30  
31  
32  
33  
34

### 35 **Participant timeline**

36 The time schedule is depicted in Figure 1.

37  
38 *Figure 1: Participant timeline*

### 39 **Sample size**

40  
41  
42 Based on effect sizes resulting from an RCT for a stress management intervention (13) as well  
43 as data from cohorts on lesion development after an initial clinical event ((52), personal  
44 communication Michael Scheel, Charité Berlin), one event (relapse or at least one new T2  
45 lesion) is expected in every second patient within 12 months in the CG. 100 events result in a  
46 statistical power of 85% for a two-way significance level test of 5% and an assumed hazard  
47 ratio of 0.55, i.e. a reduction of 45% by IG compared to the CG. Thus, with a mean observation  
48 time of 12 months, the 100 events required can be expected to be observed in 262 patients (131  
49 per group). Assuming about 20% dropouts over one year, 328 patients will be randomised (164  
50 per group, 20% dropout = 33 = 131 per group). A sample size recalculation will be performed  
51 after 12 months to review the assumptions on event rates and dropouts (53). If necessary, the  
52 number of cases will be increased to a maximum of 450 patients.  
53  
54  
55  
56

### 57 **Recruitment**

58 Eligible MS centres will be recruited by the coordinating centre in Hamburg (University  
59 Medical Center Hamburg-Eppendorf, UKE). Recruitment and inclusion of MS patients will  
60

1  
2  
3 take place in the participating MS centres through neurologists. In addition, POWER@MS1  
4 will be advertised on the website of the DMSG. Overall, a recruitment period of 12 months is  
5 assumed with approx. 20 patients per centre, with one to two patients per month. Reasons for  
6 rejection will be documented.  
7

### 8 **Allocation**

9  
10 Group assignment will be undertaken externally and in a concealed manner through the  
11 electronic data capture system secuTrial® to prevent any manipulation of persons involved in  
12 the study. Eligible study participants will be randomised into the IG or to the CG in blocks (1:1  
13 allocation ratio) through a computer-generated system in secuTrial®. After baseline  
14 documentation and subsequent randomisation, patients will be provided with access (login)  
15 details to the IG or CG programme by an unblinded member of the study team.  
16  
17

### 18 **Blinding**

19  
20 The study will be conducted as an investigator blinded trial and participating MS centres will  
21 not be provided with any information about group assignment of a given patient. Blinding of  
22 the trial participants is pursued, but only possible to a limited extent. Participants and  
23 neurologists might realize their participation in the IG during encounters.  
24  
25

### 26 **Data collection methods**

27  
28 Data will be obtained at different time points using paper-based and web-based questionnaires  
29 (see Table 1). In case of missing data, participants will be contacted by a member of the UKE.  
30 All study relevant data will be entered into secuTrial® and provided online. Results of MRI  
31 scans (image data) will be saved on CD and sent to the study centre by mail. They will be  
32 quality-checked, pseudonymised and uploaded in a protected reading centre database. Data  
33 obtained with regard to nutrition behaviour will be collected via secured online-platforms of  
34 the Humanstudienzentrum of the DiE and Dietary Assessment Limited (University of Leeds  
35 spinout company), which act in accordance with EU General Data Protection Regulation  
36 (Datenschutz-Grundverordnung, DSGVO). Data obtained through myfood24 will be stored on  
37 a server in the Netherlands, with a backup in the UK. After data collection, data will be  
38 transferred to secuTrial® and connected with the existing datasets. In addition, usage of the  
39 web-based programmes will be monitored.  
40  
41  
42

### 43 **Data management**

44  
45 The IG and CG programme will be provided via a secure online platform that meets all legal  
46 requirements (SSL Encryption). All study data will be used and evaluated pseudonymously.  
47 However, all participating MS centres will have a list with names and assigned pseudonyms.  
48 All electronic and paper-based data material will be stored at the UKE for a maximum period  
49 of ten years and will be destroyed subsequently. Stored CDs containing MRI images will be  
50 destroyed directly after analysis of the study data. In case of withdrawn consent, pseudonymised  
51 data will be anonymised. A deletion of already anonymized data is not possible.  
52  
53  
54

### 55 **Statistical methods**

56  
57 The effect on the primary endpoint will be estimated in a Cox proportional hazards regression  
58 that, in addition to treatment, also includes study centre as a factor; it will be reported as hazard  
59 ratio (HR) with 95% confidence interval and p-value testing the null hypothesis H0: HR=1.  
60

1  
2  
3 Kaplan-Meier curves of the primary endpoint for both groups will be used to illustrate the  
4 treatment effect.  
5

6 Secondary endpoints will be analysed using mean comparisons between IG and CG with  
7 adjustment for the baseline assessments and centre in analysis of covariance (ANCOVA)  
8 models. Least squares group differences will be reported with 95% confidence intervals and p-  
9 values testing the null hypothesis of no intervention effect. The number of portions/day or week  
10 for different food groups will be analysed, evaluated and compared to current  
11 recommendations. Data obtained through the 24h recall (myfood24) will be used to analyse  
12 intake of selected nutrients of interest comparing mean changes in intake from baseline to post  
13 intervention between IG and CG, adjusting for baseline intake. MRI lesion counts will be  
14 analysed using negative binomial regression models adjusting for baseline MRI and centre.  
15 Adverse events will be summarized as frequencies and percentages by treatment group.  
16  
17  
18

19 In addition, subgroup and moderator variable analysis is planned to be performed (e.g. early  
20 therapy vs no therapy and women vs men).  
21

22 Reasons for study withdrawal will be reported. In case of missing data, all patients will be  
23 analysed in the group they were randomised to (intention-to-treat analysis). Early study  
24 discontinuations will be treated as independent right censoring in the primary analysis. In case  
25 of substantial or differential study discontinuations, the validity of the independent censoring  
26 assumption will be explored in shared random effects models of the primary endpoint and time  
27 to study discontinuation. To handle missing data in baseline variables or follow-up assessments,  
28 multiple imputation models will be applied.  
29  
30  
31

32 All details of the statistical analyses including definitions of analysis populations will be  
33 prespecified in a statistical analysis plan.  
34

### 35 **Monitoring**

36  
37 As part of a risk-based quality management, external independent data monitoring including  
38 onsite visits at the UKE and remote data checks in secuTrial® will be performed by the contract  
39 research organization CTC North GmbH & Co. KG.  
40

### 41 **Safety and adverse events**

42  
43 As no significant harms (side effects, risks or complications) are to be expected, no stopping  
44 guidelines are planned. The performance of six MRIs over two years is close to clinical standard  
45 and can be regarded as harmless. Contrast media will not be used in order to minimize the risk  
46 of possible contrast media deposition in the basal ganglia, although no information on  
47 depositions is available for the contrast media currently used (54). No auditing trials are planned  
48 or expected.  
49  
50

## 51 **ETHICS AND DISSEMINATION**

52  
53 Informed consent will be obtained by the participating MS centres and sent to the study centre  
54 by fax. Participants may withdraw their consent at any time. In case of reaching the primary  
55 endpoint, patients are requested to remain in the study and continued access to the web tools  
56 will be guaranteed until the study end. Only the study team (investigators) and Alexander  
57 Stahmann (medical information scientist at the German MS Registry) will have access to the  
58 final trial dataset. For publications, an anonymized data set will be used. If possible, an  
59  
60

1  
2  
3 anonymized data set will be made available in the publication process in order to disseminate  
4 the study results.  
5

6 Trial results will be communicated at scientific conferences and meetings (e.g. at the yearly  
7 German Neurologists Society, the RIMS network) by the investigators and presented on the  
8 DMSG website and other relevant patient websites. Authorship will be shared between persons  
9 involved in the study following the current guidelines of the International Committee of  
10 Medical Journal Editors (ICMJE). Professional writers and persons not directly involved in the  
11 study will not be granted authorship.  
12  
13

## 14 CONCLUSION

15  
16 This will be the first study assessing the impact of a lifestyle management programme combined  
17 with EBPI on inflammatory activity in MS. If successful, POWER@MS1 has a groundbreaking  
18 potential to change guidelines on MS care enabling lifestyle management a firm place as active  
19 MS treatment.  
20  
21

### 22 Current trial status

23  
24 Patient recruitment has started in July 2019.  
25

26 **Abbreviations** aMDS: adapted Mediterranean Diet Screener; BSA: Bewegungs- und  
27 Sportaktivität Fragebogen (Physical Activity, Exercise, and Sport Questionnaire); CBT:  
28 cognitive behavioural therapy; CG: control group; CIS: clinically isolated syndrome; CNS:  
29 central nervous system; CPS: Control Preference Scale; CSES: Coping Self-efficacy Scale;  
30 DiFe: Deutsches Institut für Ernährungsforschung (German Institute of Human Nutrition);  
31 DMSG: Deutsche Multiple Sklerose Gesellschaft (German Multiple Sclerosis Society);  
32 DSGVO: Datenschutz-Grundverordnung; EBBC: evidence-based behaviour change; EBPI:  
33 evidence-based patient information; EDSS: Expanded-Disability-Status-Scale; GLTEQ: Godin  
34 Leisure-Time Exercise Questionnaire; HADS: Hospital Anxiety and Depression Scale; HAPA:  
35 Health Action Process Approach; HAQUAMS: Hamburg Quality of Life in MS Scale; ICER:  
36 incremental cost-effectiveness ratio; HR: hazard ratio; ICMJE: International Committee of  
37 Medical Journal Editors; ICUR: incremental cost-utility ratio; IG: intervention group; MRC:  
38 Medical Research Council; MRI: magnetic resonance imaging; MS: multiple sclerosis; PAM:  
39 Patient Activation Measure; QALY: quality-adjusted life year; PwMS: persons with multiple  
40 sclerosis; RCT: randomised controlled trial; UKE: Universitätsklinikum Hamburg-Eppendorf  
41 (University Medical Center Hamburg-Eppendorf)  
42  
43  
44  
45

46 **Contributors** CH is the principal investigator and led the planning and development of the full  
47 study with support from NK, KRL, TS, AR, JP, JS, SK, TF, SMG and HT. NK and CH wrote  
48 the first draft of the paper. TF specifically revised the statistical analyses sections of this paper.  
49 AI provided health economic expertise. MVDL contributed as a patient expert. All authors  
50 conceived the study, revised the manuscript for relevant scientific content, and approved the  
51 final version.  
52  
53

54 **Funding** This investigator initiated study is publicly funded by the Innovationsfonds,  
55 Innovationsausschuss beim Gemeinsamen Bundesausschuss, Wegelystraße 8, 10623 Berlin,  
56 Germany (01VSF17015). The funding body is not involved in any study related aspect.  
57  
58

59 **Competing interests** CH has received research grants, speaker honoraria and travel grants from  
60 Biogen, Celgene, Genzyme, Merck, Roche. JPS receives research funding from Deutsche

1  
2  
3 Forschungsgemeinschaft and reports grants from Biogen and Genzyme outside the submitted  
4 work. TF reports personnel fees from Bayer, BiosenseWebster, Boehringer Ingelheim, CSL  
5 Behring, Daiichi Sankyo, Enanta, Fresenius Kabi, Galapagos, Immunic, Janssen, LivaNova,  
6 Novartis, Relaxera, Roche, and Vifor; all outside this work.  
7

8  
9 **Patient consent** Not required.

10  
11 **Ethics approval and trial registration** The study has been approved by the Ethics Committee  
12 of the Hamburg Medical Council (PV6015) and all relevant local ethics boards. The trial was  
13 prospectively registered at Clinicaltrials.gov (NCT03968172). Important and major protocol  
14 modifications and amendments will have to be approved and reported to all relevant ethical  
15 committees. In addition, all changes will be noted in the study registration.  
16

17  
18 **Provenance and peer review** Not commissioned; externally peer reviewed.

19  
20 **Open Access** This is an Open Access article distributed in accordance with the Creative  
21 Commons Attribution Non Commercial (CC BY-NC 4.0) license, which permits others to  
22 distribute, remix, adapt, build upon this work non-commercially, and license their derivative  
23 works on different terms, provided the original work is properly cited and the use is non-  
24 commercial. See: <http://creativecommons.org/licenses/by-nc/4.0/>  
25  
26  
27  
28  
29  
30  
31  
32  
33  
34  
35  
36  
37  
38  
39  
40  
41  
42  
43  
44  
45  
46  
47  
48  
49  
50  
51  
52  
53  
54  
55  
56  
57  
58  
59  
60



## REFERENCES

1. Petersen G, Wittmann R, Arndt V, Gopffarth D. [Epidemiology of multiple sclerosis in Germany: regional differences and drug prescription in the claims data of the statutory health insurance]. *Nervenarzt*. 2014;85(8):990-8.
2. Thompson AJ, Banwell BL, Barkhof F, Carroll WM, Coetzee T, Comi G, et al. Diagnosis of multiple sclerosis: 2017 revisions of the McDonald criteria. *Lancet Neurol*. 2018;17(2):162-73.
3. Rahn AC, Köpke S, Schiffmann I, Stellmann JP, Mühlhauser I, Lukas C, et al. Magnetic resonance imaging as a prognostic disability marker in clinically isolated syndromes: A systematic review. *Acta Neurologica Scandinavica*. 2018;139(2).
4. Chalfant AM, Bryant RA, Fulcher G. Posttraumatic stress disorder following diagnosis of multiple sclerosis. *Journal of traumatic stress*. 2004;17(5):423-8.
5. Tramacere I, Del Giovane C, Salanti G, D'Amico R, Filippini G. Immunomodulators and immunosuppressants for relapsing-remitting multiple sclerosis: a network meta-analysis. *Cochrane Database Syst Rev*. 2015(9):Cd011381.
6. Filippini G, Del Giovane C, Clerico M, Beiki O, Mattoscio M, Piazza F, et al. Treatment with disease-modifying drugs for people with a first clinical attack suggestive of multiple sclerosis. *Cochrane Database Syst Rev*. 2017;4:Cd012200.
7. Gold R. Diagnose und Therapie der Multiplen Sklerose: Deutsche Gesellschaft für Neurologie; 2015 [Available from: <https://www.dgn.org/leitlinien/2333-II-31-2012-diagnose-und-therapie-der-multiplen-sklerose>].
8. Hansen K, Schüssel K, Kieble M, Werning J, Schulz M, Friis R, et al. Adherence to Disease Modifying Drugs among Patients with Multiple Sclerosis in Germany: A Retrospective Cohort Study. *PloS one*. 2015;10(7):e0133279.
9. Artemiades AK, Anagnostouli MC, Alexopoulos EC. Stress as a risk factor for multiple sclerosis onset or relapse: a systematic review. *Neuroepidemiology*. 2011;36(2):162-73.
10. Marrie RA, Leung S, Tyry T, Cutter GR, Fox R, Salter A. Use of eHealth and mHealth technology by persons with multiple sclerosis. *Mult Scler Relat Disord*. 2018;27:13-9.
11. Beckett JM, Bird ML, Pittaway JK, Ahuja KD. Diet and Multiple Sclerosis: Scoping Review of Web-Based Recommendations. *Interact J Med Res*. 2019;8(1).
12. Ngandu T, Lehtisalo J, Solomon A, Levälähti E, Ahtiluoto S, Antikainen R, et al. A 2 year multidomain intervention of diet, exercise, cognitive training, and vascular risk monitoring versus control to prevent cognitive decline in at-risk elderly people (FINGER): a randomised controlled trial. *The Lancet*. 2015;385(9984):2255-63.
13. Mohr DC, Lovera J, Brown T, Cohen B, Neylan T, Henry R, et al. A randomized trial of stress management for the prevention of new brain lesions in MS. *Neurology*. 2012;79(5):412-9.
14. Köpke S, al. e. Information provision for people with multiple sclerosis. *Cochrane Database of Systematic Reviews*. 2018;10(9).
15. Fischer A, Schroder J, Vettorazzi E, Wolf OT, Pottgen J, Lau S, et al. An online programme to reduce depression in patients with multiple sclerosis: a randomised controlled trial. *Lancet Psychiatry*. 2015;2(3):217-23.
16. Pöttgen J, Lau S, Penner I, Heesen C, Moritz S. Managing Neuropsychological Impairment in Multiple Sclerosis. *International Journal of MS Care*. 2015;17(3):130-7.
17. Craig P, Dieppe P, Macintyre S, Michie S, Nazareth I, Petticrew M. Developing and evaluating complex interventions: the new Medical Research Council guidance. *Int J Nurs Stud*. 2013;50(5):587-92.
18. Michie S, Van Stralen MM, West R. The behaviour change wheel: A new method for characterising and designing behaviour change interventions. *Implement Sci*. 2011;6:42.
19. Michie S, Ashford S, Sniehotta FF, Dombrowski SU, Bishop A, French DP. A refined taxonomy of behaviour change techniques to help people change their physical activity and healthy eating behaviours: the CALO-RE taxonomy. *Psychol Health*. 2011;26(11):1479-98.
20. Cane J, O'Connor D, Michie S. Validation of the theoretical domains framework for use in behaviour change and implementation research. *Implement Sci*. 2012;7:37.
21. Werbrück A, al. e. How to empower patients? A systematic review and meta-analysis. *Translational behavioral medicine*. 8:660-74.

22. Twomey C, O'Reilly G, Meyer B. Effectiveness of an individually-tailored computerised CBT programme (Deprexis) for depression: A meta-analysis. *PSYCHIATRY RESEARCH*. 2017;256:371-7.
23. Samdal GB, Eide GE, Barth T, Williams G, Meland E. Effective behaviour change techniques for physical activity and healthy eating in overweight and obese adults; systematic review and meta-regression analyses. *Int J Behav Nutr Phys Act*. 2017;14(1):42.
24. Cavanagh K, Strauss C, Forder L, Jones F. Can mindfulness and acceptance be learnt by self-help?: a systematic review and meta-analysis of mindfulness and acceptance-based self-help interventions. *Clin Psychol Rev*. 2014;34(2):118-29.
25. Fortier MS, Duda J, Guerin E, Teixeira PJ. Promoting physical activity: development and testing of self-determination theory-based interventions. *International Journal of Behavioral Nutrition and Physical Activity*. 2012;9(1):20.
26. Kramer U, Stiles WB. The responsiveness problem in psychotherapy: A review of proposed solutions. *Clinical Psychology: Science and Practice*. 2015;22(3):277-95.
27. Krebs P, Prochaska JO, Rossi JS. A meta-analysis of computer-tailored interventions for health behavior change. *Prev Med*. 2010;51(3-4):214-21.
28. Hawkins RP, Kreuter M, Resnicow K, Fishbein M, Dijkstra A. Understanding tailoring in communicating about health. *Health Educ Res*. 2008;23(3):454-66.
29. Pöttgen J, Moss-Morris R, Wendebourg JM, Feddersen L, Gold SM, Penner IK, et al. Online fatigue management program for patients with multiple sclerosis - a randomized controlled trial. *Mult Scler*. 2015;21(S11):41-2.
30. Zill JM, Meyer B, Topp J, Daubmann A, Harter M, Dirmaier J. Vorvida: study protocol of a randomized controlled trial testing the effectiveness of internet-based self-help program for the reduction of alcohol consumption for adults. *BMC Psychiatry*. 2016;16:19.
31. Berger T, Urech A, Krieger T, Stolz T, Schulz A, Vincent A, et al. Effects of a transdiagnostic unguided Internet intervention ("velibra") for anxiety disorders in primary care: Results of a randomised controlled trial. *Psychological Medicine*. 2017;47(1):67-80.
32. Heesen C, et al. e. What should a person with relapsing-remitting multiple sclerosis know? –Focus group and survey data of a risk knowledge questionnaire (RIKNO 2.0). *Mult Scler Relat Disord*. 2017;18:186-95.
33. Degner LF, Sloan JA, Venkatesh P. The Control Preferences Scale. *Can J Nurs Res*. 1997;29(3):21-43.
34. Hibbard J, Stockard J, R Mahoney E, Tusler M. Development of the Patient Activation Measure (PAM): Conceptualizing and Measuring Activation in Patients and Consumers 2004. 1005-26 p.
35. Chesney MA, Neilands TB, Chambers DB, Taylor JM, Folkman S. A validity and reliability study of the coping self-efficacy scale. *British journal of health psychology*. 2006;11(Pt 3):421-37.
36. Devilly GJ, Borkovec TD. Psychometric properties of the credibility/expectancy questionnaire. *Journal of behavior therapy and experimental psychiatry*. 2000;31(2):73-86.
37. Schwarzer R, Lippke S, Luszczynska A. Mechanisms of health behavior change in persons with chronic illness or disability: The Health Action Process Approach (HAPA). *Rehabilitation psychology*. 2011;56(3):161-70.
38. Bann C, Sirois F, Walsh E. Provider Support in Complementary and Alternative Medicine: Exploring the Role of Patient Empowerment 2010. 745-52 p.
39. Kurtzke JF. Rating neurologic impairment in multiple sclerosis: an expanded disability status scale (EDSS). *Neurology*. 1983;33(11):1444-52.
40. Gold SM, Heesen C, Schulz H, Guder U, Monch A, Gbadamosi J, et al. Disease specific quality of life instruments in multiple sclerosis: validation of the Hamburg Quality of Life Questionnaire in Multiple Sclerosis (HAQUAMS). *Mult Scler*. 2001;7(2):119-30.
41. Herdman M, Gudex C, Lloyd A, Janssen M, Kind P, Parkin D, et al. Development and preliminary testing of the new five-level version of EQ-5D (EQ-5D-5L). *Qual Life Res*. 2011;20(10):1727-36.
42. Zigmond AS, Snaith RP. The hospital anxiety and depression scale. *Acta Psychiatr Scand*. 1983;67(6):361-70.
43. Shephard R. Godin leisure-time exercise questionnaire. *Med Sci Sports Exerc*. 1997;29(suppl 6):S36-S8.

- 1  
2  
3 44. Fuchs R, Klaperski S, Gerber M, Seelig H. Messung der Bewegungs- und Sportaktivität mit  
4 dem BSA-Fragebogen. *Zeitschrift für Gesundheitspsychologie*. 2015;23(2):60-76.
- 5 45. Estruch R, Ros E, Salas-Salvado J, Covas MI, Corella D, Aros F, et al. Primary Prevention of  
6 Cardiovascular Disease with a Mediterranean Diet Supplemented with Extra-Virgin Olive Oil or Nuts.  
7 *N Engl J Med*. 2018;378(25):e34.
- 8 46. Wark PA, Hardie LJ, Frost GS, Alwan NA, Carter M, Elliott P, et al. Validity of an online 24-  
9 h recall tool (myfood24) for dietary assessment in population studies: comparison with biomarkers and  
10 standard interviews. *BMC Med*. 2018;16(1):136.
- 11 47. Krauth C, Hessel FP, Hansmeier T, Wasem J, Seitz R, Schweiker B. Empirical standard costs  
12 for health economic evaluation in Germany - a proposal by the working group methods in health  
13 economic evaluation. *Gesundheitswesen*. 2005;67(10):736-46.
- 14 48. Chernyak N, Ernsting C, Icks A. Pre-test of questions on health-related resource use and  
15 expenditure, using behaviour coding and cognitive interviewing techniques. *BMC Health Services  
16 Research*. 2012;12:303.
- 17 49. Gold MR, Siegel JE, Russell LB, Weinstein MC. Cost-effectiveness in health and medicine.  
18 New York: Oxford University Press; 1996.
- 19 50. Briggs AH, Wonderling DE, Mooney CZ. Pulling cost-effectiveness analysis up by its  
20 bootstraps: a non-parametric approach to confidence interval estimation. *Health economics*.  
21 1997;6(4):327-40.
- 22 51. Fenwick E, O'Brien BJ, Briggs A. Cost-effectiveness acceptability curves--facts, fallacies and  
23 frequently asked questions. *Health economics*. 2004;13(5):405-15.
- 24 52. Rosenkranz SC, Kaulen B, Neuhaus A, Siemonsen S, Kopke S, Daumer M, et al. Low clinical  
25 conversion rate in clinically isolated syndrome patients - diagnostic benefit of McDonald 2010 criteria?  
26 *Eur J Neurol*. 2018;25(2):247-e9.
- 27 53. Friede T, Pohlmann H, Schmidli H. Blinded sample size reestimation in event-driven clinical  
28 trials: Methods and an application in multiple sclerosis. *Pharmaceutical Statistics*. 2019;18:351-65.
- 29 54. Costa L, Bracco P, Vada S, Trossarelli L, Jacobson K. A chemical analysis of the clogging  
30 process of polymeric biliary endoprotheses. *Biomaterials*. 2001;22(23):3113-9.
- 31  
32  
33  
34  
35  
36  
37  
38  
39  
40  
41  
42  
43  
44  
45  
46  
47  
48  
49  
50  
51  
52  
53  
54  
55  
56  
57  
58  
59  
60

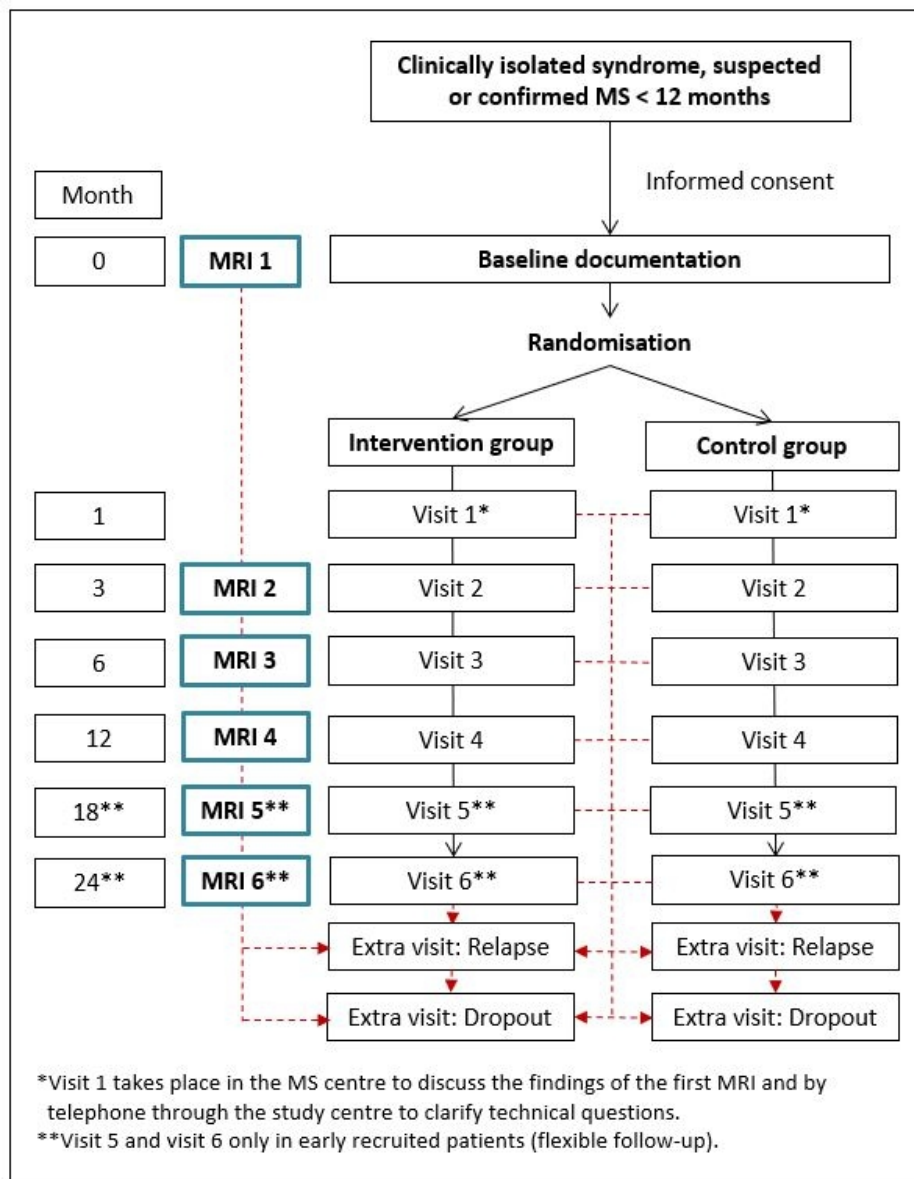

Figure 1: Participant timeline

106x135mm (144 x 144 DPI)

## Appendix I: Process evaluation

A mixed methods approach (1) is used for the process evaluation based on standardised questionnaires and telephone interviews (see Table 2, Figure 2). Further, the outcome assessments of the main study are an important data source for the process evaluation. The process evaluation aims to clarify whether the intervention was delivered as intended (fidelity) and in which quantity (dose) the intervention was implemented (2, 3). Moreover, implementation barriers and facilitators will be explored. As shown in Table 2 and Figure 2, we will assess contextual factors, components associated with recruitment, delivery, responses and maintenance of centres and individuals (PwMS) as well as unintended consequences using different methods.

### *Sampling*

Questionnaires will be provided to all participants. Interviews will be performed with 10 to 20 with PwMS from each study group until information saturation is reached. Of the healthcare providers, up to 10 neurologists and 5 radiologists will be interviewed based on a purposeful sampling strategy, i.e. aiming for a diversity of centres in organisational structure and size.

### *Timing*

The process evaluation will be conducted in parallel to the main trial (see Table 2 for specific timing of assessments).

### *Data analysis*

First, the process evaluation and trial data will be analysed separately. Afterwards, data will be combined and used to determine post-trial interview questions. Quantitative process evaluation data (questionnaires and evaluation forms) will be analysed descriptively using SPSS (International Business Machines Corporation (IBM), Armonk, United States of America) or R (R Development Core Team) software. Subgroup analyses considering study outcomes and patient characteristics will be performed (for example, start of immunotherapy and decision type) in order to explore the impact of the intervention on different groups. Interviews will be analysed by thematic analysis (4) using MAXQDA (5).

### References:

1. Cresswell JW, Plano Clark VL. Designing and Conducting Mixed Methods Research. Sage Publications, Inc. 2010;2.
2. Moore GF, Audrey S, Barker M, Bond L, Bonell C, Hardeman W, et al. Process evaluation of complex interventions: Medical Research Council guidance. *Brit Med J.* 2015;350:h1258.
3. Craig P, Dieppe P, Macintyre S, Michie S, Nazareth I, Petticrew M, et al. Developing and evaluating complex interventions: the new Medical Research Council guidance. *Brit Med J.*
4. Braun V, Clarke V. What can "thematic analysis" offer health and wellbeing researchers? *International journal of qualitative studies on health and well-being.* 2014;9:26152.
5. Kuckartz U, Rädiker S. Analyse qualitativer Daten mit MAXQDA. Springer VS. 2019.

| Overview process evaluation POWER@MS1 |                                                                                                                                                                               |                                                                                                                                                                                                                            |                              |
|---------------------------------------|-------------------------------------------------------------------------------------------------------------------------------------------------------------------------------|----------------------------------------------------------------------------------------------------------------------------------------------------------------------------------------------------------------------------|------------------------------|
| Domain                                | Objects of investigation                                                                                                                                                      | Ascertainment/Data collection tool                                                                                                                                                                                         | Time point                   |
| <b>Context</b>                        | Context factors in Germany (health system)                                                                                                                                    | Description                                                                                                                                                                                                                | Pre-intervention             |
|                                       | Centre-specific structures and processes                                                                                                                                      | Questionnaire, interviews                                                                                                                                                                                                  | Pre-intervention             |
| <b>Recruitment of centres</b>         | Centre recruitment                                                                                                                                                            | Documentation of recruited centres, phone calls or visits in interested centres                                                                                                                                            | Pre-intervention             |
|                                       | Reason for study participation/ for non-participation (promoting factors and barriers)                                                                                        | Questionnaire (neurologists)                                                                                                                                                                                               | Pre- and during intervention |
| <b>Delivery to centres</b>            | Delivery of information (study management) to neurologists, study nurses and radiologists (participation, reach)                                                              | Provision of study materials about the intervention programme, initiation of study centres                                                                                                                                 | Pre-intervention             |
|                                       | Delivery of the study monitoring platform access to all centres                                                                                                               | Provision of access data                                                                                                                                                                                                   | Pre-intervention             |
| <b>Response of centres</b>            | Attitude (neurologists, study nurses and radiologists) regarding the study procedures (e.g. administration, recruitment, clinical visits, MRI frequency) and the intervention | Evaluation forms, interviews                                                                                                                                                                                               | During and post-intervention |
| <b>Maintenance of centres</b>         | Study centres: recruitment of patients                                                                                                                                        | Documentation of recruited patients, evaluation forms, interviews                                                                                                                                                          | During and post-intervention |
| <b>Recruitment of individuals</b>     | Recruitment of PwMS                                                                                                                                                           | Information video (provided online via YouTube and stakeholder websites/ social media/ network distributors/ magazines), study information leaflets, recruitment in the centres (screening lists, baseline questionnaires) | Pre-intervention             |
| <b>Delivery to individuals</b>        | <u>Intervention group</u> : delivery of the intervention to individuals (EBPI about lifestyle factors in MS combined with a complex behaviour change programme)               | Provision of access (login) data, e-mail and text message reminders, monitoring of programme usage, evaluation forms, interviews                                                                                           | During and post-intervention |

|                                                                                                                                                                                                                                                        |                                                                                                                                                                                                  |                                                                                                                                                           |                                                        |
|--------------------------------------------------------------------------------------------------------------------------------------------------------------------------------------------------------------------------------------------------------|--------------------------------------------------------------------------------------------------------------------------------------------------------------------------------------------------|-----------------------------------------------------------------------------------------------------------------------------------------------------------|--------------------------------------------------------|
|                                                                                                                                                                                                                                                        | <u>Control group</u> : delivery of the control intervention to individuals (web-based information on lifestyle factors consisting of optimised standard care material)                           | Provision of access (login) data, e-mail and text message reminders, monitoring of programme usage, evaluation forms, interviews                          | During and post-intervention                           |
| <b>Response of individuals</b>                                                                                                                                                                                                                         | E.g.: Satisfaction with the study procedures (e.g. frequency of MRIs and clinical visits) and the intervention, knowledge, attitude, empowerment, change in behaviour, barriers and facilitators | Questionnaires (primary and secondary endpoints RCT), evaluation forms, interviews                                                                        | Post-intervention, after reaching the primary endpoint |
| <b>Maintenance of individuals</b>                                                                                                                                                                                                                      | <u>PwMS</u> (users of the programme): knowledge, empowerment, change in behaviour and reasons for usage                                                                                          | Questionnaires (primary and secondary endpoints RCT), evaluation forms, interviews                                                                        | During and post-intervention                           |
|                                                                                                                                                                                                                                                        | <u>PwMS</u> (non-user of the programme): knowledge, empowerment, change in behaviour and reasons for non-usage                                                                                   | Contacting participants via e-mail or telephone, questionnaire, interviews                                                                                | During and post-intervention                           |
| <b>Unintended consequences</b>                                                                                                                                                                                                                         | <u>Patients</u> : anxiety, depression, negative impact on disease specific quality of life                                                                                                       | Evaluation form, interviews, secondary outcome measurement                                                                                                | During and post-intervention                           |
|                                                                                                                                                                                                                                                        | <u>Neurologists</u> : professional relationship to patients, barriers for implementation                                                                                                         | Evaluation form, interviews                                                                                                                               | During and post-intervention                           |
|                                                                                                                                                                                                                                                        | <u>Study nurses</u> : stress, professional relationship to patients, barriers for implementation                                                                                                 | Evaluation form, interviews                                                                                                                               | During and post-intervention                           |
| <b>Theory</b>                                                                                                                                                                                                                                          | EBPI, TDF, TPB, Empowerment                                                                                                                                                                      | Application during study planning and the development of study materials, used in evaluation forms, in the programme and in secondary outcome measurement | Pre-, during and post-intervention                     |
| EBPI = evidence-based patient information; MRI = magnetic resonance imaging; MS = Multiple Sclerosis; PwMS = Persons with Multiple Sclerosis; RCT = randomised controlled trial; TDF = Theoretical Domains Framework; TPB = Theory of Planned Behavior |                                                                                                                                                                                                  |                                                                                                                                                           |                                                        |

Table 2: Overview process evaluation POWER@MS 1

Figure 2: Process evaluation POWER@MS1: questions and methods

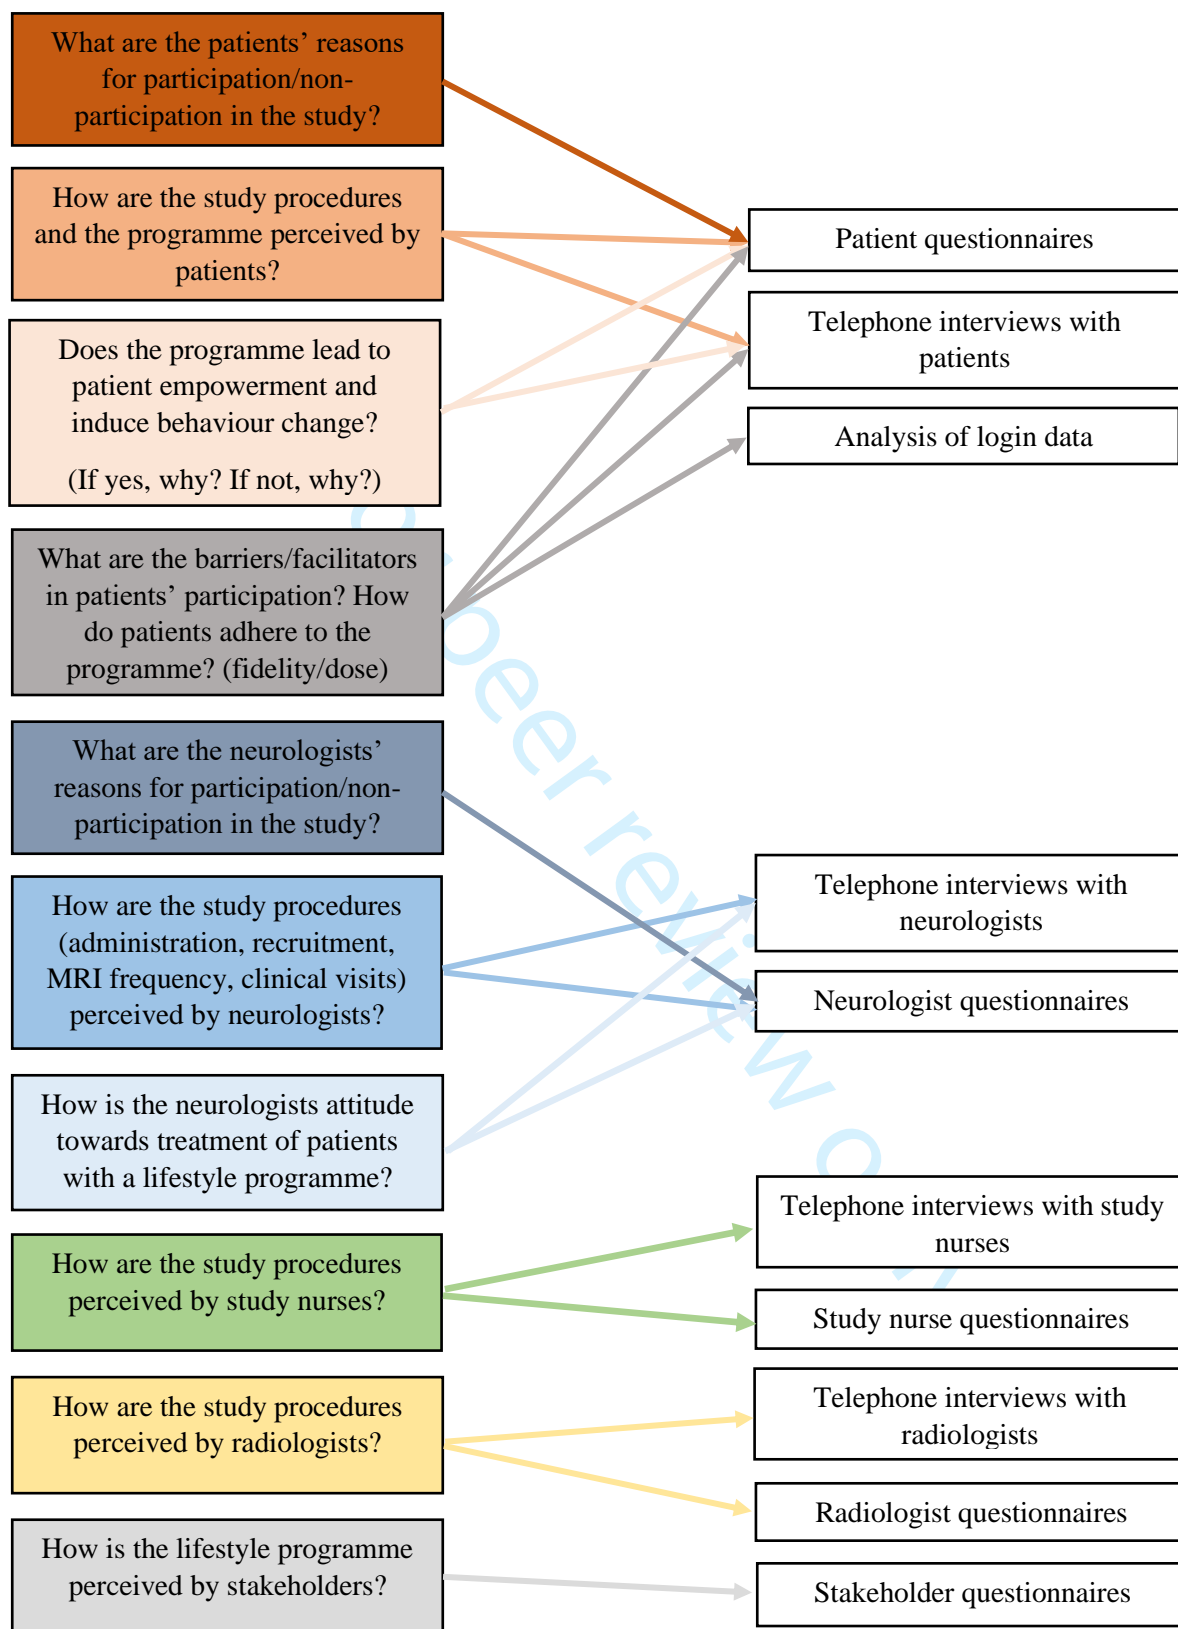



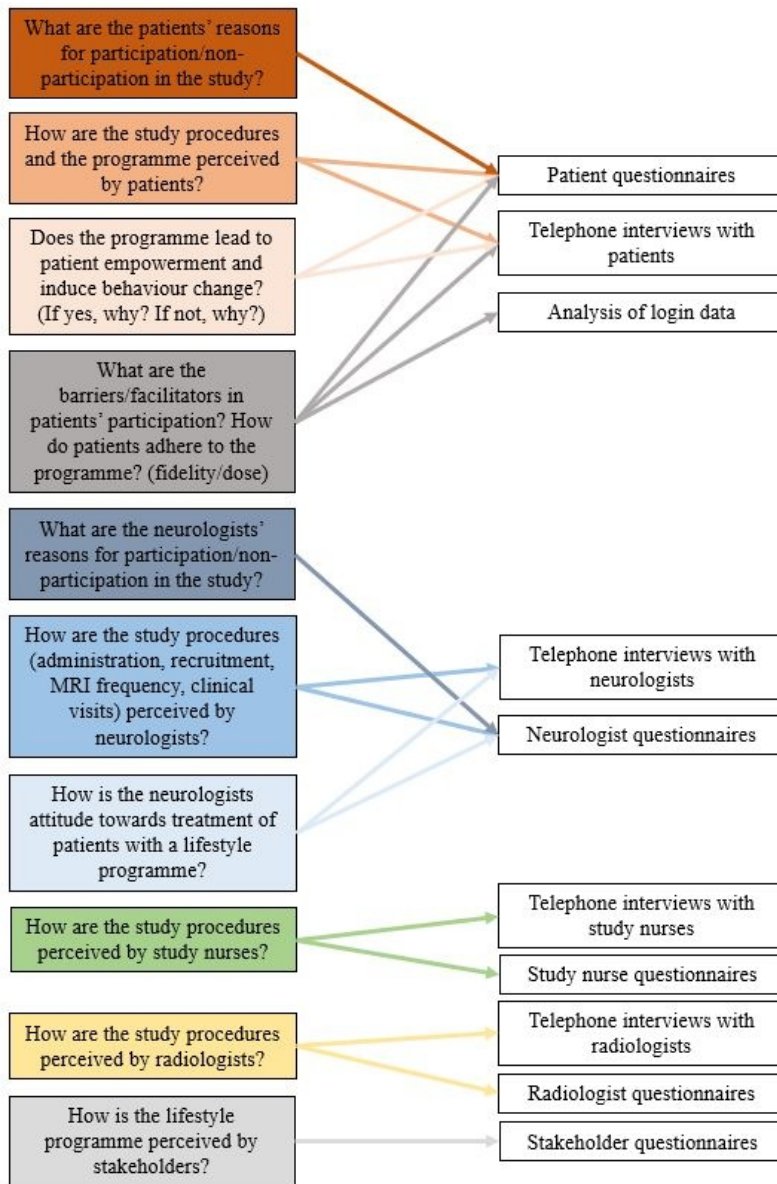

Figure 2: Process evaluation POWER@MS1: questions and methods

95x142mm (144 x 144 DPI)

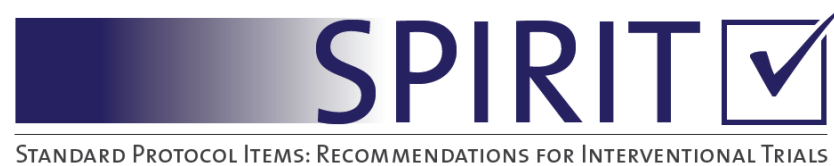

SPIRIT 2013 Checklist: Recommended items to address in a clinical trial protocol and related documents\*

| Section/item                      | Item No | Description                                                                                                                                                                                                                                                                              | Addressed on page number |
|-----------------------------------|---------|------------------------------------------------------------------------------------------------------------------------------------------------------------------------------------------------------------------------------------------------------------------------------------------|--------------------------|
| <b>Administrative information</b> |         |                                                                                                                                                                                                                                                                                          |                          |
| Title                             | 1       | Descriptive title identifying the study design, population, interventions, and, if applicable, trial acronym                                                                                                                                                                             | <u>1</u>                 |
| Trial registration                | 2a      | Trial identifier and registry name. If not yet registered, name of intended registry                                                                                                                                                                                                     | <u>1</u>                 |
|                                   | 2b      | All items from the World Health Organization Trial Registration Data Set                                                                                                                                                                                                                 | <u>N/A</u>               |
| Protocol version                  | 3       | Date and version identifier                                                                                                                                                                                                                                                              | <u>1</u>                 |
| Funding                           | 4       | Sources and types of financial, material, and other support                                                                                                                                                                                                                              | <u>11</u>                |
| Roles and responsibilities        | 5a      | Names, affiliations, and roles of protocol contributors                                                                                                                                                                                                                                  | <u>1</u>                 |
|                                   | 5b      | Name and contact information for the trial sponsor                                                                                                                                                                                                                                       | <u>11</u>                |
|                                   | 5c      | Role of study sponsor and funders, if any, in study design; collection, management, analysis, and interpretation of data; writing of the report; and the decision to submit the report for publication, including whether they will have ultimate authority over any of these activities | <u>11</u>                |
|                                   | 5d      | Composition, roles, and responsibilities of the coordinating centre, steering committee, endpoint adjudication committee, data management team, and other individuals or groups overseeing the trial, if applicable (see Item 21a for data monitoring committee)                         | <u>10</u>                |

|    |                                                           |     |                                                                                                                                                                                                                                                                                                                                                                                |                                                                                                                                                                                                |          |
|----|-----------------------------------------------------------|-----|--------------------------------------------------------------------------------------------------------------------------------------------------------------------------------------------------------------------------------------------------------------------------------------------------------------------------------------------------------------------------------|------------------------------------------------------------------------------------------------------------------------------------------------------------------------------------------------|----------|
| 1  | <b>Introduction</b>                                       |     |                                                                                                                                                                                                                                                                                                                                                                                |                                                                                                                                                                                                |          |
| 2  |                                                           |     |                                                                                                                                                                                                                                                                                                                                                                                |                                                                                                                                                                                                |          |
| 3  | Background and rationale                                  | 6a  | Description of research question and justification for undertaking the trial, including summary of relevant studies (published and unpublished) examining benefits and harms for each intervention                                                                                                                                                                             | <u>2-3</u>                                                                                                                                                                                     |          |
| 4  |                                                           |     |                                                                                                                                                                                                                                                                                                                                                                                |                                                                                                                                                                                                |          |
| 5  |                                                           |     |                                                                                                                                                                                                                                                                                                                                                                                |                                                                                                                                                                                                |          |
| 6  |                                                           | 6b  | Explanation for choice of comparators                                                                                                                                                                                                                                                                                                                                          | <u>5</u>                                                                                                                                                                                       |          |
| 7  |                                                           |     |                                                                                                                                                                                                                                                                                                                                                                                |                                                                                                                                                                                                |          |
| 8  | Objectives                                                | 7   | Specific objectives or hypotheses                                                                                                                                                                                                                                                                                                                                              | <u>3</u>                                                                                                                                                                                       |          |
| 9  |                                                           |     |                                                                                                                                                                                                                                                                                                                                                                                |                                                                                                                                                                                                |          |
| 10 | Trial design                                              | 8   | Description of trial design including type of trial (eg, parallel group, crossover, factorial, single group), allocation ratio, and framework (eg, superiority, equivalence, noninferiority, exploratory)                                                                                                                                                                      | <u>3-4</u>                                                                                                                                                                                     |          |
| 11 |                                                           |     |                                                                                                                                                                                                                                                                                                                                                                                |                                                                                                                                                                                                |          |
| 12 |                                                           |     |                                                                                                                                                                                                                                                                                                                                                                                |                                                                                                                                                                                                |          |
| 13 |                                                           |     |                                                                                                                                                                                                                                                                                                                                                                                |                                                                                                                                                                                                |          |
| 14 | <b>Methods: Participants, interventions, and outcomes</b> |     |                                                                                                                                                                                                                                                                                                                                                                                |                                                                                                                                                                                                |          |
| 15 |                                                           |     |                                                                                                                                                                                                                                                                                                                                                                                |                                                                                                                                                                                                |          |
| 16 | Study setting                                             | 9   | Description of study settings (eg, community clinic, academic hospital) and list of countries where data will be collected. Reference to where list of study sites can be obtained                                                                                                                                                                                             | <u>4</u>                                                                                                                                                                                       |          |
| 17 |                                                           |     |                                                                                                                                                                                                                                                                                                                                                                                |                                                                                                                                                                                                |          |
| 18 |                                                           |     |                                                                                                                                                                                                                                                                                                                                                                                |                                                                                                                                                                                                |          |
| 19 | Eligibility criteria                                      | 10  | Inclusion and exclusion criteria for participants. If applicable, eligibility criteria for study centres and individuals who will perform the interventions (eg, surgeons, psychotherapists)                                                                                                                                                                                   | <u>4</u>                                                                                                                                                                                       |          |
| 20 |                                                           |     |                                                                                                                                                                                                                                                                                                                                                                                |                                                                                                                                                                                                |          |
| 21 |                                                           |     |                                                                                                                                                                                                                                                                                                                                                                                |                                                                                                                                                                                                |          |
| 22 | Interventions                                             | 11a | Interventions for each group with sufficient detail to allow replication, including how and when they will be administered                                                                                                                                                                                                                                                     | <u>4-5</u>                                                                                                                                                                                     |          |
| 23 |                                                           |     |                                                                                                                                                                                                                                                                                                                                                                                |                                                                                                                                                                                                |          |
| 24 |                                                           |     | 11b                                                                                                                                                                                                                                                                                                                                                                            | Criteria for discontinuing or modifying allocated interventions for a given trial participant (eg, drug dose change in response to harms, participant request, or improving/worsening disease) | <u>5</u> |
| 25 |                                                           |     |                                                                                                                                                                                                                                                                                                                                                                                |                                                                                                                                                                                                |          |
| 26 |                                                           |     |                                                                                                                                                                                                                                                                                                                                                                                |                                                                                                                                                                                                |          |
| 27 |                                                           | 11c | Strategies to improve adherence to intervention protocols, and any procedures for monitoring adherence (eg, drug tablet return, laboratory tests)                                                                                                                                                                                                                              | <u>4</u>                                                                                                                                                                                       |          |
| 28 |                                                           |     |                                                                                                                                                                                                                                                                                                                                                                                |                                                                                                                                                                                                |          |
| 29 |                                                           |     |                                                                                                                                                                                                                                                                                                                                                                                |                                                                                                                                                                                                |          |
| 30 |                                                           | 11d | Relevant concomitant care and interventions that are permitted or prohibited during the trial                                                                                                                                                                                                                                                                                  | <u>5</u>                                                                                                                                                                                       |          |
| 31 |                                                           |     |                                                                                                                                                                                                                                                                                                                                                                                |                                                                                                                                                                                                |          |
| 32 | Outcomes                                                  | 12  | Primary, secondary, and other outcomes, including the specific measurement variable (eg, systolic blood pressure), analysis metric (eg, change from baseline, final value, time to event), method of aggregation (eg, median, proportion), and time point for each outcome. Explanation of the clinical relevance of chosen efficacy and harm outcomes is strongly recommended | <u>5-8</u>                                                                                                                                                                                     |          |
| 33 |                                                           |     |                                                                                                                                                                                                                                                                                                                                                                                |                                                                                                                                                                                                |          |
| 34 |                                                           |     |                                                                                                                                                                                                                                                                                                                                                                                |                                                                                                                                                                                                |          |
| 35 | Participant timeline                                      | 13  | Time schedule of enrolment, interventions (including any run-ins and washouts), assessments, and visits for participants. A schematic diagram is highly recommended (see Figure)                                                                                                                                                                                               | <u>8</u>                                                                                                                                                                                       |          |
| 36 |                                                           |     |                                                                                                                                                                                                                                                                                                                                                                                |                                                                                                                                                                                                |          |
| 37 |                                                           |     |                                                                                                                                                                                                                                                                                                                                                                                |                                                                                                                                                                                                |          |
| 38 |                                                           |     |                                                                                                                                                                                                                                                                                                                                                                                |                                                                                                                                                                                                |          |
| 39 |                                                           |     |                                                                                                                                                                                                                                                                                                                                                                                |                                                                                                                                                                                                |          |
| 40 |                                                           |     |                                                                                                                                                                                                                                                                                                                                                                                |                                                                                                                                                                                                |          |
| 41 |                                                           |     |                                                                                                                                                                                                                                                                                                                                                                                |                                                                                                                                                                                                |          |
| 42 |                                                           |     |                                                                                                                                                                                                                                                                                                                                                                                |                                                                                                                                                                                                |          |
| 43 |                                                           |     |                                                                                                                                                                                                                                                                                                                                                                                |                                                                                                                                                                                                |          |
| 44 |                                                           |     |                                                                                                                                                                                                                                                                                                                                                                                |                                                                                                                                                                                                |          |
| 45 |                                                           |     |                                                                                                                                                                                                                                                                                                                                                                                |                                                                                                                                                                                                |          |
| 46 |                                                           |     |                                                                                                                                                                                                                                                                                                                                                                                |                                                                                                                                                                                                |          |

|   |             |    |                                                                                                                                                                                       |          |
|---|-------------|----|---------------------------------------------------------------------------------------------------------------------------------------------------------------------------------------|----------|
| 1 | Sample size | 14 | Estimated number of participants needed to achieve study objectives and how it was determined, including clinical and statistical assumptions supporting any sample size calculations | <u>8</u> |
| 2 |             |    |                                                                                                                                                                                       |          |
| 3 |             |    |                                                                                                                                                                                       |          |
| 4 | Recruitment | 15 | Strategies for achieving adequate participant enrolment to reach target sample size                                                                                                   | <u>8</u> |
| 5 |             |    |                                                                                                                                                                                       |          |

### 6 **Methods: Assignment of interventions (for controlled trials)**

#### 7 Allocation:

|    |                                  |     |                                                                                                                                                                                                                                                                                                                                                          |            |
|----|----------------------------------|-----|----------------------------------------------------------------------------------------------------------------------------------------------------------------------------------------------------------------------------------------------------------------------------------------------------------------------------------------------------------|------------|
| 8  |                                  |     |                                                                                                                                                                                                                                                                                                                                                          |            |
| 9  |                                  |     |                                                                                                                                                                                                                                                                                                                                                          |            |
| 10 | Sequence generation              | 16a | Method of generating the allocation sequence (eg, computer-generated random numbers), and list of any factors for stratification. To reduce predictability of a random sequence, details of any planned restriction (eg, blocking) should be provided in a separate document that is unavailable to those who enrol participants or assign interventions | <u>8</u>   |
| 11 |                                  |     |                                                                                                                                                                                                                                                                                                                                                          |            |
| 12 |                                  |     |                                                                                                                                                                                                                                                                                                                                                          |            |
| 13 |                                  |     |                                                                                                                                                                                                                                                                                                                                                          |            |
| 14 |                                  |     |                                                                                                                                                                                                                                                                                                                                                          |            |
| 15 |                                  |     |                                                                                                                                                                                                                                                                                                                                                          |            |
| 16 | Allocation concealment mechanism | 16b | Mechanism of implementing the allocation sequence (eg, central telephone; sequentially numbered, opaque, sealed envelopes), describing any steps to conceal the sequence until interventions are assigned                                                                                                                                                | <u>8</u>   |
| 17 |                                  |     |                                                                                                                                                                                                                                                                                                                                                          |            |
| 18 |                                  |     |                                                                                                                                                                                                                                                                                                                                                          |            |
| 19 |                                  |     |                                                                                                                                                                                                                                                                                                                                                          |            |
| 20 | Implementation                   | 16c | Who will generate the allocation sequence, who will enrol participants, and who will assign participants to interventions                                                                                                                                                                                                                                | <u>8</u>   |
| 21 |                                  |     |                                                                                                                                                                                                                                                                                                                                                          |            |
| 22 |                                  |     |                                                                                                                                                                                                                                                                                                                                                          |            |
| 23 |                                  |     |                                                                                                                                                                                                                                                                                                                                                          |            |
| 24 | Blinding (masking)               | 17a | Who will be blinded after assignment to interventions (eg, trial participants, care providers, outcome assessors, data analysts), and how                                                                                                                                                                                                                | <u>8</u>   |
| 25 |                                  |     |                                                                                                                                                                                                                                                                                                                                                          |            |
| 26 |                                  |     |                                                                                                                                                                                                                                                                                                                                                          |            |
| 27 |                                  | 17b | If blinded, circumstances under which unblinding is permissible, and procedure for revealing a participant's allocated intervention during the trial                                                                                                                                                                                                     | <u>N/A</u> |
| 28 |                                  |     |                                                                                                                                                                                                                                                                                                                                                          |            |
| 29 |                                  |     |                                                                                                                                                                                                                                                                                                                                                          |            |
| 30 |                                  |     |                                                                                                                                                                                                                                                                                                                                                          |            |

### 31 **Methods: Data collection, management, and analysis**

|    |                         |     |                                                                                                                                                                                                                                                                                                                                                                                                              |            |
|----|-------------------------|-----|--------------------------------------------------------------------------------------------------------------------------------------------------------------------------------------------------------------------------------------------------------------------------------------------------------------------------------------------------------------------------------------------------------------|------------|
| 32 |                         |     |                                                                                                                                                                                                                                                                                                                                                                                                              |            |
| 33 | Data collection methods | 18a | Plans for assessment and collection of outcome, baseline, and other trial data, including any related processes to promote data quality (eg, duplicate measurements, training of assessors) and a description of study instruments (eg, questionnaires, laboratory tests) along with their reliability and validity, if known. Reference to where data collection forms can be found, if not in the protocol | <u>8-9</u> |
| 34 |                         |     |                                                                                                                                                                                                                                                                                                                                                                                                              |            |
| 35 |                         |     |                                                                                                                                                                                                                                                                                                                                                                                                              |            |
| 36 |                         |     |                                                                                                                                                                                                                                                                                                                                                                                                              |            |
| 37 |                         |     |                                                                                                                                                                                                                                                                                                                                                                                                              |            |
| 38 |                         |     |                                                                                                                                                                                                                                                                                                                                                                                                              |            |
| 39 |                         | 18b | Plans to promote participant retention and complete follow-up, including list of any outcome data to be collected for participants who discontinue or deviate from intervention protocols                                                                                                                                                                                                                    | <u>8-9</u> |
| 40 |                         |     |                                                                                                                                                                                                                                                                                                                                                                                                              |            |
| 41 |                         |     |                                                                                                                                                                                                                                                                                                                                                                                                              |            |
| 42 |                         |     |                                                                                                                                                                                                                                                                                                                                                                                                              |            |

|    |                                 |     |                                                                                                                                                                                                                                                                                                                                       |              |
|----|---------------------------------|-----|---------------------------------------------------------------------------------------------------------------------------------------------------------------------------------------------------------------------------------------------------------------------------------------------------------------------------------------|--------------|
| 1  | Data management                 | 19  | Plans for data entry, coding, security, and storage, including any related processes to promote data quality (eg, double data entry; range checks for data values). Reference to where details of data management procedures can be found, if not in the protocol                                                                     | <u>9</u>     |
| 2  |                                 |     |                                                                                                                                                                                                                                                                                                                                       |              |
| 3  |                                 |     |                                                                                                                                                                                                                                                                                                                                       |              |
| 4  |                                 |     |                                                                                                                                                                                                                                                                                                                                       |              |
| 5  | Statistical methods             | 20a | Statistical methods for analysing primary and secondary outcomes. Reference to where other details of the statistical analysis plan can be found, if not in the protocol                                                                                                                                                              | <u>9-10</u>  |
| 6  |                                 |     |                                                                                                                                                                                                                                                                                                                                       |              |
| 7  |                                 |     |                                                                                                                                                                                                                                                                                                                                       |              |
| 8  |                                 | 20b | Methods for any additional analyses (eg, subgroup and adjusted analyses)                                                                                                                                                                                                                                                              | <u>9</u>     |
| 9  |                                 |     |                                                                                                                                                                                                                                                                                                                                       |              |
| 10 |                                 | 20c | Definition of analysis population relating to protocol non-adherence (eg, as randomised analysis), and any statistical methods to handle missing data (eg, multiple imputation)                                                                                                                                                       | <u>9</u>     |
| 11 |                                 |     |                                                                                                                                                                                                                                                                                                                                       |              |
| 12 |                                 |     |                                                                                                                                                                                                                                                                                                                                       |              |
| 13 |                                 |     |                                                                                                                                                                                                                                                                                                                                       |              |
| 14 | <b>Methods: Monitoring</b>      |     |                                                                                                                                                                                                                                                                                                                                       |              |
| 15 |                                 |     |                                                                                                                                                                                                                                                                                                                                       |              |
| 16 | Data monitoring                 | 21a | Composition of data monitoring committee (DMC); summary of its role and reporting structure; statement of whether it is independent from the sponsor and competing interests; and reference to where further details about its charter can be found, if not in the protocol. Alternatively, an explanation of why a DMC is not needed | <u>10</u>    |
| 17 |                                 |     |                                                                                                                                                                                                                                                                                                                                       |              |
| 18 |                                 |     |                                                                                                                                                                                                                                                                                                                                       |              |
| 19 |                                 |     |                                                                                                                                                                                                                                                                                                                                       |              |
| 20 |                                 |     |                                                                                                                                                                                                                                                                                                                                       |              |
| 21 |                                 |     |                                                                                                                                                                                                                                                                                                                                       |              |
| 22 |                                 | 21b | Description of any interim analyses and stopping guidelines, including who will have access to these interim results and make the final decision to terminate the trial                                                                                                                                                               | <u>10</u>    |
| 23 |                                 |     |                                                                                                                                                                                                                                                                                                                                       |              |
| 24 |                                 |     |                                                                                                                                                                                                                                                                                                                                       |              |
| 25 | Harms                           | 22  | Plans for collecting, assessing, reporting, and managing solicited and spontaneously reported adverse events and other unintended effects of trial interventions or trial conduct                                                                                                                                                     | <u>10</u>    |
| 26 |                                 |     |                                                                                                                                                                                                                                                                                                                                       |              |
| 27 |                                 |     |                                                                                                                                                                                                                                                                                                                                       |              |
| 28 | Auditing                        | 23  | Frequency and procedures for auditing trial conduct, if any, and whether the process will be independent from investigators and the sponsor                                                                                                                                                                                           | <u>10</u>    |
| 29 |                                 |     |                                                                                                                                                                                                                                                                                                                                       |              |
| 30 |                                 |     |                                                                                                                                                                                                                                                                                                                                       |              |
| 31 |                                 |     |                                                                                                                                                                                                                                                                                                                                       |              |
| 32 | <b>Ethics and dissemination</b> |     |                                                                                                                                                                                                                                                                                                                                       |              |
| 33 |                                 |     |                                                                                                                                                                                                                                                                                                                                       |              |
| 34 | Research ethics approval        | 24  | Plans for seeking research ethics committee/institutional review board (REC/IRB) approval                                                                                                                                                                                                                                             | <u>2, 11</u> |
| 35 |                                 |     |                                                                                                                                                                                                                                                                                                                                       |              |
| 36 |                                 |     |                                                                                                                                                                                                                                                                                                                                       |              |
| 37 | Protocol amendments             | 25  | Plans for communicating important protocol modifications (eg, changes to eligibility criteria, outcomes, analyses) to relevant parties (eg, investigators, REC/IRBs, trial participants, trial registries, journals, regulators)                                                                                                      | <u>11</u>    |
| 38 |                                 |     |                                                                                                                                                                                                                                                                                                                                       |              |
| 39 |                                 |     |                                                                                                                                                                                                                                                                                                                                       |              |
| 40 |                                 |     |                                                                                                                                                                                                                                                                                                                                       |              |
| 41 |                                 |     |                                                                                                                                                                                                                                                                                                                                       |              |
| 42 |                                 |     |                                                                                                                                                                                                                                                                                                                                       |              |

|    |                               |     |                                                                                                                                                                                                                                                                                     |                             |
|----|-------------------------------|-----|-------------------------------------------------------------------------------------------------------------------------------------------------------------------------------------------------------------------------------------------------------------------------------------|-----------------------------|
| 1  | Consent or assent             | 26a | Who will obtain informed consent or assent from potential trial participants or authorised surrogates, and how (see Item 32)                                                                                                                                                        | <u>10</u>                   |
| 2  |                               |     |                                                                                                                                                                                                                                                                                     |                             |
| 3  |                               |     |                                                                                                                                                                                                                                                                                     |                             |
| 4  |                               | 26b | Additional consent provisions for collection and use of participant data and biological specimens in ancillary studies, if applicable                                                                                                                                               | <u>N/A</u>                  |
| 5  |                               |     |                                                                                                                                                                                                                                                                                     |                             |
| 6  |                               |     |                                                                                                                                                                                                                                                                                     |                             |
| 7  | Confidentiality               | 27  | How personal information about potential and enrolled participants will be collected, shared, and maintained in order to protect confidentiality before, during, and after the trial                                                                                                | <u>9-10</u>                 |
| 8  |                               |     |                                                                                                                                                                                                                                                                                     |                             |
| 9  |                               |     |                                                                                                                                                                                                                                                                                     |                             |
| 10 | Declaration of interests      | 28  | Financial and other competing interests for principal investigators for the overall trial and each study site                                                                                                                                                                       | <u>11</u>                   |
| 11 |                               |     |                                                                                                                                                                                                                                                                                     |                             |
| 12 |                               |     |                                                                                                                                                                                                                                                                                     |                             |
| 13 | Access to data                | 29  | Statement of who will have access to the final trial dataset, and disclosure of contractual agreements that limit such access for investigators                                                                                                                                     | <u>10</u>                   |
| 14 |                               |     |                                                                                                                                                                                                                                                                                     |                             |
| 15 |                               |     |                                                                                                                                                                                                                                                                                     |                             |
| 16 | Ancillary and post-trial care | 30  | Provisions, if any, for ancillary and post-trial care, and for compensation to those who suffer harm from trial participation                                                                                                                                                       | <u>N/A</u>                  |
| 17 |                               |     |                                                                                                                                                                                                                                                                                     |                             |
| 18 |                               |     |                                                                                                                                                                                                                                                                                     |                             |
| 19 |                               |     |                                                                                                                                                                                                                                                                                     |                             |
| 20 | Dissemination policy          | 31a | Plans for investigators and sponsor to communicate trial results to participants, healthcare professionals, the public, and other relevant groups (eg, via publication, reporting in results databases, or other data sharing arrangements), including any publication restrictions | <u>10</u>                   |
| 21 |                               |     |                                                                                                                                                                                                                                                                                     |                             |
| 22 |                               |     |                                                                                                                                                                                                                                                                                     |                             |
| 23 |                               |     |                                                                                                                                                                                                                                                                                     |                             |
| 24 |                               | 31b | Authorship eligibility guidelines and any intended use of professional writers                                                                                                                                                                                                      | <u>10</u>                   |
| 25 |                               |     |                                                                                                                                                                                                                                                                                     |                             |
| 26 |                               | 31c | Plans, if any, for granting public access to the full protocol, participant-level dataset, and statistical code                                                                                                                                                                     | <u>10</u>                   |
| 27 |                               |     |                                                                                                                                                                                                                                                                                     |                             |
| 28 |                               |     |                                                                                                                                                                                                                                                                                     |                             |
| 29 | <b>Appendices</b>             |     |                                                                                                                                                                                                                                                                                     |                             |
| 30 |                               |     |                                                                                                                                                                                                                                                                                     |                             |
| 31 | Informed consent materials    | 32  | Model consent form and other related documentation given to participants and authorised surrogates                                                                                                                                                                                  | <u>Appendix<sup>o</sup></u> |
| 32 |                               |     |                                                                                                                                                                                                                                                                                     |                             |
| 33 |                               |     |                                                                                                                                                                                                                                                                                     |                             |
| 34 | Biological specimens          | 33  | Plans for collection, laboratory evaluation, and storage of biological specimens for genetic or molecular analysis in the current trial and for future use in ancillary studies, if applicable                                                                                      | <u>N/A</u>                  |
| 35 |                               |     |                                                                                                                                                                                                                                                                                     |                             |
| 36 |                               |     |                                                                                                                                                                                                                                                                                     |                             |

\*It is strongly recommended that this checklist be read in conjunction with the SPIRIT 2013 Explanation & Elaboration for important clarification on the items. Amendments to the protocol should be tracked and dated. The SPIRIT checklist is copyrighted by the SPIRIT Group under the Creative Commons "[Attribution-NonCommercial-NoDerivs 3.0 Unported](https://creativecommons.org/licenses/by-nc-nd/3.0/)" license.

<sup>o</sup>Available in German.

# BMJ Open

## Study protocol for a randomised controlled trial of a web-based behavioural lifestyle programme for emPOWERment in early Multiple Sclerosis (POWER@MS1)

|                                 |                                                                                                                                                                                                                                                                                                                                                                                                                                                                                                                                                                                                                                                                                                                                                                                                                                                                                                                                                                                                                                                                                                                                                                                                                                                                                                                                                                                                                                                                                                                                                                                                                                                                                                                                                                                                                                                                                                                                                                                                                                                  |
|---------------------------------|--------------------------------------------------------------------------------------------------------------------------------------------------------------------------------------------------------------------------------------------------------------------------------------------------------------------------------------------------------------------------------------------------------------------------------------------------------------------------------------------------------------------------------------------------------------------------------------------------------------------------------------------------------------------------------------------------------------------------------------------------------------------------------------------------------------------------------------------------------------------------------------------------------------------------------------------------------------------------------------------------------------------------------------------------------------------------------------------------------------------------------------------------------------------------------------------------------------------------------------------------------------------------------------------------------------------------------------------------------------------------------------------------------------------------------------------------------------------------------------------------------------------------------------------------------------------------------------------------------------------------------------------------------------------------------------------------------------------------------------------------------------------------------------------------------------------------------------------------------------------------------------------------------------------------------------------------------------------------------------------------------------------------------------------------|
| Journal:                        | <i>BMJ Open</i>                                                                                                                                                                                                                                                                                                                                                                                                                                                                                                                                                                                                                                                                                                                                                                                                                                                                                                                                                                                                                                                                                                                                                                                                                                                                                                                                                                                                                                                                                                                                                                                                                                                                                                                                                                                                                                                                                                                                                                                                                                  |
| Manuscript ID                   | bmjopen-2020-041720.R1                                                                                                                                                                                                                                                                                                                                                                                                                                                                                                                                                                                                                                                                                                                                                                                                                                                                                                                                                                                                                                                                                                                                                                                                                                                                                                                                                                                                                                                                                                                                                                                                                                                                                                                                                                                                                                                                                                                                                                                                                           |
| Article Type:                   | Protocol                                                                                                                                                                                                                                                                                                                                                                                                                                                                                                                                                                                                                                                                                                                                                                                                                                                                                                                                                                                                                                                                                                                                                                                                                                                                                                                                                                                                                                                                                                                                                                                                                                                                                                                                                                                                                                                                                                                                                                                                                                         |
| Date Submitted by the Author:   | 05-Oct-2020                                                                                                                                                                                                                                                                                                                                                                                                                                                                                                                                                                                                                                                                                                                                                                                                                                                                                                                                                                                                                                                                                                                                                                                                                                                                                                                                                                                                                                                                                                                                                                                                                                                                                                                                                                                                                                                                                                                                                                                                                                      |
| Complete List of Authors:       | <p>Krause, Nicole; Institute of Neuroimmunology and Multiple Sclerosis (INIMS), University Medical Center Hamburg-Eppendorf<br/> Riemann-Lorenz, Karin; Institute of Neuroimmunology and Multiple Sclerosis (INIMS), University Medical Center Hamburg-Eppendorf<br/> Steffen, Tanja; Institute of Neuroimmunology and Multiple Sclerosis (INIMS), University Medical Center Hamburg-Eppendorf<br/> Rahn, Anne; Institute of Neuroimmunology and Multiple Sclerosis (INIMS), University Medical Center Hamburg-Eppendorf; Department of Health Services Research, Carl von Ossietzky University Oldenburg<br/> Pöttgen, Jana; Institute of Neuroimmunology and Multiple Sclerosis (INIMS), University Medical Center Hamburg-Eppendorf; Department of Neurology, University Medical Center Hamburg-Eppendorf<br/> Stellmann, Jan-Patrick; Institute of Neuroimmunology and Multiple Sclerosis (INIMS), University Medical Center Hamburg-Eppendorf; APHM, Hopital de la Timone, CEMEREM<br/> Koepke, Sascha; Institute of Nursing Science, University of Cologne<br/> Friede, Tim; Institute for Medical Statistics, University Medical Centre Göttingen<br/> Icks, Andrea; Institute for Health Services Research and Health Economics, Heinrich Heine University Düsseldorf<br/> Vomhof, Markus; Institute for Health Services Research and Health Economics, Heinrich Heine University Düsseldorf<br/> Temmes, Herbert; Deutsche Multiple Sklerose Gesellschaft, Bundesverband e.V.<br/> van de Loo, Markus; Deutsche Multiple Sklerose Gesellschaft, Bundesverband e.V.<br/> Gold, Stefan M.; Institute of Neuroimmunology and Multiple Sclerosis (INIMS), University Medical Center Hamburg-Eppendorf; Charité Universitätsmedizin Berlin, Department of Psychiatry and Medical Department, Section Psychosomatic Medicine (CBF)<br/> Heesen, Christoph; Institute of Neuroimmunology and Multiple Sclerosis (INIMS), University Medical Center Hamburg-Eppendorf; Department of Neurology, University Medical Center Hamburg-Eppendorf</p> |
| <b>Primary Subject Heading</b>: | Neurology                                                                                                                                                                                                                                                                                                                                                                                                                                                                                                                                                                                                                                                                                                                                                                                                                                                                                                                                                                                                                                                                                                                                                                                                                                                                                                                                                                                                                                                                                                                                                                                                                                                                                                                                                                                                                                                                                                                                                                                                                                        |
| Secondary Subject Heading:      | Evidence based practice, Patient-centred medicine, Public health, Communication                                                                                                                                                                                                                                                                                                                                                                                                                                                                                                                                                                                                                                                                                                                                                                                                                                                                                                                                                                                                                                                                                                                                                                                                                                                                                                                                                                                                                                                                                                                                                                                                                                                                                                                                                                                                                                                                                                                                                                  |

1  
2  
3  
4  
5  
6  
7  
8  
9  
10  
11  
12  
13  
14  
15  
16  
17  
18  
19  
20  
21  
22  
23  
24  
25  
26  
27  
28  
29  
30  
31  
32  
33  
34  
35  
36  
37  
38  
39  
40  
41  
42  
43  
44  
45  
46  
47  
48  
49  
50  
51  
52  
53  
54  
55  
56  
57  
58  
59  
60

|           |                                                                                                                                                                                          |
|-----------|------------------------------------------------------------------------------------------------------------------------------------------------------------------------------------------|
| Keywords: | Multiple sclerosis < NEUROLOGY, PUBLIC HEALTH, Clinical trials < THERAPEUTICS, Information technology < BIOTECHNOLOGY & BIOINFORMATICS, Magnetic resonance imaging < RADIOLOGY & IMAGING |
|           |                                                                                                                                                                                          |

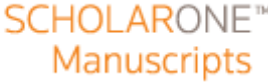





I, the Submitting Author has the right to grant and does grant on behalf of all authors of the Work (as defined in the below author licence), an exclusive licence and/or a non-exclusive licence for contributions from authors who are: i) UK Crown employees; ii) where BMJ has agreed a CC-BY licence shall apply, and/or iii) in accordance with the terms applicable for US Federal Government officers or employees acting as part of their official duties; on a worldwide, perpetual, irrevocable, royalty-free basis to BMJ Publishing Group Ltd ("BMJ") its licensees and where the relevant Journal is co-owned by BMJ to the co-owners of the Journal, to publish the Work in this journal and any other BMJ products and to exploit all rights, as set out in our [licence](#).

The Submitting Author accepts and understands that any supply made under these terms is made by BMJ to the Submitting Author unless you are acting as an employee on behalf of your employer or a postgraduate student of an affiliated institution which is paying any applicable article publishing charge ("APC") for Open Access articles. Where the Submitting Author wishes to make the Work available on an Open Access basis (and intends to pay the relevant APC), the terms of reuse of such Open Access shall be governed by a Creative Commons licence – details of these licences and which [Creative Commons](#) licence will apply to this Work are set out in our licence referred to above.

Other than as permitted in any relevant BMJ Author's Self Archiving Policies, I confirm this Work has not been accepted for publication elsewhere, is not being considered for publication elsewhere and does not duplicate material already published. I confirm all authors consent to publication of this Work and authorise the granting of this licence.

# Study protocol for a randomised controlled trial of a web-based behavioural lifestyle programme for emPOWERment in early Multiple Sclerosis (POWER@MS1)

Nicole Krause<sup>1</sup>, Karin Riemann-Lorenz<sup>1</sup>, Tanja Steffen<sup>1</sup>, Anne Christin Rahn<sup>1,2</sup>, Jana Pöttgen<sup>1,3</sup>, Jan-Patrick Stellmann<sup>1,4</sup>, Sascha Köpke<sup>5</sup>, Tim Friede<sup>6</sup>, Andrea Icks<sup>7</sup>, Markus Vomhof<sup>7</sup>, Herbert Temmes<sup>8</sup>, Markus van de Loo<sup>8</sup>, Stefan M. Gold<sup>1,9</sup> and Christoph Heesen<sup>1,3</sup>

---

## Correspondence to

Nicole Krause; Institute of Neuroimmunology and Multiple Sclerosis (INIMS), University Medical Center Hamburg-Eppendorf, Martinistraße 52, 20246 Hamburg, Germany; n.krause@uke.de

## Author affiliations

<sup>1</sup> Institute of Neuroimmunology and Multiple Sclerosis (INIMS), University Medical Center Hamburg-Eppendorf, Hamburg, Germany

<sup>2</sup> Department of Health Services Research, Carl von Ossietzky University Oldenburg, Oldenburg, Germany

<sup>3</sup> Department of Neurology, University Medical Center Hamburg-Eppendorf, Hamburg, Germany

<sup>4</sup> APHM, Hopital de la Timone, CEMEREM, Marseille, France

<sup>5</sup> Institute of Nursing Science, University of Cologne, Cologne, Germany

<sup>6</sup> Institute for Medical Statistics, University Medical Centre Göttingen, Göttingen, Germany

<sup>7</sup> Institute for Health Services Research and Health Economics, Heinrich Heine University Düsseldorf, Düsseldorf, Germany

<sup>8</sup> Deutsche Multiple Sklerose Gesellschaft, Bundesverband e.V., Hannover, Germany

<sup>9</sup> Charité Universitätsmedizin Berlin, Department of Psychiatry and Medical Department, Section Psychosomatic Medicine (CBF), Berlin, Germany

**Word count:** 4,098

**Issue date:** 2<sup>nd</sup> October 2020

**Protocol amendment number:** 02

## ABSTRACT

**Introduction** Multiple sclerosis (MS) is an inflammatory and degenerative disease of the central nervous system that mainly affects young adults. Uncertainty is a major psychological burden of the disease from diagnosis to prognosis, enhanced by the pressure to make early decisions on a diverse set of immunotherapies. Watchful waiting for 1-2 years while adapting goals and lifestyle habits to life with a chronic disease represents another reasonable option for persons with MS (PwMS). A behaviour change programme based on evidence-based patient information (EBPI) is not available in standard care. This randomised controlled trial (RCT) investigates the hypothesis that such a programme can change patient behaviour and reduce inflammatory disease activity in PwMS.

**Methods and analysis** A multiphase-mixed-methods study will be conducted. The web-based behavioural intervention was evaluated and revised in a feasibility and pilot phase with experts and PwMS. The intervention will be evaluated in a RCT aiming to recruit 328 persons with clinically isolated syndrome (CIS), suspected MS or confirmed MS for less than one year, who have not yet started immunotherapy. Moreover, a mixed-methods process evaluation and a health economic evaluation will be carried out. Participants will be recruited in at least 16 MS centres across Germany and randomised to an intervention group with 12 months of access to EBPI about lifestyle factors in MS, combined with a complex behaviour change programme or to a control group (optimised standard care). The combined primary endpoint is the incidence of new T2 lesions on magnetic resonance imaging or confirmed relapses.

**Ethics and dissemination** The study has been approved by the Ethics Committee of the Hamburg Chamber of Physicians (PV6015) and prospectively registered at ClinicalTrials.gov (NCT03968172). Trial results will be communicated at scientific conferences and meetings and presented on relevant patient websites and in patient education seminars.

**Keywords** Multiple sclerosis, Complex intervention, Lifestyle intervention, Randomised controlled trial, Evidence-based medicine

### Strengths and limitations of this study

- Patients are actively involved in the development process of the intervention group programme in order to address the complex needs of newly diagnosed PwMS.
- This study provides an opportunity to test if lifestyle interventions can influence surrogate measures of disease activity in an immune-mediated disease.
- Evidence for benefits of lifestyle interventions beyond general wellbeing could considerably strengthen the importance of lifestyle management in healthcare.
- The intervention does not include personal consultation, which may limit the extent and sustainability of changes in lifestyle habits.
- Designing a pragmatic trial, we chose predominantly patient reported secondary clinical outcomes while more sophisticated instruments, as e.g. accelerometry, might yield more accurate estimates.

---

## INTRODUCTION

Multiple Sclerosis (MS) is an inflammatory and degenerative disease of the central nervous system (CNS) that affects about 240,000 people in Germany, typically first diagnosed during

1  
2  
3 early adulthood (1). Over the past decade, new diagnostic criteria (2) enabled earlier diagnosis  
4 of the disease and magnetic resonance imaging (MRI) has become a crucial diagnostic and  
5 prognostic instrument. Moreover, MRI is used for the evaluation of treatment success despite  
6 considerable limitations (3). However, there is still no highly specific diagnostic marker and  
7 diagnosis may remain unclear for years. In addition, reliable prognosis remains difficult and it  
8 is hardly possible to estimate the long-term expected disability, especially when based on  
9 disease development during the first 1-2 years after onset. For this reason, diagnostic  
10 information about MS is often experienced as traumatising and can cause disappointment and  
11 distrust in the medical system at an early stage (4). Although available immunotherapies reduce  
12 relapse rates, the long-term benefit on disability progression remains unclear (5, 6).  
13 Nevertheless, early therapy directly after MS diagnosis is recommended (7), while adherence  
14 to immunotherapy in the first two years may be as low as 30-50% (8). These manifold  
15 uncertainties and the resulting psychological stress may have a negative effect on MS disease  
16 activity (9).  
17  
18  
19  
20

21 Surveys have shown that PwMS are a patient group that frequently uses internet sources to  
22 gather information (10). However, these sources often provide contradictory and poorly curated  
23 advice on lifestyle-related matters (11). The existing care structures cannot meet the complex  
24 information needs of PwMS. There is a high potential of lifestyle management with regard to  
25 improved quality of life and a reduction of inflammatory disease activity as well as reduced  
26 neurodegeneration in MS (12, 13). Rigorous studies are largely missing and systematic,  
27 evidence-based patient information (EBPI) about lifestyle factors in MS combined with a  
28 behaviour change programme is not available. Training and empowerment interventions in MS  
29 have so far mainly been studied in face-to-face or group programmes (14). Despite few  
30 examples on change of physical activity behaviour in MS, such as Motl et al. (15), online  
31 interventions in MS have mainly been investigated for the management of symptoms such as  
32 depression and fatigue (16, 17), but not for change of overall lifestyle behaviour.  
33 POWER@MS1 aims to encourage PwMS to find the best way of dealing with the disease on  
34 the basis of EBPI and a complex behaviour change intervention. The goal of this programme is  
35 a more targeted immunotherapy initiation. Moreover, the programme aims to optimise coping  
36 strategies and lifestyle habits, such as stress management, sleeping behaviour, physical activity  
37 and dietary behaviour.  
38  
39  
40  
41  
42

### 43 **Objectives**

44  
45 This study investigates the hypothesis that EBPI about lifestyle factors in MS combined with a  
46 complex behaviour change programme (EBBC programme) can reduce inflammatory disease  
47 activity in MS and change patient behaviour.  
48

#### 49 *Primary objective*

50  
51 To determine if the EBBC programme can reduce inflammatory disease activity in MS as  
52 measured clinically by relapses or by new T2 lesions on MRI.  
53

#### 54 *Secondary objectives*

55  
56 The secondary objectives are to determine if the EBBC programme can

- 57 • strengthen patient autonomy and empowerment
- 58 • promote informed decisions on immunotherapy,
- 59 • improve quality of life,  
60

- reduce anxiety and depression,
- increase physical activity and a healthy dietary behaviour,
- increase effectiveness of neurologist consultations,
- fit with users and contextual factors,
- and save health care costs.

## METHODS AND ANALYSIS

### Study design

A 'multiphase-mixed-methods-study' covering the first three phases of the Medical Research Council (MRC) Framework for the development and evaluation of complex interventions (18) will be conducted:

1. Development: A web-based behavioural intervention programme was adapted and designed as a highly individualized system based on simulated dialogues (coordinated information provision based on the existing health beliefs and interests). The theoretical models used to develop the intervention are shortly outlined in the "Interventions" section. This programme provides PwMS with EBPI partly based on previous work of the research team (13). In addition, a web-based control group programme was developed based on information material available from the German Multiple Sclerosis Society (DMSG). Details with regard to the development and adaptation process will be reported in a separate publication.

2. Feasibility: Feasibility testing involved several aspects, such as examination of practicability and acceptance. At an early stage of development, the intervention programme was presented to expert PwMS (e.g. PwMS who are deeply involved in information strategies or in exchange with other PwMS as well as PwMS who have responsible roles in self-help organisations or advocacy roles) and evaluated using qualitative methods (think-aloud, teach-back) and closed questions. Subsequently, it was presented to and discussed with medical MS experts in a pre-test phase. The outcome instruments as well as the tool were then piloted with PwMS in order to assess comprehensibility, user-friendliness and acceptance, followed by a final revision of the programme. Results of feasibility testing and piloting, including revisions of the programme, will be published separately.

3. Evaluation: The intervention will be evaluated in a superiority, rater-blinded, randomised controlled, parallel group trial. This protocol is focusing purely on the RCT. Study participants will be randomised to the intervention group (IG) with access to the EBBC programme in addition to standard of care or to the control group (CG) with optimised standard care using an allocation ratio of 1:1. In addition, a mixed-methods process evaluation (see Appendix I) and a health economic evaluation will be carried out.

### Study setting

Recruitment and neurological encounters will take place in community clinics, private practises, and academic hospitals with a specialisation in MS across Germany.

### Eligibility criteria

Persons aged between 18 and 65 years with CIS, suspected or confirmed MS for less than 12 months, who signed informed consent, will be included. Furthermore, they must have at least two MS-typical lesions on T2-weighted images on MRI scans and an MS typical cerebrospinal fluid finding with detection of oligoclonal bands. Internet access is mandatory for participation.

1  
2  
3 PwMS who are not able to provide informed consent or have a substantial psychiatric disorder  
4 or substantial cognitive deficit based on clinical impression will be excluded. PwMS who have  
5 been treated with glatiramer acetate, teriflunomide, dimethylfumarate or interferons within the  
6 last six months prior to study inclusion or have received corticosteroid therapy within 4 weeks  
7 prior to study inclusion will also be excluded. PwMS with a planned treatment start within three  
8 months after inclusion or PwMS who had received any other MS-specific immunotherapy at  
9 any time in the past will not be eligible. Pregnancy and claustrophobia are also exclusion  
10 criteria.  
11  
12

### 13 **Interventions**

14  
15 Eligible PwMS will be randomised to the IG programme or the CG programme. Both  
16 programmes will be offered online on the same platform with a similar design.  
17  
18

#### 19 *Intervention group (IG): EBBC programme*

20  
21 The IG programme is an MS-specific adaptation of the earlier developed “Optimmune®” tool  
22 by GAIA (<https://gaia-group.com/en/>). Based on current research and theory of the field (19-  
23 21), it was developed for lifestyle management in cancer patients based on empowerment (22)  
24 and cognitive behavioural therapy (CBT) approaches, including acceptance and mindfulness  
25 oriented techniques (23-25). These techniques influence different theoretical domains as  
26 outlined in the theoretical domains framework (21) and thereby the participants' ability,  
27 motivation and opportunity to change their physical activity, stress management attitudes and  
28 dietary behaviour. For example, CBT techniques such as behavioural activation and identifying  
29 and refuting unhelpful automatic thoughts and cognitive distortions, goal setting, goal review,  
30 agreeing on behavioural contracts, setting graded tasks, planning social support, action  
31 planning, weighing of pros and cons, preparing for/dealing with setbacks, self-motivational  
32 statements, constructing if-then plans and formulating implementation intentions and positive  
33 emotion induction are incorporated throughout. Mental imagery exercises and  
34 mindfulness/acceptance exercises are integrated both in text format and as audio recording.  
35 Furthermore, EBPI, autonomy supportive intervention concepts based on self-determination  
36 theory (26), the principles of responsiveness (27) and individual content-tailoring (28, 29) are  
37 crucial components of the intervention format. The programme specifically attempts to avoid  
38 fear appeals and simple information provision (e.g. ‘lecturing’). The programme does not  
39 provide drug specific information about available immunotherapies. The programme aims to  
40 translate evidence in the MS treatment and lifestyle management area in order to illustrate that  
41 decisions can be made. It follows the concept that every PwMS can develop an individual  
42 approach towards the disease, which might be a targeted immunotherapy initiation in one case  
43 or the development of a sophisticated food concept in the other.  
44  
45  
46  
47  
48  
49

50 The system is based on the AI-based software platform broca<sup>®</sup>, which is the basis for several  
51 effective therapy support systems evaluated in earlier RCTs, e.g. (16, 23, 30-32). An optional  
52 email and SMS reminder system (e.g. with lifestyle-related stimuli or reminders regarding  
53 programme usage and newly activated modules) aims to enhance involvement. Usage of the IG  
54 programme will be monitored biweekly and reacted on after four weeks of non-usage to ensure  
55 patient adherence.  
56  
57

58 The programme is designed as a highly individualized, dialogue-based system that provides  
59 PwMS with narrative and coordinated information based on their existing health beliefs,  
60 interests, etc. Each text passage ends with a set of pre-programmed response options in

multiple-choice format reflecting possible reader's feedback, such as "Yes. That makes sense." or "I do not quite understand this yet." The participant is invited to tick the matching response and will be guided to the next page referring to the choice, e.g. "I'm glad that you can understand it." or "No problem. Then let me explain it in a little more detail." More precisely, disease management and lifestyle techniques as well as exercises will be taught in sequentially active interactive learning units ("simulated dialogues") focusing on the following topics:

1. Diagnosis, prognosis and immunotherapy decision making
2. Support in coping
3. Techniques for coping with stress / depressive symptoms and developing positive emotions
4. Optimisation of dietary behaviour
5. Optimisation of physical activity behaviour
6. Sleep hygiene and methods for dealing with insomnia

The modules are not ordered by priority. Altogether, the IG programme will consist of 16 modules and accompany each participant over a period of 12 months with initial 2-3 weekly modules, later only weekly reminders and modules every 2 weeks and booster sessions in the end.

#### *Control group (CG): Information from self-help societies*

CG participants will receive access to an information platform with optimised standard care consisting of information compiled from DMSG information material to reflect current practice. It will also accompany participants over a period of 12 months and cover similar topics as in the IG. A reminder function as well as usage monitoring and adherence promotion will be applied as in the IG.

#### **Patient and public involvement**

PwMS were involved in the development phase of the intervention and also participated in the feasibility and piloting testing of the IG programme (see "Study design"). They were given access to the programme and invited to evaluate content, practicability, user-friendliness and comprehensibility of the programme, also considering the needs of newly diagnosed PwMS. The programme was revised based on the acquired feedback (e.g. technical adjustments, inclusion of more break possibilities and a progress bar in the modules). In addition, suggestions for prospective adjustments, which were not possible due to technical limitations, such as the embedding of video material, were gathered. Details regarding the feedback and resulting programme changes will be communicated in a separate publication.

#### **Criteria for discontinuation and relevant concomitant care**

In case of new events (relapse or T2 lesion), formally the primary endpoint will be reached. However, study participants will be asked to stay in the study. Immunotherapy may be started during the trial period. Immunotherapy type, use, and adherence rates will be collected during the clinical visits throughout the study.

#### **Outcomes**

Data will be collected over a period of 12 months, with a flexible follow-up of up to 24 months in early recruited PwMS. A list of outcomes including measurement time points is provided in Table 1.

| Instrument                 | Measurement time points |       |       |       |       |       |         |         |       |
|----------------------------|-------------------------|-------|-------|-------|-------|-------|---------|---------|-------|
|                            | $t_{-1}$                | $t_0$ | $V_1$ | $V_2$ | $V_3$ | $V_4$ | $V_5^*$ | $V_6^*$ | $t_x$ |
| Month                      | -1                      | 0     | 1     | 3     | 6     | 12    | 18*     | 24*     | X     |
| Eligibility screen         | X                       |       |       |       |       |       |         |         |       |
| Informed consent           | X                       |       |       |       |       |       |         |         |       |
| Demographic data           | X                       |       |       |       |       |       |         |         |       |
| MRI                        |                         | X     |       | X     | X     | X     | X       | X       |       |
| Clinical visit             |                         | X     | X     | X     | X     | X     | X       | X       |       |
| Relapse history            |                         | X     | X     | X     | X     | X     | X       | X       | X     |
| Immunotherapy status       |                         | X     | X     | X     | X     | X     | X       | X       | X     |
| EDSS                       |                         | X     |       |       |       | X     |         |         |       |
| RIKNO10                    |                         |       |       | X     |       |       |         |         |       |
| CPS                        |                         |       |       |       |       | X     |         |         | X     |
| Decision satisfaction      |                         |       |       |       |       |       |         |         | X     |
| Patient activation         |                         | X     |       |       |       | X     |         |         |       |
| Emotional coping           |                         | X     |       |       |       | X     |         |         |       |
| Changes in empowerment     |                         |       |       |       |       | X     |         |         |       |
| Expectancy                 |                         |       | X     |       |       |       |         |         |       |
| Readiness to change        |                         | X     |       | X     |       | X     |         |         |       |
| HAQUAMS                    |                         | X     |       |       |       | X     |         |         |       |
| EQ-5D-5L                   |                         | X     |       |       | X     | X     | X       | X       |       |
| HADS                       |                         | X     |       |       |       | X     |         |         |       |
| GLTEQ                      |                         | X     |       |       |       | X     |         |         |       |
| BSA                        |                         | X     |       |       |       | X     |         |         |       |
| QHOD2                      |                         | X     |       | X     |       | X     |         |         |       |
| myfood24                   |                         | X     |       |       |       | X     |         |         |       |
| Process evaluation         | X                       | X     | X     | X     | X     | X     | X       | X       |       |
| Health economic parameters |                         | X     |       |       | X     | X     | X       | X       |       |

$t_{-1}$  = before enrolment;  $t_0$  = before allocation;  $V_1 - V_6$  = post allocation ( $V_1$  = Visit in month 1;  $V_2$  = Visit in month 3;  $V_3$  = Visit in month 6;  $V_4$  = Visit in month 12;  $V_5$  = Visit in month 18;  $V_6$  = Visit in month 24); \* = only in early recruited PwMS;  $t_x$  = after reaching the primary endpoint.

BSA: Bewegungs- und Sportaktivität Fragebogen (Physical Activity, Exercise, and Sport Questionnaire); CPS: Control Preference Scale; EDSS: Expanded Disability Status Scale; GLTEQ: Godin Leisure-Time Exercise Questionnaire; HADS: Hospital Anxiety and Depression Scale; HAPA: Health Action Process Approach; HAQUAMS: Hamburg Quality of Life in MS Scale; MRI: Magnetic Resonance Imaging; QHOD2: Questionnaire of Healthy Diet; RIKNO: Risk Knowledge in Relapsing Multiple Sclerosis.



Table 1: Assessments and measurement time points

*Primary outcome*

The primary endpoint is the time to a new relapse or, as a surrogate for inflammatory disease activity, a new lesion on T2-weighted images on MRI scans, whatever first occurs. Occurrence of new T2 lesions will be assessed according to an MRI protocol (Localizer, 3D FLAIR sagittal e.g. 3x3mm, 3D image T1w native sagittal, 1-3mm, PD/T2w axial 3mm, protocol duration approx. 20 min.). MRI scans will be read centrally by an experienced rater, blinded to subject identity and group assignment.

Relapses will be clinically evaluated by participating neurologists. In case of a relapse, duration of complaints/impairment, relapse symptoms (worsened or newly occurred), degree of impairment due to the relapse and the degree of certainty with regard to the classification of the worsening as a relapse will be assessed.

*Secondary outcomes*

To assess risk knowledge, an abbreviated 10-item version of the MS risk knowledge questionnaire (RIKNO 2.0 (33)) will be used.

As a surrogate of decision quality, preferred and realized role preference in decision discussions for or against immunotherapy based on the Control Preference Scale (CPS) (34) will be assessed. Immunotherapy status will be assessed to determine whether an immunotherapy was newly started, aborted or changed.

The extent of patient activation (i.e. expressed in the confidence and knowledge to take action, as well as actually taking health-related action) based on the Patient Activation Measure, PAM (35) and the coping capability, based on two items (item 10 and 24) of the coping self-efficacy scale, CSES (36) will be measured. In addition, patient expectancies based on items 1-3 of the credibility/expectancy questionnaire (37) will be assessed. Based on principles of the Health Action Process Approach, HAPA (38), readiness to change (39) will be estimated in order to determine the interventions impact on willingness to change lifestyle habits. Moreover, changes in perceived empowerment (based on (40), items 1, 3 and 4) will be measured.

Impairment in the Expanded Disability Status Scale (EDSS) (41) will be determined by the treating neurologist.

Ideally, the lifestyle intervention leads to more general satisfaction with life but may also alleviate symptoms such as depression, anxiety, fatigue. Quality of life will be measured with the Hamburg Quality of Life in MS Scale, HAQUAMS (42) and the generic EQ-5D-5L (43). The Hospital anxiety and distress scale, HADS (44) will be used as a measures for depression and anxiety.

Physical activity behaviour will be measured with the Godin Leisure-Time Exercise Questionnaire (GLTEQ) (45) and the Physical Activity, Exercise, and Sport Questionnaire (Bewegungs- und Sportaktivität (BSA)) (46).

The Questionnaire of Healthy Diet (QHOD2), an adapted version of the Mediterranean Diet Screener (aMDS) as used in (47) that was developed by the German Institute of Human Nutrition (DIfE), will be used to measure the frequency of intake of characteristic food groups

1  
2  
3 in the last seven days. To provide nutrient intake data, the 24-h dietary recall myfood24 (48)  
4 will be used, in each case three times within a time period of two to three weeks (two weekdays,  
5 one weekend day).  
6

### 7 *Health economic outcomes*

8

9 Health economic parameters will be assessed to determine the efficiency of the intervention by  
10 comparing the cost and outcome of the IG to the CG. All direct costs associated with the  
11 intervention as well as costs resulting from the consumption of health-related goods and  
12 services (49) and indirect costs due to productivity losses will be considered from the  
13 perspective of the German statutory health insurance and the society.

14 To determine efficiency of the intervention, a cost-effectiveness analysis will be performed in  
15 terms of additional costs per additional relapse or T2 lesion (clinical endpoint) averted and a  
16 cost-utility analysis, which aims to calculate the additional costs required for an additional  
17 improvement in quality-adjusted life years (QALYs). Incremental cost-effectiveness ratio and  
18 incremental cost-utility ratio will be calculated as the ratio of the difference in mean costs and  
19 difference in mean outcomes between IG and CG. QALYs will be measured by a well-  
20 established preference based quality of life instrument (EQ-5D-5L) and evaluated by a German  
21 tariff to generate utilities (43). A standardised instrument (50) will be used to record the  
22 healthcare consumption of study participants focusing mainly on outpatient doctor visits, visits  
23 to other health service providers, sick days, hospital stays and MS immune medication.  
24 Productivity losses will be estimated using the human capital approach (51). 95% confidence  
25 intervals for the outcome of the analyses will be determined non-parametrically based on the  
26 distribution characteristics of costs using bootstrap procedures (52). Univariate and  
27 probabilistic sensitivity analyses will be performed and cost-effectiveness acceptance curves  
28 will be executed to take into account uncertainty (53).  
29  
30  
31  
32  
33

### 34 **Participant timeline**

35 The time schedule is depicted in Figure 1.

36  
37  
38 *Figure 1: Participant timeline*  
39

### 40 **Sample size**

41  
42 Based on effect sizes resulting from an RCT for a stress management intervention (13) as well  
43 as data from cohorts on lesion development after an initial clinical event ((54), personal  
44 communication Michael Scheel, Charité Berlin), one event (relapse or at least one new T2  
45 lesion) is expected in every second PwMS within 12 months in the CG. 100 events result in a  
46 statistical power of 85% for a two-way significance level test of 5% and an assumed hazard  
47 ratio of 0.55, i.e. a reduction of 45% by IG compared to the CG. Thus, with a mean observation  
48 time of 12 months, the 100 events required can be expected to be observed in 262 PwMS (131  
49 per group). Assuming about 20% dropouts over one year, 328 PwMS will be randomised (164  
50 per group, 20% dropout = 33 = 131 per group). A sample size recalculation will be performed  
51 after 12 months to review the assumptions on event rates and dropouts (55). If necessary, the  
52 number of cases will be increased to a maximum of 450 PwMS.  
53  
54  
55

### 56 **Recruitment**

57  
58 Eligible MS centres will be recruited by the coordinating centre in Hamburg (University  
59 Medical Center Hamburg-Eppendorf, UKE). Recruitment and inclusion of PwMS will take  
60

1  
2  
3 place in the participating MS centres through neurologists. In addition, POWER@MS1 will be  
4 advertised on the website of the DMSG. Overall, a recruitment period of 12 months is assumed  
5 with approx. 20 PwMS per centre, with one to two PwMS per month. Reasons for rejection will  
6 be documented.  
7

### 8 **Allocation**

9  
10 Group assignment will be undertaken externally and in a concealed manner through the  
11 electronic data capture system secuTrial® to prevent any manipulation of persons involved in  
12 the study. Eligible study participants will be randomised into the IG or to the CG in blocks (1:1  
13 allocation ratio) through a computer-generated system in secuTrial®. After baseline  
14 documentation and subsequent randomisation, PwMS will be provided with access (login)  
15 details to the IG or CG programme by an unblinded member of the study team.  
16  
17

### 18 **Blinding**

19  
20 The study will be conducted as an investigator blinded trial and participating MS centres will  
21 not be provided with any information about group assignment of a given PwMS. Blinding of  
22 the trial participants is pursued, but only possible to a limited extent. Participants and  
23 neurologists might realize their participation in the IG during encounters.  
24  
25

### 26 **Data collection methods**

27  
28 Data will be obtained at different time points using paper-based and web-based questionnaires  
29 (see Table 1). In case of missing data, participants will be contacted by a member of the UKE.  
30 All study relevant data will be entered into secuTrial® and provided online. Results of MRI  
31 scans (image data) will be saved on CD and sent to the study centre by mail. They will be  
32 quality-checked, pseudonymised and uploaded in a protected reading centre database. Data  
33 obtained with regard to nutrition behaviour will be collected via secured online-platforms of  
34 the Humanstudienzentrum of the DiE and Dietary Assessment Limited (University of Leeds  
35 spinout company), which act in accordance with EU General Data Protection Regulation  
36 (Datenschutz-Grundverordnung, DSGVO). Data obtained through myfood24 will be stored on  
37 a server in the Netherlands, with a backup in the UK. After data collection, data will be  
38 transferred to secuTrial® and connected with the existing datasets. In addition, usage of the  
39 web-based programmes will be monitored.  
40  
41  
42

### 43 **Data management**

44  
45 The IG and CG programme will be provided via a secure online platform that meets all legal  
46 requirements (SSL Encryption). All study data will be used and evaluated pseudonymously.  
47 However, all participating MS centres will have a list with names and assigned pseudonyms.  
48 All electronic and paper-based data material will be stored at the UKE for a maximum period  
49 of ten years and will be destroyed subsequently. Stored CDs containing MRI images will be  
50 destroyed directly after analysis of the study data. In case of withdrawn consent, pseudonymised  
51 data will be anonymised. A deletion of already anonymized data is not possible.  
52  
53  
54

### 55 **Statistical methods**

56  
57 The effect on the primary endpoint will be estimated in a Cox proportional hazards regression  
58 that, in addition to treatment, also includes study centre as a factor; it will be reported as hazard  
59 ratio (HR) with 95% confidence interval and p-value testing the null hypothesis  $H_0: HR=1$ .  
60

1  
2  
3 Kaplan-Meier curves of the primary endpoint for both groups will be used to illustrate the  
4 treatment effect.  
5

6 Secondary endpoints will be analysed using mean comparisons between IG and CG with  
7 adjustment for the baseline assessments and centre in analysis of covariance (ANCOVA)  
8 models. Least squares group differences will be reported with 95% confidence intervals and p-  
9 values testing the null hypothesis of no intervention effect. The number of portions/day or week  
10 for different food groups will be analysed, evaluated and compared to current  
11 recommendations. Data obtained through the 24h recall (myfood24) will be used to analyse  
12 intake of selected nutrients of interest comparing mean changes in intake from baseline to post  
13 intervention between IG and CG, adjusting for baseline intake. MRI lesion counts will be  
14 analysed using negative binomial regression models adjusting for baseline MRI and centre.  
15 Adverse events will be summarized as frequencies and percentages by treatment group.  
16  
17  
18

19 In addition, subgroup and moderator variable analysis is planned to be performed (e.g. early  
20 therapy vs no therapy and women vs men).  
21

22 Reasons for study withdrawal will be reported. In case of missing data, all PwMS will be  
23 analysed in the group they were randomised to (intention-to-treat analysis). Early study  
24 discontinuations will be treated as independent right censoring in the primary analysis. In case  
25 of substantial or differential study discontinuations, the validity of the independent censoring  
26 assumption will be explored in shared random effects models of the primary endpoint and time  
27 to study discontinuation. To handle missing data in baseline variables or follow-up assessments,  
28 multiple imputation models will be applied.  
29  
30  
31

32 All details of the statistical analyses including definitions of analysis populations will be  
33 prespecified in a statistical analysis plan.  
34

### 35 **Monitoring**

36  
37 As part of a risk-based quality management, external independent data monitoring including  
38 onsite visits at the UKE and remote data checks in secuTrial® will be performed by the contract  
39 research organization CTC North GmbH & Co. KG.  
40

### 41 **Safety and adverse events**

42  
43 As no significant harms (side effects, risks or complications) are to be expected, no stopping  
44 guidelines are planned. The performance of six MRIs over two years is close to clinical standard  
45 and can be regarded as harmless. Contrast media will not be used in order to minimize the risk  
46 of possible contrast media deposition in the basal ganglia, although no information on  
47 depositions is available for the contrast media currently used (56). No auditing trials are planned  
48 or expected.  
49  
50

## 51 **ETHICS AND DISSEMINATION**

52  
53 The study has been approved by the Ethics Committee of the Hamburg Chamber of Physicians  
54 (PV6015) and the ethics committees of participating study centres. The trial was registered at  
55 ClinicalTrials.gov (NCT03968172).  
56

57 Informed consent (see Appendix II) will be obtained by the participating MS centres and a copy  
58 will be sent to the study centre in Hamburg. Participants may withdraw their consent at any  
59 time. A financial compensation for participation in this study cannot be granted. In case of  
60

1  
2  
3 reaching the primary endpoint, PwMS are requested to remain in the study and continued access  
4 to the web tools will be guaranteed until the study end. Only the study team (investigators) and  
5 Alexander Stahmann (medical information scientist at the German MS Registry) will have  
6 access to the final trial dataset. For publications, an anonymized data set will be used. If  
7 possible, an anonymized data set will be made available in the publication process in order to  
8 disseminate the study results.  
9

10  
11 Trial results will be communicated at scientific conferences and meetings (e.g. at the yearly  
12 German Neurologists Society, the RIMS network) by the investigators and presented on the  
13 DMSG website and other relevant patient websites. Authorship will be shared between persons  
14 involved in the study following the current guidelines of the International Committee of  
15 Medical Journal Editors (ICMJE). Professional writers and persons not directly involved in the  
16 study will not be granted authorship.  
17  
18

## 19 **DISCUSSION**

20  
21 This will be the first study assessing the impact of a lifestyle management programme combined  
22 with EBPI on inflammatory activity in MS. If successful, POWER@MS1 has a paradigm  
23 shifting potential. If successful, the trial could give lifestyle management a label as putative  
24 disease-modifying. This can impact guideline development.  
25  
26

### 27 **Current trial status**

28  
29 Recruitment of PwMS has started in July 2019.  
30

31 **Abbreviations** aMDS: adapted Mediterranean Diet Screener; BSA: Bewegungs- und  
32 Sportaktivität Fragebogen (Physical Activity, Exercise, and Sport Questionnaire); CBT:  
33 cognitive behavioural therapy; CG: control group; CIS: clinically isolated syndrome; CNS:  
34 central nervous system; CPS: Control Preference Scale; CSES: Coping Self-efficacy Scale;  
35 DiFe: Deutsches Institut für Ernährungsforschung (German Institute of Human Nutrition);  
36 DMSG: Deutsche Multiple Sklerose Gesellschaft (German Multiple Sclerosis Society);  
37 DSGVO: Datenschutz-Grundverordnung; EBBC: evidence-based behaviour change; EBPI:  
38 evidence-based patient information; EDSS: Expanded-Disability-Status-Scale; GLTEQ: Godin  
39 Leisure-Time Exercise Questionnaire; HADS: Hospital Anxiety and Depression Scale; HAPA:  
40 Health Action Process Approach; HAQUAMS: Hamburg Quality of Life in MS Scale; ICER:  
41 incremental cost-effectiveness ratio; HR: hazard ratio; ICMJE: International Committee of  
42 Medical Journal Editors; ICUR: incremental cost-utility ratio; IG: intervention group; MRC:  
43 Medical Research Council; MRI: magnetic resonance imaging; MS: multiple sclerosis; PAM:  
44 Patient Activation Measure; QALY: quality-adjusted life year; PwMS: persons with multiple  
45 sclerosis; RCT: randomised controlled trial; UKE: Universitätsklinikum Hamburg-Eppendorf  
46 (University Medical Center Hamburg-Eppendorf)  
47  
48  
49

50  
51 **Contributors** CH is the principal investigator and led the planning and development of the full  
52 study with support from NK, KRL, TS, AR, JP, JS, SK, TF, SMG and HT. NK and CH wrote  
53 the first draft of the paper. TF specifically revised the statistical analyses sections of this paper.  
54 AI provided health economic expertise. MVDL contributed as a PwMS expert. All authors  
55 conceived the study, revised the manuscript for relevant scientific content, and approved the  
56 final version.  
57  
58  
59  
60

1  
2  
3 **Funding** This investigator initiated study is publicly funded by the Innovationsfonds,  
4 Innovationsausschuss beim Gemeinsamen Bundesausschuss, Wegelystraße 8, 10623 Berlin,  
5 Germany (01VSF17015). The funding body is not involved in any study related aspect.  
6

7 **Competing interests** CH has received research grants, speaker honoraria and travel grants from  
8 Biogen, Celgene, Genzyme, Merck, Roche. JPS receives research funding from Deutsche  
9 Forschungsgemeinschaft and reports grants from Biogen and Genzyme outside the submitted  
10 work. TF reports personnel fees from Bayer, BiosenseWebster, Boehringer Ingelheim, CSL  
11 Behring, Daiichi Sankyo, Enanta, Fresenius Kabi, Galapagos, Immunic, Janssen, LivaNova,  
12 Novartis, Relaxera, Roche, and Vifor; all outside this work.  
13  
14

15 **Patient consent** Not required.  
16

17 **Ethics approval and trial registration** The study has been approved by the Ethics Committee  
18 of the Hamburg Chamber of Physicians (PV6015) and all relevant local ethics boards. The trial  
19 was prospectively registered at Clinicaltrials.gov (NCT03968172). Important and major  
20 protocol modifications and amendments will have to be approved and reported to all relevant  
21 ethical committees. In addition, all changes will be noted in the study registration.  
22  
23

24 **Provenance and peer review** Not commissioned; externally peer reviewed.  
25

26 **Open Access** This is an Open Access article distributed in accordance with the Creative  
27 Commons Attribution Non Commercial (CC BY-NC 4.0) license, which permits others to  
28 distribute, remix, adapt, build upon this work non-commercially, and license their derivative  
29 works on different terms, provided the original work is properly cited and the use is non-  
30 commercial. See: <http://creativecommons.org/licenses/by-nc/4.0/>  
31  
32  
33  
34  
35  
36  
37  
38  
39  
40  
41  
42  
43  
44  
45  
46  
47  
48  
49  
50  
51  
52  
53  
54  
55  
56  
57  
58  
59  
60

## REFERENCES

1. Petersen G, Wittmann R, Arndt V, Gopffarth D. [Epidemiology of multiple sclerosis in Germany: regional differences and drug prescription in the claims data of the statutory health insurance]. *Nervenarzt*. 2014;85(8):990-8.
2. Thompson AJ, Banwell BL, Barkhof F, Carroll WM, Coetzee T, Comi G, et al. Diagnosis of multiple sclerosis: 2017 revisions of the McDonald criteria. *Lancet Neurol*. 2018;17(2):162-73.
3. Rahn AC, Köpke S, Schiffmann I, Stellmann JP, Mühlhauser I, Lukas C, et al. Magnetic resonance imaging as a prognostic disability marker in clinically isolated syndromes: A systematic review. *Acta Neurologica Scandinavica*. 2018;139(2).
4. Chalfant AM, Bryant RA, Fulcher G. Posttraumatic stress disorder following diagnosis of multiple sclerosis. *Journal of traumatic stress*. 2004;17(5):423-8.
5. Tramacere I, Del Giovane C, Salanti G, D'Amico R, Filippini G. Immunomodulators and immunosuppressants for relapsing-remitting multiple sclerosis: a network meta-analysis. *Cochrane Database Syst Rev*. 2015(9):Cd011381.
6. Filippini G, Del Giovane C, Clerico M, Beiki O, Mattoscio M, Piazza F, et al. Treatment with disease-modifying drugs for people with a first clinical attack suggestive of multiple sclerosis. *Cochrane Database Syst Rev*. 2017;4:Cd012200.
7. Gold R. Diagnose und Therapie der Multiplen Sklerose: Deutsche Gesellschaft für Neurologie; 2015 [Available from: <https://www.dgn.org/leitlinien/2333-II-31-2012-diagnose-und-therapie-der-multiplen-sklerose>].
8. Hansen K, Schüssel K, Kieble M, Werning J, Schulz M, Friis R, et al. Adherence to Disease Modifying Drugs among Patients with Multiple Sclerosis in Germany: A Retrospective Cohort Study. *PloS one*. 2015;10(7):e0133279.
9. Artemiades AK, Anagnostouli MC, Alexopoulos EC. Stress as a risk factor for multiple sclerosis onset or relapse: a systematic review. *Neuroepidemiology*. 2011;36(2):162-73.
10. Marrie RA, Leung S, Tyry T, Cutter GR, Fox R, Salter A. Use of eHealth and mHealth technology by persons with multiple sclerosis. *Mult Scler Relat Disord*. 2018;27:13-9.
11. Beckett JM, Bird ML, Pittaway JK, Ahuja KD. Diet and Multiple Sclerosis: Scoping Review of Web-Based Recommendations. *Interact J Med Res*. 2019;8(1).
12. Ngandu T, Lehtisalo J, Solomon A, Levälähti E, Ahtiluoto S, Antikainen R, et al. A 2 year multidomain intervention of diet, exercise, cognitive training, and vascular risk monitoring versus control to prevent cognitive decline in at-risk elderly people (FINGER): a randomised controlled trial. *The Lancet*. 2015;385(9984):2255-63.
13. Mohr DC, Lovera J, Brown T, Cohen B, Neylan T, Henry R, et al. A randomized trial of stress management for the prevention of new brain lesions in MS. *Neurology*. 2012;79(5):412-9.
14. Köpke S, al. e. Information provision for people with multiple sclerosis. *Cochrane Database of Systematic Reviews*. 2018;10(9).
15. Motl RW, Hubbard EA, Bollaert RE, Adamson BC, Kinnett-Hopkins D, Balto JM, et al. Randomized controlled trial of an e-learning designed behavioral intervention for increasing physical activity behavior in multiple sclerosis. *Multiple Sclerosis Journal - Experimental, Translational and Clinical*. 2017;Oct;3(4):2055217317734886.
16. Fischer A, Schroder J, Vettorazzi E, Wolf OT, Pottgen J, Lau S, et al. An online programme to reduce depression in patients with multiple sclerosis: a randomised controlled trial. *Lancet Psychiatry*. 2015;2(3):217-23.
17. Pöttgen J, Lau S, Penner I, Heesen C, Moritz S. Managing Neuropsychological Impairment in Multiple Sclerosis. *International Journal of MS Care*. 2015;17(3):130-7.
18. Craig P, Dieppe P, Macintyre S, Michie S, Nazareth I, Petticrew M. Developing and evaluating complex interventions: the new Medical Research Council guidance. *Int J Nurs Stud*. 2013;50(5):587-92.
19. Michie S, Van Stralen MM, West R. The behaviour change wheel: A new method for characterising and designing behaviour change interventions. *Implement Sci*. 2011;6:42.
20. Michie S, Ashford S, Sniehotta FF, Dombrowski SU, Bishop A, French DP. A refined taxonomy of behaviour change techniques to help people change their physical activity and healthy eating behaviours: the CALO-RE taxonomy. *Psychol Health*. 2011;26(11):1479-98.

21. Cane J, O'Connor D, Michie S. Validation of the theoretical domains framework for use in behaviour change and implementation research. *Implement Sci.* 2012;7:37.
22. Werbrouck A, al. e. How to empower patients? A systematic review and meta-analysis. *Translational behavioral medicine.*8:660-74.
23. Twomey C, O'Reilly G, Meyer B. Effectiveness of an individually-tailored computerised CBT programme (Deprexis) for depression: A meta-analysis. *PSYCHIATRY RESEARCH.* 2017;256:371-7.
24. Samdal GB, Eide GE, Barth T, Williams G, Meland E. Effective behaviour change techniques for physical activity and healthy eating in overweight and obese adults; systematic review and meta-regression analyses. *Int J Behav Nutr Phys Act.* 2017;14(1):42.
25. Cavanagh K, Strauss C, Forder L, Jones F. Can mindfulness and acceptance be learnt by self-help?: a systematic review and meta-analysis of mindfulness and acceptance-based self-help interventions. *Clin Psychol Rev.* 2014;34(2):118-29.
26. Fortier MS, Duda J, Guerin E, Teixeira PJ. Promoting physical activity: development and testing of self-determination theory-based interventions. *International Journal of Behavioral Nutrition and Physical Activity.* 2012;9(1):20.
27. Kramer U, Stiles WB. The responsiveness problem in psychotherapy: A review of proposed solutions. *Clinical Psychology: Science and Practice.* 2015;22(3):277-95.
28. Krebs P, Prochaska JO, Rossi JS. A meta-analysis of computer-tailored interventions for health behavior change. *Prev Med.* 2010;51(3-4):214-21.
29. Hawkins RP, Kreuter M, Resnicow K, Fishbein M, Dijkstra A. Understanding tailoring in communicating about health. *Health Educ Res.* 2008;23(3):454-66.
30. Pöttgen J, Moss-Morris R, Wendebourg JM, Feddersen L, Gold SM, Penner IK, et al. Online fatigue management program for patients with multiple sclerosis - a randomized controlled trial. *Mult Scler.* 2015;21(S11):41-2.
31. Zill JM, Meyer B, Topp J, Daubmann A, Harter M, Dirmaier J. Vorvida: study protocol of a randomized controlled trial testing the effectiveness of internet-based self-help program for the reduction of alcohol consumption for adults. *BMC Psychiatry.* 2016;16:19.
32. Berger T, Urech A, Krieger T, Stolz T, Schulz A, Vincent A, et al. Effects of a transdiagnostic unguided Internet intervention ("velibra") for anxiety disorders in primary care: Results of a randomised controlled trial. *Psychological Medicine.* 2017;47(1):67-80.
33. Heesen C, al. e. What should a person with relapsing-remitting multiple sclerosis know? –Focus group and survey data of a risk knowledge questionnaire (RIKNO 2.0). *Mult Scler Relat Disord.* 2017;18:186-95.
34. Degner LF, Sloan JA, Venkatesh P. The Control Preferences Scale. *Can J Nurs Res.* 1997;29(3):21-43.
35. Hibbard J, Stockard J, R Mahoney E, Tusler M. Development of the Patient Activation Measure (PAM): Conceptualizing and Measuring Activation in Patients and Consumers2004. 1005-26 p.
36. Chesney MA, Neilands TB, Chambers DB, Taylor JM, Folkman S. A validity and reliability study of the coping self-efficacy scale. *British journal of health psychology.* 2006;11(Pt 3):421-37.
37. Devilly GJ, Borkovec TD. Psychometric properties of the credibility/expectancy questionnaire. *Journal of behavior therapy and experimental psychiatry.* 2000;31(2):73-86.
38. Schwarzer R, Lippke S, Luszczynska A. Mechanisms of health behavior change in persons with chronic illness or disability: The Health Action Process Approach (HAPA). *Rehabilitation psychology.* 2011;56(3):161-70.
39. Lippke S, Ziegelmann JP, Schwarzer R, Velicer WF. Validity of stage assessment in the adoption and maintenance of physical activity and fruit and vegetable consumption. *Health Psychology & Behavioral Medicine.* 2009;28(2): 183-93.
40. Bann C, Sirois F, Walsh E. Provider Support in Complementary and Alternative Medicine: Exploring the Role of Patient Empowerment2010. 745-52 p.
41. Kurtzke JF. Rating neurologic impairment in multiple sclerosis: an expanded disability status scale (EDSS). *Neurology.* 1983;33(11):1444-52.
42. Gold SM, Heesen C, Schulz H, Guder U, Monch A, Gbadamosi J, et al. Disease specific quality of life instruments in multiple sclerosis: validation of the Hamburg Quality of Life Questionnaire in Multiple Sclerosis (HAQUAMS). *Mult Scler.* 2001;7(2):119-30.



- 1
- 2
- 3 43. Herdman M, Gudex C, Lloyd A, Janssen M, Kind P, Parkin D, et al. Development and
- 4 preliminary testing of the new five-level version of EQ-5D (EQ-5D-5L). *Qual Life Res.*
- 5 2011;20(10):1727-36.
- 6 44. Zigmond AS, Snaith RP. The hospital anxiety and depression scale. *Acta Psychiatr Scand.*
- 7 1983;67(6):361-70.
- 8 45. Shephard R. Godin leisure-time exercise questionnaire. *Med Sci Sports Exerc.* 1997;29(suppl
- 9 6):S36-S8.
- 10 46. Fuchs R, Klaperski S, Gerber M, Seelig H. Messung der Bewegungs- und Sportaktivität mit
- 11 dem BSA-Fragebogen. *Zeitschrift für Gesundheitspsychologie.* 2015;23(2):60-76.
- 12 47. Estruch R, Ros E, Salas-Salvado J, Covas MI, Corella D, Aros F, et al. Primary Prevention of
- 13 Cardiovascular Disease with a Mediterranean Diet Supplemented with Extra-Virgin Olive Oil or Nuts.
- 14 *N Engl J Med.* 2018;378(25):e34.
- 15 48. Wark PA, Hardie LJ, Frost GS, Alwan NA, Carter M, Elliott P, et al. Validity of an online 24-
- 16 h recall tool (myfood24) for dietary assessment in population studies: comparison with biomarkers and
- 17 standard interviews. *BMC Med.* 2018;16(1):136.
- 18 49. Krauth C, Hessel FP, Hansmeier T, Wasem J, Seitz R, Schweiker B. Empirical standard costs
- 19 for health economic evaluation in Germany - a proposal by the working group methods in health
- 20 economic evaluation. *Gesundheitswesen.* 2005;67(10):736-46.
- 21 50. Chernyak N, Ernsting C, Icks A. Pre-test of questions on health-related resource use and
- 22 expenditure, using behaviour coding and cognitive interviewing techniques. *BMC Health Services*
- 23 *Research.* 2012;12:303.
- 24 51. Gold MR, Siegel JE, Russell LB, Weinstein MC. *Cost-effectiveness in health and medicine.*
- 25 *New York: Oxford University Press; 1996.*
- 26 52. Briggs AH, Wonderling DE, Mooney CZ. Pulling cost-effectiveness analysis up by its
- 27 bootstraps: a non-parametric approach to confidence interval estimation. *Health economics.*
- 28 1997;6(4):327-40.
- 29 53. Fenwick E, O'Brien BJ, Briggs A. Cost-effectiveness acceptability curves--facts, fallacies and
- 30 frequently asked questions. *Health economics.* 2004;13(5):405-15.
- 31 54. Rosenkranz SC, Kaulen B, Neuhaus A, Siemonsen S, Kopke S, Daumer M, et al. Low clinical
- 32 conversion rate in clinically isolated syndrome patients - diagnostic benefit of McDonald 2010 criteria?
- 33 *Eur J Neurol.* 2018;25(2):247-e9.
- 34 55. Friede T, Pohlmann H, Schmidli H. Blinded sample size reestimation in event-driven clinical
- 35 trials: Methods and an application in multiple sclerosis. *Pharmaceutical Statistics.* 2019;18:351-65.
- 36 56. Costa L, Bracco P, Vada S, Trossarelli L, Jacobson K. A chemical analysis of the clogging
- 37 process of polymeric biliary endoprostheses. *Biomaterials.* 2001;22(23):3113-9.
- 38
- 39
- 40
- 41
- 42
- 43
- 44
- 45
- 46
- 47
- 48
- 49
- 50
- 51
- 52
- 53
- 54
- 55
- 56
- 57
- 58
- 59
- 60

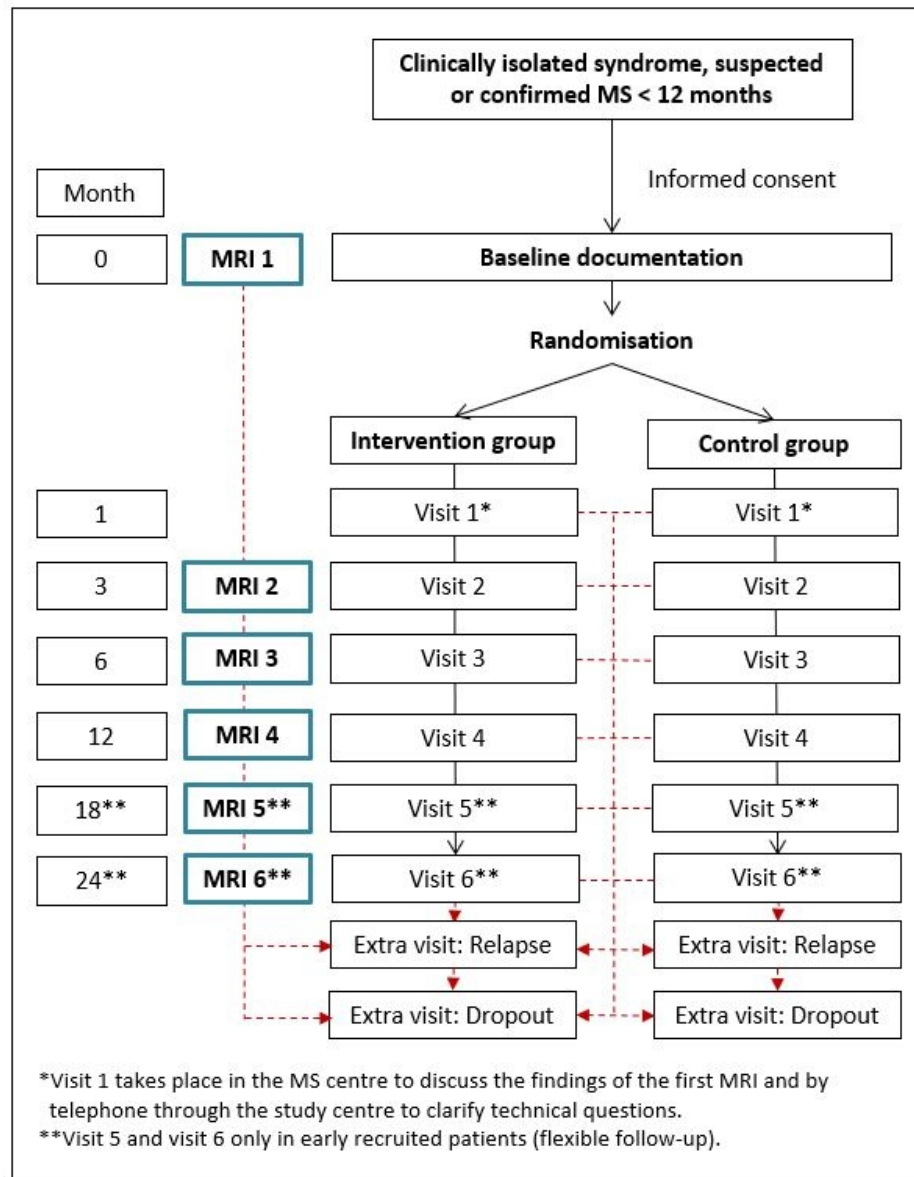

Figure 1: Participant timeline

106x135mm (144 x 144 DPI)

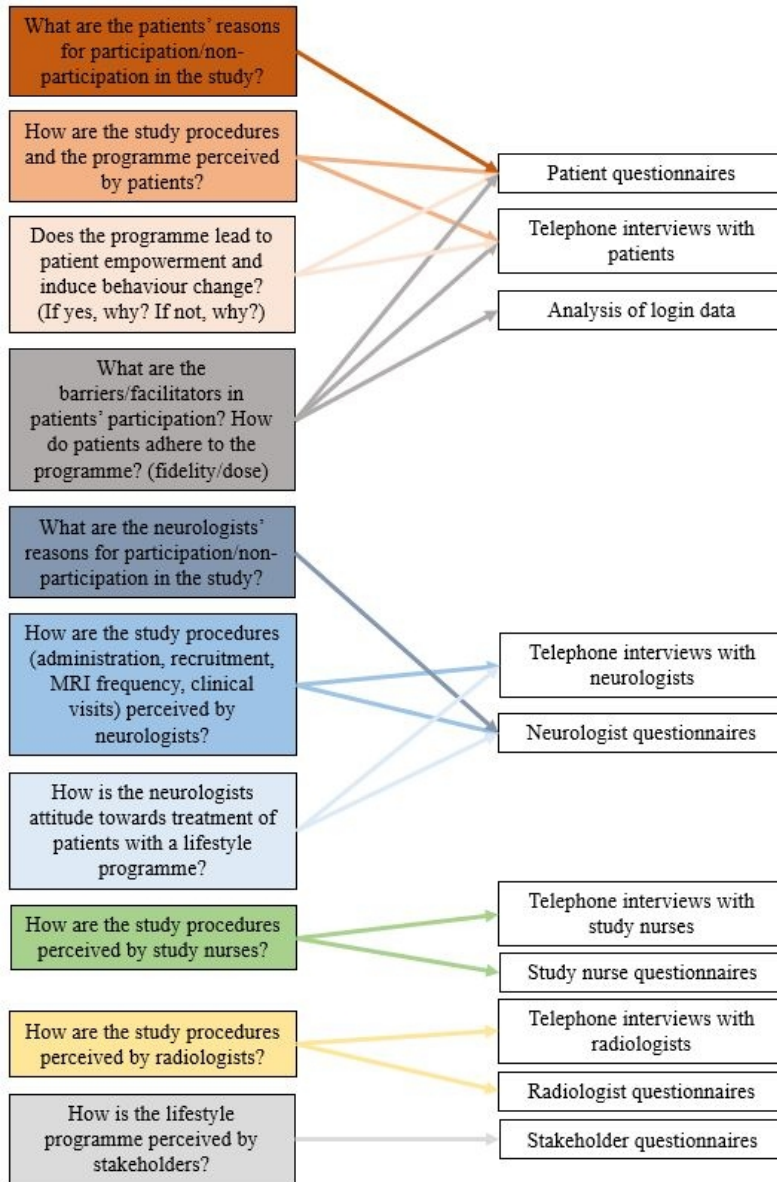

Figure 2: Process evaluation POWER@MS1: questions and methods

95x142mm (144 x 144 DPI)

## Appendix I: Process evaluation

A mixed methods approach (1) is used for the process evaluation based on standardised questionnaires and telephone interviews (see Table 2, Figure 2). Further, the outcome assessments of the main study are an important data source for the process evaluation. The process evaluation aims to clarify whether the intervention was delivered as intended (fidelity) and in which quantity (dose) the intervention was implemented (2, 3). Moreover, implementation barriers and facilitators will be explored. As shown in Table 2 and Figure 2, we will assess contextual factors, components associated with recruitment, delivery, responses and maintenance of centres and individuals (PwMS) as well as unintended consequences using different methods.

### *Sampling*

Questionnaires will be provided to all participants. Interviews will be performed with 10 to 20 with PwMS from each study group until information saturation is reached. Of the healthcare providers, up to 10 neurologists and 5 radiologists will be interviewed based on a purposeful sampling strategy, i.e. aiming for a diversity of centres in organisational structure and size.

### *Timing*

The process evaluation will be conducted in parallel to the main trial (see Table 2 for specific timing of assessments).

### *Data analysis*

First, the process evaluation and trial data will be analysed separately. Afterwards, data will be combined and used to determine post-trial interview questions. Quantitative process evaluation data (questionnaires and evaluation forms) will be analysed descriptively using SPSS (International Business Machines Corporation (IBM), Armonk, United States of America) or R (R Development Core Team) software. Subgroup analyses considering study outcomes and patient characteristics will be performed (for example, start of immunotherapy and decision type) in order to explore the impact of the intervention on different groups. Interviews will be analysed by thematic analysis (4) using MAXQDA (5).

### References:

1. Cresswell JW, Plano Clark VL. Designing and Conducting Mixed Methods Research. Sage Publications, Inc. 2010;2.
2. Moore GF, Audrey S, Barker M, Bond L, Bonell C, Hardeman W, et al. Process evaluation of complex interventions: Medical Research Council guidance. *Brit Med J.* 2015;350:h1258.
3. Craig P, Dieppe P, Macintyre S, Michie S, Nazareth I, Petticrew M, et al. Developing and evaluating complex interventions: the new Medical Research Council guidance. *Brit Med J.*
4. Braun V, Clarke V. What can "thematic analysis" offer health and wellbeing researchers? *International journal of qualitative studies on health and well-being.* 2014;9:26152.
5. Kuckartz U, Rädiker S. Analyse qualitativer Daten mit MAXQDA. Springer VS. 2019.

| Overview process evaluation POWER@MS1 |                                                                                                                                                                               |                                                                                                                                                                                                                            |                              |
|---------------------------------------|-------------------------------------------------------------------------------------------------------------------------------------------------------------------------------|----------------------------------------------------------------------------------------------------------------------------------------------------------------------------------------------------------------------------|------------------------------|
| Domain                                | Objects of investigation                                                                                                                                                      | Ascertainment/Data collection tool                                                                                                                                                                                         | Time point                   |
| Context                               | Context factors in Germany (health system)                                                                                                                                    | Description                                                                                                                                                                                                                | Pre-intervention             |
|                                       | Centre-specific structures and processes                                                                                                                                      | Questionnaire, interviews                                                                                                                                                                                                  | Pre-intervention             |
| Recruitment of centres                | Centre recruitment                                                                                                                                                            | Documentation of recruited centres, phone calls or visits in interested centres                                                                                                                                            | Pre-intervention             |
|                                       | Reason for study participation/ for non-participation (promoting factors and barriers)                                                                                        | Questionnaire (neurologists)                                                                                                                                                                                               | Pre- and during intervention |
| Delivery to centres                   | Delivery of information (study management) to neurologists, study nurses and radiologists (participation, reach)                                                              | Provision of study materials about the intervention programme, initiation of study centres                                                                                                                                 | Pre-intervention             |
|                                       | Delivery of the study monitoring platform access to all centres                                                                                                               | Provision of access data                                                                                                                                                                                                   | Pre-intervention             |
| Response of centres                   | Attitude (neurologists, study nurses and radiologists) regarding the study procedures (e.g. administration, recruitment, clinical visits, MRI frequency) and the intervention | Evaluation forms, interviews                                                                                                                                                                                               | During and post-intervention |
| Maintenance of centres                | Study centres: recruitment of patients                                                                                                                                        | Documentation of recruited patients, evaluation forms, interviews                                                                                                                                                          | During and post-intervention |
| Recruitment of individuals            | Recruitment of PwMS                                                                                                                                                           | Information video (provided online via YouTube and stakeholder websites/ social media/ network distributors/ magazines), study information leaflets, recruitment in the centres (screening lists, baseline questionnaires) | Pre-intervention             |
| Delivery to individuals               | <u>Intervention group</u> : delivery of the intervention to individuals (EBPI about lifestyle factors in MS combined with a complex behaviour change programme)               | Provision of access (login) data, e-mail and text message reminders, monitoring of programme usage, evaluation forms, interviews                                                                                           | During and post-intervention |

|                                                                                                                                                                                                                                                        |                                                                                                                                                                                                  |                                                                                                                                                           |                                                        |
|--------------------------------------------------------------------------------------------------------------------------------------------------------------------------------------------------------------------------------------------------------|--------------------------------------------------------------------------------------------------------------------------------------------------------------------------------------------------|-----------------------------------------------------------------------------------------------------------------------------------------------------------|--------------------------------------------------------|
|                                                                                                                                                                                                                                                        | <u>Control group</u> : delivery of the control intervention to individuals (web-based information on lifestyle factors consisting of optimised standard care material)                           | Provision of access (login) data, e-mail and text message reminders, monitoring of programme usage, evaluation forms, interviews                          | During and post-intervention                           |
| <b>Response of individuals</b>                                                                                                                                                                                                                         | E.g.: Satisfaction with the study procedures (e.g. frequency of MRIs and clinical visits) and the intervention, knowledge, attitude, empowerment, change in behaviour, barriers and facilitators | Questionnaires (primary and secondary endpoints RCT), evaluation forms, interviews                                                                        | Post-intervention, after reaching the primary endpoint |
| <b>Maintenance of individuals</b>                                                                                                                                                                                                                      | <u>PwMS</u> (users of the programme): knowledge, empowerment, change in behaviour and reasons for usage                                                                                          | Questionnaires (primary and secondary endpoints RCT), evaluation forms, interviews                                                                        | During and post-intervention                           |
|                                                                                                                                                                                                                                                        | <u>PwMS</u> (non-user of the programme): knowledge, empowerment, change in behaviour and reasons for non-usage                                                                                   | Contacting participants via e-mail or telephone, questionnaire, interviews                                                                                | During and post-intervention                           |
| <b>Unintended consequences</b>                                                                                                                                                                                                                         | <u>Patients</u> : anxiety, depression, negative impact on disease specific quality of life                                                                                                       | Evaluation form, interviews, secondary outcome measurement                                                                                                | During and post-intervention                           |
|                                                                                                                                                                                                                                                        | <u>Neurologists</u> : professional relationship to patients, barriers for implementation                                                                                                         | Evaluation form, interviews                                                                                                                               | During and post-intervention                           |
|                                                                                                                                                                                                                                                        | <u>Study nurses</u> : stress, professional relationship to patients, barriers for implementation                                                                                                 | Evaluation form, interviews                                                                                                                               | During and post-intervention                           |
| <b>Theory</b>                                                                                                                                                                                                                                          | EBPI, TDF, TPB, Empowerment                                                                                                                                                                      | Application during study planning and the development of study materials, used in evaluation forms, in the programme and in secondary outcome measurement | Pre-, during and post-intervention                     |
| EBPI = evidence-based patient information; MRI = magnetic resonance imaging; MS = Multiple Sclerosis; PwMS = Persons with Multiple Sclerosis; RCT = randomised controlled trial; TDF = Theoretical Domains Framework; TPB = Theory of Planned Behavior |                                                                                                                                                                                                  |                                                                                                                                                           |                                                        |

Table 2: Overview process evaluation POWER@MS 1

Figure 2: Process evaluation POWER@MS1: questions and methods



## Appendix II: Model consent form

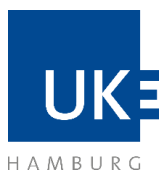

Klinik und Poliklinik für Neurologie  
Institut für Neuroimmunologie und Multiple Sklerose (INIMS)

Universitätsklinikum Hamburg-Eppendorf | Martinistraße 52 | 20246 Hamburg  
Klinik und Poliklinik für Neurologie | Institut für Neuroimmunologie und Multiple Sklerose (INIMS)

Prof. Dr. Christoph Heesen  
Leiter MS-Tagesklinik

Martinistraße 52  
20246 Hamburg

MS-Tagesklinik  
Gebäude W34  
Telefon: +49 (0) 40 7410-54076  
Fax: +49 (0) 40 7410-56973  
multiplesklerose@uke.de  
www.inims.de  
www.uke.de

### Patienteninformation zur Studie „POWER@MS1“ – RCT (Version 1.3)

**Ansprechpartnerinnen: Nicole Krause, Tanja Steffen**  
**Kontakt: [powerms1@uke.de](mailto:powerms1@uke.de)**

Hamburg, 15.06.2020  
Seite 1/8

### Information und Einwilligung zur Studie:

#### Interaktive Webplattform zum EmPOWERment bei früher Multipler Sklerose (POWER@MS1) – Randomisiert kontrollierte Studie (RCT)

Sehr geehrte Studieninteressent\*innen,

das Institut für Neuroimmunologie und Multiple Sklerose sowie der Bundesverband der Selbsthilfe (DMSG) danken Ihnen für Ihr Interesse an unserer Studie zum webbasierten Empowerment für Menschen mit Multipler Sklerose (MS). Die Studie wird öffentlich durch den Innovationsfond beim gemeinsamen Bundesausschuss (G-BA) gefördert.

Bitte lesen Sie diese Studieninformation sorgfältig durch. Ihre Ärztin oder ihr Arzt wird mit Ihnen auch direkt über die Studie sprechen. Bitte fragen Sie diesen oder diese oder kontaktieren Sie den unten genannten Studienleiter Prof. Dr. med. Christoph Heesen oder die Studienkoordinatorinnen Nicole Krause und Tanja Steffen, wenn Sie etwas nicht verstehen oder wenn Sie zusätzlich etwas wissen möchten.

#### Was ist das Ziel dieser Studie?

Bei Ihnen ist kürzlich ein MS Verdacht geäußert oder auch eine MS Diagnose gestellt worden. Diese Diagnose stellt für viele Patienten eine erhebliche Verunsicherung dar. Fragen die viele umtreiben sind zum Beispiel:

Wie sicher ist die Diagnose?

Werde ich einen eher gutartigen oder aktiveren Verlauf haben?

Brauche ich eine ganz frühe Immuntherapie?

Was kann ich tun, außer Medikamente zu nehmen?

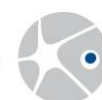



Diese Fragen können im Rahmen von Arztbesuchen, beim Neurologen, nur begrenzt diskutiert werden. Im Internet gibt es eine Fülle von Informationen, deren Qualität oft zweifelhaft ist. Um Sie im ersten Jahr Ihrer MS Diagnose zu begleiten, haben wir verschiedene Materialien entwickelt, die Sie darin unterstützen sollen, einen eigenen Weg mit der Erkrankung zu finden.

Das Ziel dieser Studie ist es zu klären, ob diese von uns entwickelten und über das Internet bereit gestellten Materialien hilfreich sind. Im Verlauf von bis zu 2 Jahren wird insbesondere die Aktivität der MS im MRT (=Magnetresonanztomografie), mit Untersuchungen alle 6 Monate, sehr genau untersucht werden. Darüber hinaus erhalten Sie mehrmals Fragebögen zu möglichen Beeinträchtigungen, zu Ihrer Stimmungslage, aber auch zu Lebensstilfaktoren wie Ihrer sportlichen Aktivität und Ihren Ernährungsgewohnheiten.

### **Auf was müssen Sie sich als Teilnehmer/in einstellen?**

In der Studie werden, in zwei Gruppen, unterschiedliche Informationsstrategien zu Lebensstilfaktoren verglichen. Die Zuordnung zu einer der Gruppen erfolgt zufällig (randomisiert). Wenn Sie sich für die Teilnahme entscheiden, erhalten Sie einen Zugangscode (Login) für eine Internetseite mit Informationen und Schulungsmaterialien. Dort melden Sie sich mit einer E-Mail-Adresse und einem selbst gewählten Passwort an. Die Webseite wird Ihnen über einen neutralen E-Mailabsender (ohne Bezug zur MS), in zeitlichen Abständen, immer wieder Informationen und Erinnerungen schicken. Auch per SMS können Sie auf eigenen Wunsch angesprochen werden. In diese Kontaktaufnahmen müssen Sie einwilligen. Dabei müssen Sie bedenken, dass jegliche Kommunikation über das Internet möglicherweise von Unbefugten abgehört werden kann und ein nicht sicher kalkulierbares Risiko besteht, dass bei der Nutzung von Internetplattformen Dritte an die eingegebenen Informationen gelangen können. Die Wahrscheinlichkeit, dass Ihnen damit jemand schadet ist jedoch sehr gering.

Wenn Sie innerhalb von 3 Monaten vor Studienbeginn ein geeignetes MRT bekommen haben, kann dieses für die Studie genutzt werden. Sollte kein geeignetes MRT vorliegen, erfolgt ein MRT zu Studienbeginn und nach 3, 6 und 12 Monaten. Für einen Teil der Patienten, die sehr früh eingeschlossen werden, erfolgen weitere MRTs zu Monat 18 und 24. Hier sollten die Aufnahmen bestenfalls immer am gleichen Gerät, in der gleichen Praxis erfolgen. Eine Kopie der Bilder wird an die Studienzentrale in Hamburg gesendet werden. Aufgrund der Anzahl an studienbedingten MRT-Untersuchungen entsteht durch die Teilnahme an der POWER@MS1 Studie ein zusätzlicher Zeitaufwand für Sie. Da das Verwenden von Kontrastmittel im Rahmen der Studie nicht notwendig ist, bestehen für Sie aber keine Risiken aufgrund der zusätzlichen MRT-Untersuchungen.

Zu Beginn der Studie und nach 12 Monaten erfolgt eine umfangreichere Erhebung mit Fragebogenmaterialien, aber auch im Verlauf der Studie (maximal 2 Jahre) benötigen wir Ihre Mitarbeit in Form der Bearbeitung von Fragebogenmaterial. Dies stellen wir entweder in Papierform mit Rücksendeumschlag zur Verfügung oder über ein persönliches Login im Internet für die gesicherte Forschungsdatenbank des MS-Registers der Deutschen Multiple Sklerose Gesellschaft (DSMG, Bundesverband e.V.), welche zur elektronischen Abbildung dieser Studie genutzt wird. Die Forschungsdatenbank wird von der MS Forschungs- und Projektentwicklungs-gGmbH in Hannover, einer 100%igen Tochter der DMS-Stiftung der DSMG, auf Servern in Deutschland betrieben. Das Ernährungsverhalten untersuchen wir mit zwei internetbasierten Erhebungsinstrumenten. Eines dieser Instrumente wird über eine gesicherte Online-Platt-

form des Humanstudienzentrums des Deutschen Instituts für Ernährungsforschung (DIfE) verwaltet. Das zweite Instrument wird von der Dietary Assessment Ltd (ein Spin-Out-Unternehmen der Universität Leeds) verwaltet, welche die erhaltenen Daten auf einem Server in den Niederlanden, mit einem Backup in England speichert. Beide Einrichtungen handeln in Übereinstimmung mit der Datenschutz-Grundverordnung (DSGVO) der EU und verarbeiten die Daten in pseudonymisierter Form (das heißt mit einem Code, ohne direkte Verbindung zu Ihrem Namen). Die Links zu den Ernährungserhebungen werden Ihnen über die Studien-E-Mail (powerms1@uke.de) von Mitarbeitern/innen der Studienzentrale in Hamburg zugesendet. Zum Schluss der Studie möchten wir noch mit einigen Teilnehmerinnen und Teilnehmern Interviews durchführen, die aufgezeichnet und verschriftlicht werden. Nach Beendigung der Studie werden die Tonaufnahmen der Interviews vernichtet. Hierzu werden Sie gesondert angesprochen und es erfolgt eine extra Einwilligung dafür.

### Wer kann teilnehmen?

Sie können an der Studie teilnehmen, wenn:

1. Bei Ihnen im letzten Jahr eine MS Verdachtsdiagnose oder definitive Diagnose einer schubförmigen MS gestellt wurde.
2. Sie seit mindestens 6 Monaten keine Immuntherapie erhalten und in den nächsten 3 Monaten keine Immuntherapie geplant ist.
3. In den letzten 4 Wochen keine Cortisontherapie erfolgte und sie nicht schwanger sind.
4. Im Kernspin des Kopfes und Rückens mindestens 2 Entzündungsherde zu sehen sind.
5. Sie einen Internetzugang und ein internetfähiges Gerät (z.B. Laptop oder Tablet) haben.
6. Sie zwischen 18 und 65 Jahre alt sind.

### Gibt es Risiken?

Risiken, jenseits der oben genannten zur Datensicherheit, liegen nicht vor.

### Was passiert, wenn ich einen Schub habe oder neue Herde im MRT erscheinen?

Im Falle eines Schubes müssen Sie Ihren behandelnden Arzt aufsuchen. Dieser wird mit Ihnen zum einen über eine Schubtherapie und zum anderen über eine MS Immuntherapie entscheiden. Genauso liegt, bei Nachweis neuer Herde im MRT, eine Immuntherapieentscheidung an. Dabei kann die Entscheidung auch vertagt werden oder auch eine Entscheidung gegen eine Therapie gefällt werden. Direkt nach diesem Entscheidungsgespräch erfolgt, arzt- und patientenseitig, eine Bewertung. Zusätzlich möchten wir in diesem Fall aus der Studienzentrale eine kurze telefonische Befragung, innerhalb von 4 Wochen, mit Ihnen durchführen.

### Was passiert mit meinen Daten?

Ihre Kontaktdaten werden an die Studienzentrale in Hamburg übermittelt. Ihre E-Mail-Adresse und Mobilfunknummer werden im Programm POWER@MS1 hinterlegt. Das Programm erinnert Sie regelmäßig, wenn neue Materialien für Sie bereit liegen. Dieser Kontakt erfolgt primär per E-Mail oder SMS. Ferner kann es sein, dass Sie kurze Verhaltenstipps per E-Mail oder SMS erhalten. Aus Datenschutzgründen sind E-Mail-Absender über das Programm so allgemein gehalten, dass nicht auf die MS rückgeschlossen werden kann. Hier müssen Sie darauf achten, dass die Nachrichten nicht im Spam-Ordner verschwinden. Zusätzlich kann es sein, dass Sie über die Studien-E-Mail (powerms1@uke.de) von Mitarbeitern/innen der Studien-

zentrale in Hamburg kontaktiert werden, mit der Bitte, bestimmte Studienfragen zu beantworten. Alle Patientendaten werden bis zum Studienende pseudonymisiert in einer Datenbank des deutschen MS-Registers gesammelt. Parallel dazu werden die Kernspindaten in Hamburg pseudonymisiert ausgewertet. Beide Datenbanken werden am Studienende verbunden und zusammen ausgewertet.

Zusätzlich werden die Zugriffszeiten auf der Studienwebsite erfasst, sodass wir abschätzen können, wie intensiv Sie sich mit den Materialien befasst haben. Diese Daten werden, wie alle anderen Daten, pseudonymisiert ausgewertet.

Nach Abschluss der Auswertung werden die Daten (inklusive Audiodaten) in Hamburg am INIMS auf einem geschützten Computer, über einen Zeitraum von 10 Jahren, sicher gelagert und anschließend vernichtet. Mit Ihrer Einwilligung werden darüber hinaus Ihre MS-bezogenen Daten in der Forschungsplattform des MS-Registers gespeichert (siehe Extraeinwilligung MS-Register). Ihre Einwilligung und die Teilnahme Ihres Zentrums am MS-Register vorausgesetzt, werden Ihre Daten gemeinsam mit dem Gesamtdatenbestand des MS-Registers, entsprechend Ihrer Einwilligung, ausgewertet. Die Daten können darüber hinaus der wissenschaftlichen Öffentlichkeit zugänglich gemacht werden, damit unsere Ergebnisse überprüft und gegebenenfalls auch mit anderen Ergebnissen verglichen werden können. Dazu werden die Daten anonymisiert, sodass keine Identifizierung mehr möglich ist. Stimmen Sie im Falle des Widerrufs Ihrer Einwilligungserklärung einer Weiterverwendung Ihrer sicher anonymisierten Daten nicht zu, ist eine Teilnahme an der Studie nicht möglich.

### **Teilnahme, Haftung, Versicherung, Aufwandsentschädigung**

Die Teilnahme an der Studie ist freiwillig. Sie können Ihre Einwilligung jederzeit und ohne Angabe von Gründen widerrufen, ohne dass dadurch Nachteile für Sie entstehen.

Da es sich nicht um eine Studie zur Prüfung eines neuen Arzneimittels oder Medizinproduktes oder eines neuen Anwendungsgebietes handelt, ist keine besondere Studienversicherung (Probandenversicherung) zur Gefährdungshaftung vorgesehen. Es gelten die allgemeinen Haftungsgrundsätze.

Die wissenschaftliche Leitung hat Prof. Dr. med. Christoph Heesen (Telefon: 040-7410-53776). Die Studienkoordinatorin ist Nicole Krause (Telefon: 040-7410-54077). Sollten Sie noch weitere Fragen haben, stehen Ihnen der Versuchsleiter und die Studienkoordinatorin zur Beantwortung gerne zur Verfügung.

Für die Teilnahme an dieser Studie können keinerlei finanzielle Aufwandsentschädigungen gewährt werden.

***Wir würden uns sehr freuen, wenn Sie dieses Projekt durch Ihre Teilnahme unterstützen.***

*Mit freundlichen Grüßen*



Prof. Dr. med. Christoph Heesen



Nicole Krause

## Datenschutzerklärung

Die erhobenen Daten unterliegen der Schweigepflicht und den datenschutzgesetzlichen Bestimmungen. Die Daten werden ausschließlich für wissenschaftliche Zwecke verwendet. Zugriff auf diese Daten haben die Projektleiter/Innen. Die Datenauswertung erfolgt durch Prof. Dr. Heesen und seine explizit autorisierten Mitarbeiter ohne Bezug zu den persönlichen Daten der Studienteilnehmer. Die in den Studien erhobenen Daten werden in pseudonymisierter<sup>1</sup> Form ausgewertet und für die Dauer von 10 Jahren gespeichert. Bei der Pseudonymisierung wird dem richtigen Namen ein Pseudonym (also ein Nummern- und Buchstabencode, z.B. A01, B01) zugeordnet. In den Dokumenten wird nur auf das Pseudonym und nicht auf den Namen verwiesen, sodass personenbezogene Daten nicht oder nur durch einen unverhältnismäßig großen Aufwand einer bestimmten Person zugeordnet werden können. Die personenbezogenen Daten sind gegen unbefugten Zugriff gesichert. Nach Beendigung der Studie werden die Tonaufnahmen der Interviews vernichtet. Ein individueller Widerruf der Erlaubnis zur Verwendung Ihrer Daten ist jederzeit möglich.

Eine Weitergabe der erhobenen Daten im Rahmen der Studie erfolgt nur in anonymisierter<sup>2</sup> Form. Die beteiligten Personen sind zur Verschwiegenheit verpflichtet. Gleiches gilt für die Veröffentlichung der Studienergebnisse.

Die Studienteilnehmer/innen haben das Recht, über die von Ihnen erhobenen personenbezogenen Daten Auskunft zu verlangen und über möglicherweise anfallende personenbezogene Ergebnisse der Studie ggf. informiert zu werden.

Diese Studie ist auch durch die zuständige Ethik-Kommission der Ärztekammer Hamburg beraten worden. Der zuständigen Landesbehörde kann ggf. Einsichtnahme in die Studienunterlagen gewährt werden. Im Falle des Widerrufs Ihrer Einwilligungserklärung werden die bereits erhobenen anonymisierter<sup>2</sup> und in dieser Form weiter genutzt.

---

<sup>1</sup> Pseudonymisieren ist das Ersetzen des Namens und anderer Identifikationsmerkmale durch ein Kennzeichen zu dem Zweck, die Identifizierung des Betroffenen auszuschließen oder wesentlich zu erschweren (§ 3 Abs. 6a Bundesdatenschutzgesetz).

<sup>2</sup> Anonymisieren ist das Verändern personenbezogener Daten derart, dass die Einzelangaben über persönliche oder sachliche Verhältnisse nicht mehr oder nur mit einem unverhältnismäßig großen Aufwand an Zeit, Kosten und Arbeitskraft einer bestimmten oder bestimmbar natürlichen Person zugeordnet werden können (§ 3 Abs. 6 Bundesdatenschutzgesetz).

## Ergänzende Information für Studienteilnehmer gemäß Europäischer Datenschutz-Grundverordnung<sup>3</sup>:

Hiermit informieren wir Sie über die in der DSGVO festgelegten Rechte (Artikel 12 ff. DSGVO):

**Rechtsgrundlage:** Die Rechtsgrundlage zur Verarbeitung der Sie betreffenden personenbezogenen Daten bildet bei klinischen Studien Ihre freiwillige schriftliche Einwilligung gemäß DSGVO sowie der Deklaration von Helsinki (Erklärung des Weltärztebundes zu den ethischen Grundsätzen für die medizinische Forschung am Menschen) und der Leitlinie für Gute Klinische Praxis. Zeitgleich mit der DSGVO tritt in Deutschland das überarbeitete Bundesdatenschutzgesetz (BDSG-neu) in Kraft.

**Für die Datenverarbeitung verantwortliche Person:** Der Studienleiter des Universitätsklinikums Hamburg-Eppendorf: **Prof. Dr. Christoph Heesen**

**Recht auf Auskunft:** Sie haben das Recht auf Auskunft über die Sie betreffenden personenbezogenen Daten, die im Rahmen der klinischen Studie erhoben, verarbeitet oder ggf. an Dritte übermittelt werden (Aushändigen einer kostenfreien Kopie) (Artikel 15 DSGVO, §34 BDSG-neu).

**Recht auf Berichtigung:** Sie haben das Recht, Sie betreffende unrichtige personenbezogene Daten berichtigen zu lassen (Artikel 16 und 19 DSGVO).

**Recht auf Löschung:** Sie haben das Recht auf Löschung Sie betreffender personenbezogener Daten, z. B. wenn diese Daten für den Zweck, für den sie erhoben wurden, nicht mehr notwendig sind (Artikel 17 und 19 DSGVO, §35 BDSG-neu).

**Recht auf Einschränkung der Verarbeitung:** Unter bestimmten Voraussetzungen haben Sie das Recht, eine Einschränkung der Verarbeitung zu verlangen, d.h. die Daten dürfen nur gespeichert, aber nicht verarbeitet werden. Dies müssen Sie beantragen. Wenden Sie sich hierzu bitte an Ihren Studienleiter oder an den Datenschutzbeauftragten des Prüfzentrums (Artikel 18 und 19 DSGVO).

**Recht auf Datenübertragbarkeit:** Sie haben das Recht, die Sie betreffenden personenbezogenen Daten, die Sie dem Verantwortlichen für die klinische Studie bereitgestellt haben, zu erhalten. Damit können Sie beantragen, dass diese Daten entweder Ihnen oder, soweit technisch möglich, einer anderen von Ihnen benannten Stelle übermittelt werden (Artikel 20 DSGVO).

**Widerspruchsrecht:** Sie haben das Recht, jederzeit gegen konkrete Entscheidungen oder Maßnahmen zur Verarbeitung der Sie betreffenden personenbezogenen Daten Widerspruch einzulegen (Art 21 DSGVO, § 36BDSG-neu). Eine solche Verarbeitung findet anschließend grundsätzlich nicht mehr statt.

**Einwilligung zur Verarbeitung personenbezogener Daten und Recht auf Widerruf dieser Einwilligung:** Die Verarbeitung Ihrer personenbezogenen Daten ist nur mit Ihrer Einwilligung rechtmäßig (Artikel 6 DSGVO). Sie haben das Recht, Ihre Einwilligung zur Verarbeitung personenbezogener Daten jederzeit zu widerrufen. Im Falle des Widerrufs müssen Ihre personenbezogenen Daten grundsätzlich gelöscht werden (Artikel 7, Absatz 3 DSGVO). Es gibt allerdings Ausnahmen, nach denen die bis zum Zeitpunkt des Widerrufs erhobenen Daten

---

<sup>3</sup> Verordnung (EU) 2016/679 des Europäischen Parlaments und des Rates vom 27. April 2016 zum Schutz natürlicher Personen bei der Verarbeitung personenbezogener Daten, zum freien Datenverkehr und zur Aufhebung der Richtlinie 95/46/EG (Datenschutz-Grundverordnung)

weiter verarbeitet werden dürfen, z.B. wenn die weitere Datenverarbeitung zur Erfüllung einer rechtlichen Verpflichtung erforderlich ist (Art. 17 Abs. 3 b DSGVO).

**Möchten Sie eines dieser Rechte in Anspruch nehmen, wenden Sie sich bitte an den Studienleiter Ihres Prüfzentrums.**

Außerdem haben Sie das **Recht, Beschwerde bei einer Aufsichtsbehörde/n einzulegen**, wenn Sie der Ansicht sind, dass die Verarbeitung der Sie betreffenden personenbezogenen Daten gegen die DSGVO verstößt. Wenn Sie Bedenken hinsichtlich des Umgangs mit Ihren personenbezogenen Daten haben, können Sie sich an die für Sie zuständige Datenschutzbehörde wenden:

**Die für das UKE beauftragte Behörde**

Datenschutzbeauftragter des  
Universitätsklinikums Hamburg-Eppendorf

Matthias Jaster

Martinstraße 52  
20246 Hamburg  
040 / 7410 - 56890

m.jaster@uke.de

**Datenschutz-Aufsichtsbehörde**

Hamburgische Beauftragte für  
Datenschutz und Informationsfreiheit

Ludwig-Erhard-Str. 22  
20459 Hamburg  
040 / 42854 - 4040

mailbox@datenschutz.hamburg.de

## Einwilligungserklärung zur Teilnahme an der Studie POWER@MS1

Teilnehmer, Teilnehmerin (Name in Druckbuchstaben):

.....

### **Bitte ankreuzen und unterschreiben**

Hiermit willige ich zur freiwilligen Teilnahme an der Studie ein.

Ich wurde mündlich ausführlich und verständlich über das Anliegen, die Bedeutung und die Tragweite der Studie aufgeklärt. Das Informationsschreiben zur Studie und zum Umgang mit den erfassten Daten habe ich gelesen und verstanden. Meine Fragen zur Studie wurden erläutert und beantwortet.

Zur Einwilligung hatte ich ausreichend Zeit. Meine Teilnahme ist freiwillig und kann jederzeit ohne Angaben von Gründen widerrufen werden, ohne dass für mich Nachteile entstehen. Ich habe keinerlei Kosten oder finanziellen Nutzen durch die Teilnahme an dieser Studie. Es gelten die Richtlinien des Datenschutzes.

Eine Kopie der Einwilligungserklärung habe ich erhalten und erkläre hiermit meine freiwillige Teilnahme an dieser Studie.

Ort, Datum

Unterschrift des Teilnehmers / der Teilnehmerin

.....

.....

Ort, Datum

Unterschrift des Arztes

.....

.....

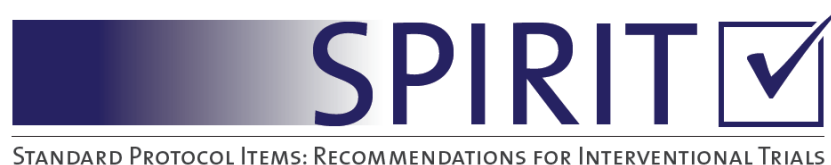

STANDARD PROTOCOL ITEMS: RECOMMENDATIONS FOR INTERVENTIONAL TRIALS

## SPIRIT 2013 Checklist: Recommended items to address in a clinical trial protocol and related documents\*

| Section/item                      | Item No | Description                                                                                                                                                                                                                                                                              | Addressed on page number |
|-----------------------------------|---------|------------------------------------------------------------------------------------------------------------------------------------------------------------------------------------------------------------------------------------------------------------------------------------------|--------------------------|
| <b>Administrative information</b> |         |                                                                                                                                                                                                                                                                                          |                          |
| Title                             | 1       | Descriptive title identifying the study design, population, interventions, and, if applicable, trial acronym                                                                                                                                                                             | <u>1</u>                 |
| Trial registration                | 2a      | Trial identifier and registry name. If not yet registered, name of intended registry                                                                                                                                                                                                     | <u>2</u>                 |
|                                   | 2b      | All items from the World Health Organization Trial Registration Data Set                                                                                                                                                                                                                 | <u>N/A</u>               |
| Protocol version                  | 3       | Date and version identifier                                                                                                                                                                                                                                                              | <u>1</u>                 |
| Funding                           | 4       | Sources and types of financial, material, and other support                                                                                                                                                                                                                              | <u>12</u>                |
| Roles and responsibilities        | 5a      | Names, affiliations, and roles of protocol contributors                                                                                                                                                                                                                                  | <u>1</u>                 |
|                                   | 5b      | Name and contact information for the trial sponsor                                                                                                                                                                                                                                       | <u>12</u>                |
|                                   | 5c      | Role of study sponsor and funders, if any, in study design; collection, management, analysis, and interpretation of data; writing of the report; and the decision to submit the report for publication, including whether they will have ultimate authority over any of these activities | <u>12</u>                |
|                                   | 5d      | Composition, roles, and responsibilities of the coordinating centre, steering committee, endpoint adjudication committee, data management team, and other individuals or groups overseeing the trial, if applicable (see Item 21a for data monitoring committee)                         | <u>11</u>                |



1 **Introduction**

2

3 Background and rationale 6a Description of research question and justification for undertaking the trial, including summary of relevant studies (published and unpublished) examining benefits and harms for each intervention 2-3

4

5

6 6b Explanation for choice of comparators 6

7

8 Objectives 7 Specific objectives or hypotheses 3

9

10 Trial design 8 Description of trial design including type of trial (eg, parallel group, crossover, factorial, single group), allocation ratio, and framework (eg, superiority, equivalence, noninferiority, exploratory) 3-4

11

12

13

14 **Methods: Participants, interventions, and outcomes**

15

16 Study setting 9 Description of study settings (eg, community clinic, academic hospital) and list of countries where data will be collected. Reference to where list of study sites can be obtained 4

17

18

19 Eligibility criteria 10 Inclusion and exclusion criteria for participants. If applicable, eligibility criteria for study centres and individuals who will perform the interventions (eg, surgeons, psychotherapists) 4

20

21

22 Interventions 11a Interventions for each group with sufficient detail to allow replication, including how and when they will be administered 4-6

23

24

25 11b Criteria for discontinuing or modifying allocated interventions for a given trial participant (eg, drug dose change in response to harms, participant request, or improving/worsening disease) 6

26

27

28 11c Strategies to improve adherence to intervention protocols, and any procedures for monitoring adherence (eg, drug tablet return, laboratory tests) 5

29

30

31 11d Relevant concomitant care and interventions that are permitted or prohibited during the trial 6

32

33

34 Outcomes 12 Primary, secondary, and other outcomes, including the specific measurement variable (eg, systolic blood pressure), analysis metric (eg, change from baseline, final value, time to event), method of aggregation (eg, median, proportion), and time point for each outcome. Explanation of the clinical relevance of chosen efficacy and harm outcomes is strongly recommended 6-9

35

36

37

38

39

40 Participant timeline 13 Time schedule of enrolment, interventions (including any run-ins and washouts), assessments, and visits for participants. A schematic diagram is highly recommended (see Figure) 9

41

42

43

44

45

46

1 Sample size 14 Estimated number of participants needed to achieve study objectives and how it was determined, including 9  
 2 clinical and statistical assumptions supporting any sample size calculations

3  
 4 Recruitment 15 Strategies for achieving adequate participant enrolment to reach target sample size 9  
 5

6 **Methods: Assignment of interventions (for controlled trials)**

7  
 8 Allocation:

9  
 10 Sequence 16a Method of generating the allocation sequence (eg, computer-generated random numbers), and list of any 9  
 11 generation factors for stratification. To reduce predictability of a random sequence, details of any planned restriction  
 12 (eg, blocking) should be provided in a separate document that is unavailable to those who enrol participants  
 13 or assign interventions  
 14

15  
 16 Allocation 16b Mechanism of implementing the allocation sequence (eg, central telephone; sequentially numbered, 9  
 17 concealment opaque, sealed envelopes), describing any steps to conceal the sequence until interventions are assigned  
 18 mechanism  
 19

20  
 21 Implementation 16c Who will generate the allocation sequence, who will enrol participants, and who will assign participants to 9  
 22 interventions  
 23

24 Blinding (masking) 17a Who will be blinded after assignment to interventions (eg, trial participants, care providers, outcome 9  
 25 assessors, data analysts), and how  
 26

27 17b If blinded, circumstances under which unblinding is permissible, and procedure for revealing a participant's N/A  
 28 allocated intervention during the trial  
 29  
 30

31 **Methods: Data collection, management, and analysis**

32  
 33 Data collection 18a Plans for assessment and collection of outcome, baseline, and other trial data, including any related 10  
 34 methods processes to promote data quality (eg, duplicate measurements, training of assessors) and a description of  
 35 study instruments (eg, questionnaires, laboratory tests) along with their reliability and validity, if known.  
 36 Reference to where data collection forms can be found, if not in the protocol  
 37

38  
 39 18b Plans to promote participant retention and complete follow-up, including list of any outcome data to be 10  
 40 collected for participants who discontinue or deviate from intervention protocols  
 41  
 42

|    |                                 |     |                                                                                                                                                                                                                                                                                                                                       |                  |
|----|---------------------------------|-----|---------------------------------------------------------------------------------------------------------------------------------------------------------------------------------------------------------------------------------------------------------------------------------------------------------------------------------------|------------------|
| 1  | Data management                 | 19  | Plans for data entry, coding, security, and storage, including any related processes to promote data quality (eg, double data entry; range checks for data values). Reference to where details of data management procedures can be found, if not in the protocol                                                                     | <u>10</u>        |
| 2  |                                 |     |                                                                                                                                                                                                                                                                                                                                       |                  |
| 3  |                                 |     |                                                                                                                                                                                                                                                                                                                                       |                  |
| 4  |                                 |     |                                                                                                                                                                                                                                                                                                                                       |                  |
| 5  | Statistical methods             | 20a | Statistical methods for analysing primary and secondary outcomes. Reference to where other details of the statistical analysis plan can be found, if not in the protocol                                                                                                                                                              | <u>10-11</u>     |
| 6  |                                 |     |                                                                                                                                                                                                                                                                                                                                       |                  |
| 7  |                                 |     |                                                                                                                                                                                                                                                                                                                                       |                  |
| 8  |                                 | 20b | Methods for any additional analyses (eg, subgroup and adjusted analyses)                                                                                                                                                                                                                                                              | <u>10</u>        |
| 9  |                                 |     |                                                                                                                                                                                                                                                                                                                                       |                  |
| 10 |                                 | 20c | Definition of analysis population relating to protocol non-adherence (eg, as randomised analysis), and any statistical methods to handle missing data (eg, multiple imputation)                                                                                                                                                       | <u>10-11</u>     |
| 11 |                                 |     |                                                                                                                                                                                                                                                                                                                                       |                  |
| 12 |                                 |     |                                                                                                                                                                                                                                                                                                                                       |                  |
| 13 |                                 |     |                                                                                                                                                                                                                                                                                                                                       |                  |
| 14 | <b>Methods: Monitoring</b>      |     |                                                                                                                                                                                                                                                                                                                                       |                  |
| 15 |                                 |     |                                                                                                                                                                                                                                                                                                                                       |                  |
| 16 | Data monitoring                 | 21a | Composition of data monitoring committee (DMC); summary of its role and reporting structure; statement of whether it is independent from the sponsor and competing interests; and reference to where further details about its charter can be found, if not in the protocol. Alternatively, an explanation of why a DMC is not needed | <u>11</u>        |
| 17 |                                 |     |                                                                                                                                                                                                                                                                                                                                       |                  |
| 18 |                                 |     |                                                                                                                                                                                                                                                                                                                                       |                  |
| 19 |                                 |     |                                                                                                                                                                                                                                                                                                                                       |                  |
| 20 |                                 |     |                                                                                                                                                                                                                                                                                                                                       |                  |
| 21 |                                 |     |                                                                                                                                                                                                                                                                                                                                       |                  |
| 22 |                                 | 21b | Description of any interim analyses and stopping guidelines, including who will have access to these interim results and make the final decision to terminate the trial                                                                                                                                                               | <u>11</u>        |
| 23 |                                 |     |                                                                                                                                                                                                                                                                                                                                       |                  |
| 24 |                                 |     |                                                                                                                                                                                                                                                                                                                                       |                  |
| 25 | Harms                           | 22  | Plans for collecting, assessing, reporting, and managing solicited and spontaneously reported adverse events and other unintended effects of trial interventions or trial conduct                                                                                                                                                     | <u>11</u>        |
| 26 |                                 |     |                                                                                                                                                                                                                                                                                                                                       |                  |
| 27 |                                 |     |                                                                                                                                                                                                                                                                                                                                       |                  |
| 28 | Auditing                        | 23  | Frequency and procedures for auditing trial conduct, if any, and whether the process will be independent from investigators and the sponsor                                                                                                                                                                                           | <u>11</u>        |
| 29 |                                 |     |                                                                                                                                                                                                                                                                                                                                       |                  |
| 30 |                                 |     |                                                                                                                                                                                                                                                                                                                                       |                  |
| 31 |                                 |     |                                                                                                                                                                                                                                                                                                                                       |                  |
| 32 | <b>Ethics and dissemination</b> |     |                                                                                                                                                                                                                                                                                                                                       |                  |
| 33 |                                 |     |                                                                                                                                                                                                                                                                                                                                       |                  |
| 34 | Research ethics approval        | 24  | Plans for seeking research ethics committee/institutional review board (REC/IRB) approval                                                                                                                                                                                                                                             | <u>2, 11, 12</u> |
| 35 |                                 |     |                                                                                                                                                                                                                                                                                                                                       |                  |
| 36 |                                 |     |                                                                                                                                                                                                                                                                                                                                       |                  |
| 37 | Protocol amendments             | 25  | Plans for communicating important protocol modifications (eg, changes to eligibility criteria, outcomes, analyses) to relevant parties (eg, investigators, REC/IRBs, trial participants, trial registries, journals, regulators)                                                                                                      | <u>12</u>        |
| 38 |                                 |     |                                                                                                                                                                                                                                                                                                                                       |                  |
| 39 |                                 |     |                                                                                                                                                                                                                                                                                                                                       |                  |
| 40 |                                 |     |                                                                                                                                                                                                                                                                                                                                       |                  |
| 41 |                                 |     |                                                                                                                                                                                                                                                                                                                                       |                  |
| 42 |                                 |     |                                                                                                                                                                                                                                                                                                                                       |                  |
| 43 |                                 |     |                                                                                                                                                                                                                                                                                                                                       |                  |
| 44 |                                 |     |                                                                                                                                                                                                                                                                                                                                       |                  |
| 45 |                                 |     |                                                                                                                                                                                                                                                                                                                                       |                  |
| 46 |                                 |     |                                                                                                                                                                                                                                                                                                                                       |                  |

|    |                               |     |                                                                                                                                                                                                                                                                                     |                                |
|----|-------------------------------|-----|-------------------------------------------------------------------------------------------------------------------------------------------------------------------------------------------------------------------------------------------------------------------------------------|--------------------------------|
| 1  | Consent or assent             | 26a | Who will obtain informed consent or assent from potential trial participants or authorised surrogates, and how (see Item 32)                                                                                                                                                        | <u>11</u>                      |
| 2  |                               |     |                                                                                                                                                                                                                                                                                     |                                |
| 3  |                               |     |                                                                                                                                                                                                                                                                                     |                                |
| 4  |                               | 26b | Additional consent provisions for collection and use of participant data and biological specimens in ancillary studies, if applicable                                                                                                                                               | <u>N/A</u>                     |
| 5  |                               |     |                                                                                                                                                                                                                                                                                     |                                |
| 6  |                               |     |                                                                                                                                                                                                                                                                                     |                                |
| 7  | Confidentiality               | 27  | How personal information about potential and enrolled participants will be collected, shared, and maintained in order to protect confidentiality before, during, and after the trial                                                                                                | <u>10, 11</u>                  |
| 8  |                               |     |                                                                                                                                                                                                                                                                                     |                                |
| 9  |                               |     |                                                                                                                                                                                                                                                                                     |                                |
| 10 | Declaration of interests      | 28  | Financial and other competing interests for principal investigators for the overall trial and each study site                                                                                                                                                                       | <u>12</u>                      |
| 11 |                               |     |                                                                                                                                                                                                                                                                                     |                                |
| 12 |                               |     |                                                                                                                                                                                                                                                                                     |                                |
| 13 | Access to data                | 29  | Statement of who will have access to the final trial dataset, and disclosure of contractual agreements that limit such access for investigators                                                                                                                                     | <u>11</u>                      |
| 14 |                               |     |                                                                                                                                                                                                                                                                                     |                                |
| 15 |                               |     |                                                                                                                                                                                                                                                                                     |                                |
| 16 | Ancillary and post-trial care | 30  | Provisions, if any, for ancillary and post-trial care, and for compensation to those who suffer harm from trial participation                                                                                                                                                       | <u>N/A</u>                     |
| 17 |                               |     |                                                                                                                                                                                                                                                                                     |                                |
| 18 |                               |     |                                                                                                                                                                                                                                                                                     |                                |
| 19 |                               |     |                                                                                                                                                                                                                                                                                     |                                |
| 20 | Dissemination policy          | 31a | Plans for investigators and sponsor to communicate trial results to participants, healthcare professionals, the public, and other relevant groups (eg, via publication, reporting in results databases, or other data sharing arrangements), including any publication restrictions | <u>2, 11</u>                   |
| 21 |                               |     |                                                                                                                                                                                                                                                                                     |                                |
| 22 |                               |     |                                                                                                                                                                                                                                                                                     |                                |
| 23 |                               |     |                                                                                                                                                                                                                                                                                     |                                |
| 24 |                               | 31b | Authorship eligibility guidelines and any intended use of professional writers                                                                                                                                                                                                      | <u>11</u>                      |
| 25 |                               |     |                                                                                                                                                                                                                                                                                     |                                |
| 26 |                               | 31c | Plans, if any, for granting public access to the full protocol, participant-level dataset, and statistical code                                                                                                                                                                     | <u>11</u>                      |
| 27 |                               |     |                                                                                                                                                                                                                                                                                     |                                |
| 28 |                               |     |                                                                                                                                                                                                                                                                                     |                                |
| 29 | <b>Appendices</b>             |     |                                                                                                                                                                                                                                                                                     |                                |
| 30 |                               |     |                                                                                                                                                                                                                                                                                     |                                |
| 31 | Informed consent materials    | 32  | Model consent form and other related documentation given to participants and authorised surrogates                                                                                                                                                                                  | <u>Appendix II<sup>o</sup></u> |
| 32 |                               |     |                                                                                                                                                                                                                                                                                     |                                |
| 33 |                               |     |                                                                                                                                                                                                                                                                                     |                                |
| 34 | Biological specimens          | 33  | Plans for collection, laboratory evaluation, and storage of biological specimens for genetic or molecular analysis in the current trial and for future use in ancillary studies, if applicable                                                                                      | <u>N/A</u>                     |
| 35 |                               |     |                                                                                                                                                                                                                                                                                     |                                |
| 36 |                               |     |                                                                                                                                                                                                                                                                                     |                                |

37 \*It is strongly recommended that this checklist be read in conjunction with the SPIRIT 2013 Explanation & Elaboration for important clarification on the items.  
 38 Amendments to the protocol should be tracked and dated. The SPIRIT checklist is copyrighted by the SPIRIT Group under the Creative Commons  
 39 "[Attribution-NonCommercial-NoDerivs 3.0 Unported](https://creativecommons.org/licenses/by-nc-nd/3.0/)" license.  
 40

41 <sup>o</sup>Available in German.  
 42

# BMJ Open

## Study protocol for a randomised controlled trial of a web-based behavioural lifestyle programme for emPOWERment in early Multiple Sclerosis (POWER@MS1)

|                                 |                                                                                                                                                                                                                                                                                                                                                                                                                                                                                                                                                                                                                                                                                                                                                                                                                                                                                                                                                                                                                                                                                                                                                                                                                                                                                                                                                                                                                                                                                                                                                                                                                                                                                                                                                                                                                                                                                                                                                                                                                                                  |
|---------------------------------|--------------------------------------------------------------------------------------------------------------------------------------------------------------------------------------------------------------------------------------------------------------------------------------------------------------------------------------------------------------------------------------------------------------------------------------------------------------------------------------------------------------------------------------------------------------------------------------------------------------------------------------------------------------------------------------------------------------------------------------------------------------------------------------------------------------------------------------------------------------------------------------------------------------------------------------------------------------------------------------------------------------------------------------------------------------------------------------------------------------------------------------------------------------------------------------------------------------------------------------------------------------------------------------------------------------------------------------------------------------------------------------------------------------------------------------------------------------------------------------------------------------------------------------------------------------------------------------------------------------------------------------------------------------------------------------------------------------------------------------------------------------------------------------------------------------------------------------------------------------------------------------------------------------------------------------------------------------------------------------------------------------------------------------------------|
| Journal:                        | <i>BMJ Open</i>                                                                                                                                                                                                                                                                                                                                                                                                                                                                                                                                                                                                                                                                                                                                                                                                                                                                                                                                                                                                                                                                                                                                                                                                                                                                                                                                                                                                                                                                                                                                                                                                                                                                                                                                                                                                                                                                                                                                                                                                                                  |
| Manuscript ID                   | bmjopen-2020-041720.R2                                                                                                                                                                                                                                                                                                                                                                                                                                                                                                                                                                                                                                                                                                                                                                                                                                                                                                                                                                                                                                                                                                                                                                                                                                                                                                                                                                                                                                                                                                                                                                                                                                                                                                                                                                                                                                                                                                                                                                                                                           |
| Article Type:                   | Protocol                                                                                                                                                                                                                                                                                                                                                                                                                                                                                                                                                                                                                                                                                                                                                                                                                                                                                                                                                                                                                                                                                                                                                                                                                                                                                                                                                                                                                                                                                                                                                                                                                                                                                                                                                                                                                                                                                                                                                                                                                                         |
| Date Submitted by the Author:   | 17-Dec-2020                                                                                                                                                                                                                                                                                                                                                                                                                                                                                                                                                                                                                                                                                                                                                                                                                                                                                                                                                                                                                                                                                                                                                                                                                                                                                                                                                                                                                                                                                                                                                                                                                                                                                                                                                                                                                                                                                                                                                                                                                                      |
| Complete List of Authors:       | <p>Krause, Nicole; University Medical Center Hamburg-Eppendorf, Institute of Neuroimmunology and Multiple Sclerosis (INIMS)<br/> Riemann-Lorenz, Karin; Institute of Neuroimmunology and Multiple Sclerosis (INIMS), University Medical Center Hamburg-Eppendorf<br/> Steffen, Tanja; Institute of Neuroimmunology and Multiple Sclerosis (INIMS), University Medical Center Hamburg-Eppendorf<br/> Rahn, Anne; Institute of Neuroimmunology and Multiple Sclerosis (INIMS), University Medical Center Hamburg-Eppendorf; Department of Health Services Research, Carl von Ossietzky University Oldenburg<br/> Pöttgen, Jana; Institute of Neuroimmunology and Multiple Sclerosis (INIMS), University Medical Center Hamburg-Eppendorf; Department of Neurology, University Medical Center Hamburg-Eppendorf<br/> Stellmann, Jan-Patrick; Institute of Neuroimmunology and Multiple Sclerosis (INIMS), University Medical Center Hamburg-Eppendorf; APHM, Hopital de la Timone, CEMEREM<br/> Koepke, Sascha; Institute of Nursing Science, University of Cologne<br/> Friede, Tim; Institute for Medical Statistics, University Medical Centre Göttingen<br/> Icks, Andrea; Institute for Health Services Research and Health Economics, Heinrich Heine University Düsseldorf<br/> Vomhof, Markus; Institute for Health Services Research and Health Economics, Heinrich Heine University Düsseldorf<br/> Temmes, Herbert; Deutsche Multiple Sklerose Gesellschaft, Bundesverband e.V.<br/> van de Loo, Markus; Deutsche Multiple Sklerose Gesellschaft, Bundesverband e.V.<br/> Gold, Stefan M.; Institute of Neuroimmunology and Multiple Sclerosis (INIMS), University Medical Center Hamburg-Eppendorf; Charité Universitätsmedizin Berlin, Department of Psychiatry and Medical Department, Section Psychosomatic Medicine (CBF)<br/> Heesen, Christoph; Institute of Neuroimmunology and Multiple Sclerosis (INIMS), University Medical Center Hamburg-Eppendorf; Department of Neurology, University Medical Center Hamburg-Eppendorf</p> |
| <b>Primary Subject Heading</b>: | Neurology                                                                                                                                                                                                                                                                                                                                                                                                                                                                                                                                                                                                                                                                                                                                                                                                                                                                                                                                                                                                                                                                                                                                                                                                                                                                                                                                                                                                                                                                                                                                                                                                                                                                                                                                                                                                                                                                                                                                                                                                                                        |
| Secondary Subject Heading:      | Evidence based practice, Patient-centred medicine, Public health, Communication                                                                                                                                                                                                                                                                                                                                                                                                                                                                                                                                                                                                                                                                                                                                                                                                                                                                                                                                                                                                                                                                                                                                                                                                                                                                                                                                                                                                                                                                                                                                                                                                                                                                                                                                                                                                                                                                                                                                                                  |

1  
2  
3  
4  
5  
6  
7  
8  
9  
10  
11  
12  
13  
14  
15  
16  
17  
18  
19  
20  
21  
22  
23  
24  
25  
26  
27  
28  
29  
30  
31  
32  
33  
34  
35  
36  
37  
38  
39  
40  
41  
42  
43  
44  
45  
46  
47  
48  
49  
50  
51  
52  
53  
54  
55  
56  
57  
58  
59  
60

|           |                                                                                                                                                                                          |
|-----------|------------------------------------------------------------------------------------------------------------------------------------------------------------------------------------------|
| Keywords: | Multiple sclerosis < NEUROLOGY, PUBLIC HEALTH, Clinical trials < THERAPEUTICS, Information technology < BIOTECHNOLOGY & BIOINFORMATICS, Magnetic resonance imaging < RADIOLOGY & IMAGING |
|           |                                                                                                                                                                                          |





I, the Submitting Author has the right to grant and does grant on behalf of all authors of the Work (as defined in the below author licence), an exclusive licence and/or a non-exclusive licence for contributions from authors who are: i) UK Crown employees; ii) where BMJ has agreed a CC-BY licence shall apply, and/or iii) in accordance with the terms applicable for US Federal Government officers or employees acting as part of their official duties; on a worldwide, perpetual, irrevocable, royalty-free basis to BMJ Publishing Group Ltd ("BMJ") its licensees and where the relevant Journal is co-owned by BMJ to the co-owners of the Journal, to publish the Work in this journal and any other BMJ products and to exploit all rights, as set out in our [licence](#).

The Submitting Author accepts and understands that any supply made under these terms is made by BMJ to the Submitting Author unless you are acting as an employee on behalf of your employer or a postgraduate student of an affiliated institution which is paying any applicable article publishing charge ("APC") for Open Access articles. Where the Submitting Author wishes to make the Work available on an Open Access basis (and intends to pay the relevant APC), the terms of reuse of such Open Access shall be governed by a Creative Commons licence – details of these licences and which [Creative Commons](#) licence will apply to this Work are set out in our licence referred to above.

Other than as permitted in any relevant BMJ Author's Self Archiving Policies, I confirm this Work has not been accepted for publication elsewhere, is not being considered for publication elsewhere and does not duplicate material already published. I confirm all authors consent to publication of this Work and authorise the granting of this licence.

# Study protocol for a randomised controlled trial of a web-based behavioural lifestyle programme for emPOWERment in early Multiple Sclerosis (POWER@MS1)

Nicole Krause<sup>1</sup>, Karin Riemann-Lorenz<sup>1</sup>, Tanja Steffen<sup>1</sup>, Anne Christin Rahn<sup>1,2</sup>, Jana Pöttgen<sup>1,3</sup>, Jan-Patrick Stellmann<sup>1,4</sup>, Sascha Köpke<sup>5</sup>, Tim Friede<sup>6</sup>, Andrea Icks<sup>7</sup>, Markus Vomhof<sup>7</sup>, Herbert Temmes<sup>8</sup>, Markus van de Loo<sup>8</sup>, Stefan M. Gold<sup>1,9</sup> and Christoph Heesen<sup>1,3</sup>

---

## Correspondence to

Nicole Krause; Institute of Neuroimmunology and Multiple Sclerosis (INIMS), University Medical Center Hamburg-Eppendorf, Martinistraße 52, 20246 Hamburg, Germany; n.krause@uke.de

## Author affiliations

<sup>1</sup> Institute of Neuroimmunology and Multiple Sclerosis (INIMS), University Medical Center Hamburg-Eppendorf, Hamburg, Germany

<sup>2</sup> Department of Health Services Research, Carl von Ossietzky University Oldenburg, Oldenburg, Germany

<sup>3</sup> Department of Neurology, University Medical Center Hamburg-Eppendorf, Hamburg, Germany

<sup>4</sup> APHM, Hopital de la Timone, CEMEREM, Marseille, France

<sup>5</sup> Institute of Nursing Science, University of Cologne, Cologne, Germany

<sup>6</sup> Institute for Medical Statistics, University Medical Centre Göttingen, Göttingen, Germany

<sup>7</sup> Institute for Health Services Research and Health Economics, Heinrich Heine University Düsseldorf, Düsseldorf, Germany

<sup>8</sup> Deutsche Multiple Sklerose Gesellschaft, Bundesverband e.V., Hannover, Germany

<sup>9</sup> Charité Universitätsmedizin Berlin, Department of Psychiatry and Medical Department, Section Psychosomatic Medicine (CBF), Berlin, Germany

**Word count:** 4,139

**Issue date:** 14<sup>th</sup> December 2020

**Protocol amendment number:** 03



## ABSTRACT

**Introduction** Multiple sclerosis (MS) is an inflammatory and degenerative disease of the central nervous system that mainly affects young adults. Uncertainty is a major psychological burden of the disease from diagnosis to prognosis, enhanced by the pressure to make early decisions on a diverse set of immunotherapies. Watchful waiting for 1-2 years while adapting goals and lifestyle habits to life with a chronic disease represents another reasonable option for persons with MS (PwMS). A behaviour change programme based on evidence-based patient information (EBPI) is not available in standard care. This randomised controlled trial (RCT) with an embedded process evaluation investigates the efficacy and cost-effectiveness of a web-based behavioural lifestyle programme to change lifestyle behaviour and reduce inflammatory disease activity in PwMS.

**Methods and analysis** A web-based behavioural intervention will be evaluated in a RCT aiming to recruit 328 persons with clinically isolated syndrome (CIS), suspected MS or confirmed MS for less than one year, who have not yet started immunotherapy. Moreover, a mixed-methods process evaluation and a health economic evaluation will be carried out. Participants will be recruited in at least 16 MS centres across Germany and randomised to an intervention group with 12 months of access to EBPI about lifestyle factors in MS, combined with a complex behaviour change programme or to a control group (optimised standard care). The combined primary endpoint is the incidence of new T2 lesions on magnetic resonance imaging or confirmed relapses.

**Ethics and dissemination** The study has been approved by the Ethics Committee of the Hamburg Chamber of Physicians (PV6015) and prospectively registered at ClinicalTrials.gov (NCT03968172). Trial results will be communicated at scientific conferences and meetings and presented on relevant patient websites and in patient education seminars.

**Keywords** Multiple sclerosis, Complex intervention, Lifestyle intervention, Randomised controlled trial, Evidence-based medicine

### Strengths and limitations of this study

- Patients are actively involved in the development process of the intervention group programme in order to address the complex needs of newly diagnosed PwMS.
- This study provides an opportunity to test if lifestyle interventions can influence surrogate measures of disease activity in an immune-mediated disease.
- The intervention does not include personal consultation, which may limit the extent and sustainability of changes in lifestyle habits.
- We aimed to design a patient-centred pragmatic trial and thus selected patient reported outcomes as secondary endpoints, however, objective measures, as e.g. accelerometry, are not included.

---

## INTRODUCTION

Multiple Sclerosis (MS) is an inflammatory and degenerative disease of the central nervous system (CNS) that affects about 240,000 people in Germany, typically first diagnosed during early adulthood (1). Over the past decade, new diagnostic criteria (2) enabled earlier diagnosis of the disease and magnetic resonance imaging (MRI) has become a crucial diagnostic and

1  
2  
3 prognostic instrument. Moreover, MRI is used for the evaluation of treatment success despite  
4 considerable limitations (3). However, there is still no highly specific diagnostic marker and  
5 diagnosis may remain unclear for years. In addition, reliable prognosis remains difficult and it  
6 is hardly possible to estimate the long-term expected disability, especially when based on  
7 disease development during the first 1-2 years after onset. For this reason, diagnostic  
8 information about MS is often experienced as traumatising and can cause disappointment and  
9 distrust in the medical system at an early stage (4). Although available immunotherapies reduce  
10 relapse rates, the long-term benefit on disability progression remains unclear (5, 6).  
11 Nevertheless, early therapy directly after MS diagnosis is recommended (7), while adherence  
12 to immunotherapy in the first two years may be as low as 30-50% (8). These manifold  
13 uncertainties and the resulting psychological stress may have a negative effect on MS disease  
14 activity (9).  
15  
16  
17  
18

19 Surveys have shown that PwMS are a patient group that frequently uses internet sources to  
20 gather information (10). However, these sources often provide contradictory and poorly curated  
21 advice on lifestyle-related matters (11). The existing care structures cannot meet the complex  
22 information needs of PwMS. Experimental research as well as several clinical studies have  
23 suggested that improved lifestyle management may have the potential to impact inflammatory  
24 and neurodegenerative processes in MS (12, 13). Rigorous studies are largely missing and  
25 systematic, evidence-based patient information (EBPI) about lifestyle factors in MS combined  
26 with a behaviour change programme is not available. Training and empowerment interventions  
27 in MS have so far mainly been studied in face-to-face or group programmes (14). There are  
28 only very few examples for interventions that effectively change physical activity behaviour in  
29 MS. Motl et al. (15) have demonstrated in a pilot study that an internet-based intervention may  
30 change walking behaviour as assessed by self-report. However, online interventions in MS have  
31 mainly been investigated for the management of symptoms such as depression and fatigue (16,  
32 17), but not for change of overall lifestyle behaviour. POWER@MS1 aims to encourage PwMS  
33 to find the best way of dealing with the disease on the basis of EBPI and a complex behaviour  
34 change intervention. The goal of the web-based behavioural lifestyle programme evaluated in  
35 this RCT is to optimise coping strategies and lifestyle habits, such as stress management,  
36 sleeping behaviour, physical activity and dietary behaviour. This may lead to decreased disease  
37 activity and lower distress to make an early treatment decision. Together with the careful MRI  
38 monitoring of the disease dynamics in the study, this procedure might enable a more targeted  
39 immunotherapy initiation.  
40  
41  
42  
43  
44

## 45 **Objectives**

46  
47 This study investigates the hypothesis that EBPI about lifestyle factors in MS combined with a  
48 complex behaviour change programme (EBBC programme) can reduce inflammatory disease  
49 activity in MS and change patient behaviour.  
50

### 51 *Primary objective*

52  
53 To determine if the EBBC programme can reduce inflammatory disease activity in MS as  
54 measured clinically by relapses or by new T2 lesions on MRI.  
55

### 56 *Secondary objectives*

57  
58 The secondary objectives are to determine if the EBBC programme can  
59

- 60 • strengthen patient autonomy and empowerment

- promote informed decisions on immunotherapy,
- improve quality of life,
- reduce anxiety and depression,
- increase physical activity and a healthy dietary behaviour,
- increase effectiveness of neurologist consultations,
- fit with users and contextual factors,
- and save health care costs.

## METHODS AND ANALYSIS

### Study design

Based on developmental work following the Medical Research Council (MRC) Framework for the development and evaluation of complex interventions (18), a web-based behavioural intervention programme on lifestyle adaptation in MS was developed (for details see below). In addition, a web-based control group programme was developed based on information material available from the German Multiple Sclerosis Society (DMSG). Details with regard to the development and adaptation process will be reported in a separate publication.

The intervention will be evaluated in a superiority, rater-blinded, randomised controlled, parallel group trial. This protocol is focusing purely on the RCT. Study participants will be randomised to the intervention group (IG) with access to the EBBC programme in addition to standard of care or to the control group (CG) with optimised standard care using an allocation ratio of 1:1. In addition, a mixed-methods process evaluation (see Appendix I) and a health economic evaluation will be carried out.

### Study setting

Recruitment and neurological encounters will take place in community clinics, private practises, and academic hospitals with a specialisation in MS across Germany.

### Eligibility criteria

Persons aged between 18 and 65 years with CIS, suspected or confirmed MS for less than 12 months, who signed informed consent, will be included. Furthermore, they must have at least two MS-typical lesions on T2-weighted images on MRI scans and an MS typical cerebrospinal fluid finding with detection of oligoclonal bands. Internet access is mandatory for participation. PwMS who are not able to provide informed consent or have a substantial psychiatric disorder or substantial cognitive deficit based on clinical impression will be excluded. PwMS who have been treated with glatiramer acetate, teriflunomide, dimethylfumarate or interferons within the last six months prior to study inclusion or have received corticosteroid therapy within 4 weeks prior to study inclusion will also be excluded. PwMS with a planned treatment start within three months after inclusion or PwMS who had received any other MS-specific immunotherapy at any time in the past will not be eligible. Pregnancy and claustrophobia are also exclusion criteria.

### Interventions

Eligible PwMS will be randomised to the IG programme or the CG programme. Both programmes will be offered online on the same platform with a similar design.

*Intervention group (IG): EBBC programme*

1  
2  
3 The IG programme is an MS-specific adaptation of the earlier developed “Optimune®” tool by  
4 GAIA (<https://gaia-group.com/en/>). Based on current research and theory of the field (19-21),  
5 it was developed for lifestyle management in cancer patients based on empowerment (22) and  
6 cognitive behavioural therapy (CBT) approaches, including acceptance and mindfulness  
7 oriented techniques (23-25). These techniques influence different theoretical domains as  
8 outlined in the theoretical domains framework (21) and thereby the participants' ability,  
9 motivation and opportunity to change their physical activity, stress management attitudes and  
10 dietary behaviour. For example, CBT techniques such as behavioural activation and identifying  
11 and refuting unhelpful automatic thoughts and cognitive distortions, goal setting, goal review,  
12 agreeing on behavioural contracts, setting graded tasks, planning social support, action  
13 planning, weighing of pros and cons, preparing for/dealing with setbacks, self-motivational  
14 statements, constructing if-then plans and formulating implementation intentions and positive  
15 emotion induction are incorporated throughout. Mental imagery exercises and  
16 mindfulness/acceptance exercises are integrated both in text format and as audio recording.  
17 Furthermore, EBPI, autonomy supportive intervention concepts based on self-determination  
18 theory (26), the principles of responsiveness (27) and individual content-tailoring (28, 29) are  
19 crucial components of the intervention format. The programme specifically attempts to avoid  
20 fear appeals and simple information provision (e.g. ‘lecturing’). The programme does not  
21 provide drug specific information about available immunotherapies. The programme aims to  
22 translate evidence in the MS treatment and lifestyle management area in order to illustrate that  
23 decisions can be made. It follows the concept that every PwMS can develop an individual  
24 approach towards the disease, which might be a targeted immunotherapy initiation in one case  
25 or the development of a sophisticated food concept in the other.

26  
27  
28  
29  
30  
31  
32 The system is based on the AI-based software platform broca<sup>®</sup>, which is the basis for several  
33 effective therapy support systems evaluated in earlier RCTs, e.g. (16, 23, 30-32). An optional  
34 email and SMS reminder system (e.g. with lifestyle-related stimuli or reminders regarding  
35 programme usage and newly activated modules) aims to enhance involvement. Usage of the IG  
36 programme will be monitored biweekly and reacted on after four weeks of non-usage to ensure  
37 patient adherence.

38  
39  
40 The programme is designed as a highly individualised system that provides PwMS with  
41 narrative and coordinated information based on their existing health beliefs, interests, etc. Each  
42 text passage ends with a set of pre-programmed response options in multiple-choice format  
43 reflecting possible reader’s feedback, such as “Yes. That makes sense.” or “I do not quite  
44 understand this yet.” The participant is invited to tick the matching response and will be guided  
45 to the next page referring to the choice, e.g. “I’m glad that you can understand it.” or “No  
46 problem. Then let me explain it in a little more detail.” These simulated dialogues lead to a  
47 highly individualised way through the intervention, while on the other hand, the programme  
48 makes sure that every important area is touched. More precisely, disease management and  
49 lifestyle techniques as well as exercises will be taught in sequentially active interactive learning  
50 units (“simulated dialogues”) focusing on the following topics:

- 51 1. Diagnosis, prognosis and immunotherapy decision making
- 52 2. Support in coping
- 53 3. Techniques for coping with stress / depressive symptoms and developing positive emotions
- 54 4. Optimisation of dietary behaviour
- 55 5. Optimisation of physical activity behaviour
- 56 6. Sleep hygiene and methods for dealing with insomnia

The modules are not ordered by priority. Altogether, the IG programme will consist of 16 modules and accompany each participant over a period of 12 months with initial 2-3 weekly modules, later only weekly reminders and modules every 2 weeks and 4 booster sessions at the end.

#### *Control group (CG): Information from self-help societies*

CG participants will receive access to an information platform with optimised standard care consisting of information compiled from DMSG information material to reflect current practice. It will also accompany participants over a period of 12 months and cover similar topics as in the IG. A reminder function as well as usage monitoring and adherence promotion will be applied as in the IG.

#### **Patient and public involvement**

PwMS were involved in the development phase of the intervention and also participated in the feasibility and piloting testing of the IG programme (see “Study design”). They were given access to the programme and invited to evaluate content, practicability, user-friendliness and comprehensibility of the programme, also considering the needs of newly diagnosed PwMS. The programme was revised based on the acquired feedback (e.g. technical adjustments, inclusion of more break possibilities and a progress bar in the modules). In addition, suggestions for prospective adjustments, which were not possible due to technical limitations, such as the embedding of video material, were gathered. Details regarding the feedback and resulting programme changes will be communicated in a separate publication.

#### **Criteria for discontinuation and relevant concomitant care**

In case of new events (relapse or T2 lesion), formally the primary endpoint will be reached. However, study participants will be asked to stay in the study. Immunotherapy may be started during the trial period. Immunotherapy type, use, and adherence rates will be collected during the clinical visits throughout the study.

#### **Outcomes**

Data will be collected over a period of 12 months, with a flexible follow-up of up to 24 months in early recruited PwMS. A list of outcomes including measurement time points is provided in Table 1.

| Instrument         | Measurement time points |       |       |       |       |       |         |         |       |
|--------------------|-------------------------|-------|-------|-------|-------|-------|---------|---------|-------|
|                    | $t_{-1}$                | $t_0$ | $V_1$ | $V_2$ | $V_3$ | $V_4$ | $V_5^*$ | $V_6^*$ | $t_x$ |
| Month              | -1                      | 0     | 1     | 3     | 6     | 12    | 18*     | 24*     | X     |
| Eligibility screen | X                       |       |       |       |       |       |         |         |       |
| Informed consent   | X                       |       |       |       |       |       |         |         |       |
| Demographic data   | X                       |       |       |       |       |       |         |         |       |
| MRI                |                         | X     |       | X     | X     | X     | X       | X       |       |
| Clinical visit     |                         | X     | X     | X     | X     | X     | X       | X       |       |
| Relapse history    |                         | X     | X     | X     | X     | X     | X       | X       | X     |

|                            |   |   |   |   |   |   |   |   |
|----------------------------|---|---|---|---|---|---|---|---|
| Immunotherapy status       | X | X | X | X | X | X | X | X |
| EDSS                       | X |   |   |   | X |   |   |   |
| RIKNO10                    |   |   | X |   |   |   |   |   |
| CPS                        |   |   |   |   | X |   |   | X |
| Decision satisfaction      |   |   |   |   |   |   |   | X |
| Patient activation         | X |   |   |   | X |   |   |   |
| Emotional coping           | X |   |   |   | X |   |   |   |
| Changes in empowerment     |   |   |   |   | X |   |   |   |
| Expectancy                 |   | X |   |   |   |   |   |   |
| Readiness to change        | X |   | X |   | X |   |   |   |
| HAQUAMS                    | X |   |   |   | X |   |   |   |
| EQ-5D-5L                   | X |   |   | X | X | X | X |   |
| HADS                       | X |   |   |   | X |   |   |   |
| GLTEQ                      | X |   |   |   | X |   |   |   |
| BSA                        | X |   |   |   | X |   |   |   |
| QHOD2                      | X |   | X |   | X |   |   |   |
| myfood24                   | X |   |   |   | X |   |   |   |
| Process evaluation         | X | X | X | X | X | X | X | X |
| Health economic parameters | X |   |   |   | X | X | X | X |

$t_1$  = before enrolment;  $t_0$  = before allocation;  $V_1 - V_6$  = post allocation ( $V_1$  = Visit in month 1;  $V_2$  = Visit in month 3;  $V_3$  = Visit in month 6;  $V_4$  = Visit in month 12;  $V_5$  = Visit in month 18;  $V_6$  = Visit in month 24); \* = only in early recruited PwMS;  $t_x$  = after reaching the primary endpoint.

BSA: Bewegungs- und Sportaktivität Fragebogen (Physical Activity, Exercise, and Sport Questionnaire); CPS: Control Preference Scale; EDSS: Expanded Disability Status Scale; GLTEQ: Godin Leisure-Time Exercise Questionnaire; HADS: Hospital Anxiety and Depression Scale; HAPA: Health Action Process Approach; HAQUAMS: Hamburg Quality of Life in MS Scale; MRI: Magnetic Resonance Imaging; QHOD2: Questionnaire of Healthy Diet; RIKNO: Risk Knowledge in Relapsing Multiple Sclerosis.

Table 1: Assessments and measurement time points

### Primary outcome

The primary endpoint is the time to a new relapse or, as a surrogate for inflammatory disease activity, a new lesion on T2-weighted images on MRI scans, whatever first occurs. Occurrence of new T2 lesions will be assessed according to an MRI protocol (Localizer, 3D FLAIR sagittal e.g. 3x3mm, 3D image T1w native sagittal, 1-3mm, PD/T2w axial 3mm, protocol duration approx. 20 min.). MRI scans will be read centrally by an experienced rater, blinded to subject identity and group assignment.

Relapses will be clinically evaluated by participating neurologists. In case of a relapse, duration of complaints/impairment, relapse symptoms (worsened or newly occurred), degree of impairment due to the relapse and the degree of certainty with regard to the classification of the worsening as a relapse will be assessed.

### *Secondary outcomes*

To assess risk knowledge, an abbreviated 10-item version of the MS risk knowledge questionnaire (RIKNO 2.0 (33)) will be used.

As a surrogate of decision quality, preferred and realized role preference in decision discussions for or against immunotherapy based on the Control Preference Scale (CPS) (34) will be assessed. Immunotherapy status will be assessed to determine whether an immunotherapy was newly started, aborted or changed.

The extent of patient activation (i.e. expressed in the confidence and knowledge to take action, as well as actually taking health-related action) based on the Patient Activation Measure, PAM (35) and the coping capability, based on two items (item 10 and 24) of the coping self-efficacy scale, CSES (36) will be measured. In addition, patient expectancies based on items 1-3 of the credibility/expectancy questionnaire (37) will be assessed. Based on principles of the Health Action Process Approach, HAPA (38), readiness to change (39) will be estimated in order to determine the interventions impact on willingness to change lifestyle habits. Moreover, changes in perceived empowerment (based on (40), items 1, 3 and 4) will be measured.

Impairment in the Expanded Disability Status Scale (EDSS) (41) will be determined by the treating neurologist.

Ideally, the lifestyle intervention leads to more general satisfaction with life but may also alleviate symptoms such as depression, anxiety, fatigue. Quality of life will be measured with the Hamburg Quality of Life in MS Scale, HAQUAMS (42) and the generic EQ-5D-5L (43). The Hospital anxiety and distress scale, HADS (44) will be used as a measures for depression and anxiety.

Physical activity behaviour will be measured with the Godin Leisure-Time Exercise Questionnaire (GLTEQ) (45) and the Physical Activity, Exercise, and Sport Questionnaire (Bewegungs- und Sportaktivität (BSA)) (46).

The Questionnaire of Healthy Diet (QHOD2), an adapted version of the Mediterranean Diet Screener (aMDS) as used in (47) that was developed by the German Institute of Human Nutrition (DIfE), will be used to measure the frequency of intake of characteristic food groups in the last seven days. To provide nutrient intake data, the 24-h dietary recall myfood24 (48) will be used, in each case three times within a time period of two to three weeks (two weekdays, one weekend day).

### *Health economic outcomes*

Health economic parameters will be assessed to determine the efficiency of the intervention by comparing the cost and outcome of the IG to the CG. All direct costs associated with the intervention as well as costs resulting from the consumption of health-related goods and services (49) and indirect costs due to productivity losses will be considered from the perspective of the German statutory health insurance and the society.

To determine efficiency of the intervention, a cost-effectiveness analysis will be performed in terms of additional costs per additional relapse or T2 lesion (clinical endpoint) averted and a cost-utility analysis, which aims to calculate the additional costs required for an additional improvement in quality-adjusted life years (QALYs). Incremental cost-effectiveness ratio and

1  
2  
3 incremental cost-utility ratio will be calculated as the ratio of the difference in mean costs and  
4 difference in mean outcomes between IG and CG. QALYs will be measured by a well-  
5 established preference based quality of life instrument (EQ-5D-5L) and evaluated by a German  
6 tariff to generate utilities (43). A standardised instrument (50) will be used to record the  
7 healthcare consumption of study participants focusing mainly on outpatient doctor visits, visits  
8 to other health service providers, sick days, hospital stays and MS immune medication.  
9 Productivity losses will be estimated using the human capital approach (51). 95% confidence  
10 intervals for the outcome of the analyses will be determined non-parametrically based on the  
11 distribution characteristics of costs using bootstrap procedures (52). Univariate and  
12 probabilistic sensitivity analyses will be performed and cost-effectiveness acceptance curves  
13 will be executed to take into account uncertainty (53).

### 17 **Participant timeline**

18 The time schedule is depicted in Figure 1.

19 *Figure 1: Participant timeline*

### 23 **Sample size**

24 Based on effect sizes resulting from an RCT for a stress management intervention (13) as well  
25 as data from cohorts on lesion development after an initial clinical event ((54), personal  
26 communication Michael Scheel, Charité Berlin), one event (relapse or at least one new T2  
27 lesion) is expected in every second PwMS within 12 months in the CG. 100 events result in a  
28 statistical power of 85% for a two-way significance level test of 5% and an assumed hazard  
29 ratio of 0.55, i.e. a reduction of 45% by IG compared to the CG. Thus, with a mean observation  
30 time of 12 months, the 100 events required can be expected to be observed in 262 PwMS (131  
31 per group). Assuming about 20% dropouts over one year, 328 PwMS will be randomised (164  
32 per group, 20% dropout = 33 = 131 per group). A sample size recalculation will be performed  
33 after 12 months to review the assumptions on event rates and dropouts (55). If necessary, the  
34 number of cases will be increased to a maximum of 450 PwMS.

### 39 **Recruitment**

40 Eligible MS centres will be recruited by the coordinating centre in Hamburg (University  
41 Medical Center Hamburg-Eppendorf, UKE). Recruitment and inclusion of PwMS will take  
42 place in the participating MS centres through neurologists. In addition, POWER@MS1 will be  
43 advertised on the website of the DMSG. Overall, a recruitment period of 12 months is assumed  
44 with approx. 20 PwMS per centre, with one to two PwMS per month. Reasons for rejection will  
45 be documented.

### 49 **Allocation**

50 Group assignment will be undertaken externally and in a concealed manner through the  
51 electronic data capture system secuTrial® to prevent any manipulation of persons involved in  
52 the study. Eligible study participants will be randomised into the IG or to the CG in blocks (1:1  
53 allocation ratio) through a computer-generated system in secuTrial®. After baseline  
54 documentation and subsequent randomisation, PwMS will be provided with access (login)  
55 details to the IG or CG programme by an unblinded member of the study team.

### 59 **Blinding**



1  
2  
3 The study will be conducted as an investigator blinded trial and participating MS centres will  
4 not be provided with any information about group assignment of a given PwMS. Blinding of  
5 the trial participants is pursued, but only possible to a limited extent. Participants and  
6 neurologists might realize their participation in the IG during encounters.  
7

### 8 **Data collection methods**

9  
10 Data will be obtained at different time points using paper-based and web-based questionnaires  
11 (see Table 1). In case of missing data, participants will be contacted by a member of the UKE.  
12 All study relevant data will be entered into secuTrial® and provided online. Results of MRI  
13 scans (image data) will be saved on CD. In accordance with current procedures implemented  
14 in medical practice, CDs with MRI data will be sent to the study centre in sealed envelopes via  
15 regular mail. This has been reviewed and accepted by the reviewing ethics committees and is  
16 in compliance with current data protection rules and regulations in Germany. They will be  
17 quality-checked, pseudonymised and uploaded in a protected reading centre database. Data  
18 obtained with regard to nutrition behaviour will be collected via secured online-platforms of  
19 the Humanstudienzentrum of the DiE and Dietary Assessment Limited (University of Leeds  
20 spinout company), which act in accordance with EU General Data Protection Regulation  
21 (Datenschutz-Grundverordnung, DSGVO). Data obtained through myfood24 will be stored on  
22 a server in the Netherlands, with a backup in the UK. After data collection, data will be  
23 transferred to secuTrial® and connected with the existing datasets. In addition, usage of the  
24 web-based programmes will be monitored.  
25  
26  
27  
28  
29

### 30 **Data management**

31  
32 The IG and CG programme will be provided via a secure online platform that meets all legal  
33 requirements (SSL Encryption). All study data will be used and evaluated pseudonymously.  
34 However, all participating MS centres will have a list with names and assigned pseudonyms.  
35 All electronic and paper-based data material will be stored at the UKE for a maximum period  
36 of ten years and will be destroyed subsequently. Stored CDs containing MRI images will be  
37 destroyed directly after analysis of the study data. In case of withdrawn consent, pseudonymised  
38 data will be anonymised. A deletion of already anonymized data is not possible.  
39  
40

### 41 **Statistical methods**

42  
43 The effect on the primary endpoint will be estimated in a Cox proportional hazards regression  
44 that, in addition to treatment, also includes study centre as a factor; it will be reported as hazard  
45 ratio (HR) with 95% confidence interval and p-value testing the null hypothesis  $H_0: HR=1$ .  
46 Kaplan-Meier curves of the primary endpoint for both groups will be used to illustrate the  
47 treatment effect.  
48  
49

50 Secondary endpoints will be analysed using mean comparisons between IG and CG with  
51 adjustment for the baseline assessments and centre in analysis of covariance (ANCOVA)  
52 models. Least squares group differences will be reported with 95% confidence intervals and p-  
53 values testing the null hypothesis of no intervention effect. The number of portions/day or week  
54 for different food groups will be analysed, evaluated and compared to current  
55 recommendations. Data obtained through the 24h recall (myfood24) will be used to analyse  
56 intake of selected nutrients of interest comparing mean changes in intake from baseline to post  
57 intervention between IG and CG, adjusting for baseline intake. MRI lesion counts will be  
58  
59  
60

1  
2  
3 analysed using negative binomial regression models adjusting for baseline MRI and centre.  
4 Adverse events will be summarized as frequencies and percentages by treatment group.  
5

6 In addition, subgroup and moderator variable analysis is planned to be performed (e.g. early  
7 therapy vs no therapy and women vs men).  
8

9 Reasons for study withdrawal will be reported. In case of missing data, all PwMS will be  
10 analysed in the group they were randomised to (intention-to-treat analysis). Early study  
11 discontinuations will be treated as independent right censoring in the primary analysis. In case  
12 of substantial or differential study discontinuations, the validity of the independent censoring  
13 assumption will be explored in shared random effects models of the primary endpoint and time  
14 to study discontinuation. To handle missing data in baseline variables or follow-up assessments,  
15 multiple imputation models will be applied.  
16  
17

18 All details of the statistical analyses including definitions of analysis populations will be  
19 prespecified in a statistical analysis plan.  
20  
21

## 22 **Monitoring**

23 As part of a risk-based quality management, external independent data monitoring including  
24 onsite visits at the UKE and remote data checks in secuTrial® will be performed by the contract  
25 research organization CTC North GmbH & Co. KG.  
26  
27

## 28 **Safety and adverse events**

29 As no significant harms (side effects, risks or complications) are to be expected, no stopping  
30 guidelines are planned. The performance of six MRIs over two years is close to clinical standard  
31 and can be regarded as harmless. Contrast media will not be used in order to minimize the risk  
32 of possible contrast media deposition in the basal ganglia, although no information on  
33 depositions is available for the contrast media currently used (56). No auditing trials are planned  
34 or expected.  
35  
36  
37

## 38 **ETHICS AND DISSEMINATION**

39 The study has been approved by the Ethics Committee of the Hamburg Chamber of Physicians  
40 (PV6015) and the ethics committees of participating study centres. The trial was registered at  
41 ClinicalTrials.gov (NCT03968172).  
42  
43

44 Informed consent (see Appendix II) will be obtained by the participating MS centres and a copy  
45 will be sent to the study centre in Hamburg. Participants may withdraw their consent at any  
46 time. A financial compensation for participation in this study cannot be granted. In case of  
47 reaching the primary endpoint, PwMS are requested to remain in the study and continued access  
48 to the web tools will be guaranteed until the study end. Only the study team (investigators) and  
49 Alexander Stahmann (medical information scientist at the German MS Registry) will have  
50 access to the final trial dataset. For publications, an anonymized data set will be used. If  
51 possible, an anonymized data set will be made available in the publication process in order to  
52 disseminate the study results.  
53  
54  
55

56 Trial results will be communicated at scientific conferences and meetings (e.g. at the yearly  
57 German Neurologists Society, the RIMS network) by the investigators and presented on the  
58 DMSG website and other relevant patient websites. Authorship will be shared between persons  
59 involved in the study following the current guidelines of the International Committee of  
60

1  
2  
3 Medical Journal Editors (ICMJE). Professional writers and persons not directly involved in the  
4 study will not be granted authorship.  
5

## 6 **DISCUSSION**

7  
8 This will be the first study assessing the impact of a lifestyle management programme combined  
9 with EBPI on inflammatory activity in MS. If successful, POWER@MS1 has a paradigm  
10 shifting potential. If successful, the trial could give lifestyle management a label as putative  
11 disease-modifying. This can impact guideline development.  
12  
13

### 14 **Current trial status**

15  
16 Recruitment of PwMS has started in July 2019.  
17

18 **Abbreviations** aMDS: adapted Mediterranean Diet Screener; BSA: Bewegungs- und  
19 Sportaktivität Fragebogen (Physical Activity, Exercise, and Sport Questionnaire); CBT:  
20 cognitive behavioural therapy; CG: control group; CIS: clinically isolated syndrome; CNS:  
21 central nervous system; CPS: Control Preference Scale; CSES: Coping Self-efficacy Scale;  
22 DiFe: Deutsches Institut für Ernährungsforschung (German Institute of Human Nutrition);  
23 DMSG: Deutsche Multiple Sklerose Gesellschaft (German Multiple Sclerosis Society);  
24 DSGVO: Datenschutz-Grundverordnung; EBBC: evidence-based behaviour change; EBPI:  
25 evidence-based patient information; EDSS: Expanded-Disability-Status-Scale; GLTEQ: Godin  
26 Leisure-Time Exercise Questionnaire; HADS: Hospital Anxiety and Depression Scale; HAPA:  
27 Health Action Process Approach; HAQUAMS: Hamburg Quality of Life in MS Scale; ICER:  
28 incremental cost-effectiveness ratio; HR: hazard ratio; ICMJE: International Committee of  
29 Medical Journal Editors; ICUR: incremental cost-utility ratio; IG: intervention group; MRC:  
30 Medical Research Council; MRI: magnetic resonance imaging; MS: multiple sclerosis; PAM:  
31 Patient Activation Measure; QALY: quality-adjusted life year; PwMS: persons with multiple  
32 sclerosis; RCT: randomised controlled trial; UKE: Universitätsklinikum Hamburg-Eppendorf  
33 (University Medical Center Hamburg-Eppendorf)  
34  
35  
36  
37

38 **Contributors** CH is the principal investigator and led the planning and development of the full  
39 study with support from NK, KRL, TS, AR, JP, JS, SK, TF, SMG and HT. NK and CH wrote  
40 the first draft of the paper. TF specifically revised the statistical analyses sections of this paper.  
41 AI and MV provided health economic expertise. MVDL contributed as a PwMS expert. All  
42 authors conceived the study, revised the manuscript for relevant scientific content, and  
43 approved the final version.  
44  
45

46 **Funding** This investigator initiated study is publicly funded by the Innovationsfonds,  
47 Innovationsausschuss beim Gemeinsamen Bundesausschuss, Wegelystraße 8, 10623 Berlin,  
48 Germany (01VSF17015). The funding body is not involved in any study related aspect.  
49

50  
51 **Competing interests** CH has received research grants, speaker honoraria and travel grants from  
52 Biogen, Celgene, Genzyme, Merck, Roche. JPS receives research funding from Deutsche  
53 Forschungsgemeinschaft and reports grants from Biogen and Genzyme outside the submitted  
54 work. TF reports personnel fees from Bayer, BiosenseWebster, Boehringer Ingelheim, CSL  
55 Behring, Daiichi Sankyo, Enanta, Fresenius Kabi, Galapagos, Immunic, Janssen, LivaNova,  
56 Novartis, Relaxera, Roche, and Vifor; all outside this work.  
57  
58

59 **Patient consent** Not required.  
60

1  
2  
3 **Ethics approval and trial registration** The study has been approved by the Ethics Committee  
4 of the Hamburg Chamber of Physicians (PV6015) and all relevant local ethics boards. The trial  
5 was prospectively registered at Clinicaltrials.gov (NCT03968172). Important and major  
6 protocol modifications and amendments will have to be approved and reported to all relevant  
7 ethical committees. In addition, all changes will be noted in the study registration.  
8  
9

10 **Provenance and peer review** Not commissioned; externally peer reviewed.  
11

12 **Open Access** This is an Open Access article distributed in accordance with the Creative  
13 Commons Attribution Non Commercial (CC BY-NC 4.0) license, which permits others to  
14 distribute, remix, adapt, build upon this work non-commercially, and license their derivative  
15 works on different terms, provided the original work is properly cited and the use is non-  
16 commercial. See: <http://creativecommons.org/licenses/by-nc/4.0/>  
17  
18  
19  
20  
21  
22  
23  
24  
25  
26  
27  
28  
29  
30  
31  
32  
33  
34  
35  
36  
37  
38  
39  
40  
41  
42  
43  
44  
45  
46  
47  
48  
49  
50  
51  
52  
53  
54  
55  
56  
57  
58  
59  
60

For peer review only

## REFERENCES

1. Petersen G, Wittmann R, Arndt V, Gopffarth D. [Epidemiology of multiple sclerosis in Germany: regional differences and drug prescription in the claims data of the statutory health insurance]. *Nervenarzt*. 2014;85(8):990-8.
2. Thompson AJ, Banwell BL, Barkhof F, Carroll WM, Coetzee T, Comi G, et al. Diagnosis of multiple sclerosis: 2017 revisions of the McDonald criteria. *Lancet Neurol*. 2018;17(2):162-73.
3. Rahn AC, Köpke S, Schiffmann I, Stellmann JP, Mühlhauser I, Lukas C, et al. Magnetic resonance imaging as a prognostic disability marker in clinically isolated syndromes: A systematic review. *Acta Neurologica Scandinavica*. 2018;139(2).
4. Chalfant AM, Bryant RA, Fulcher G. Posttraumatic stress disorder following diagnosis of multiple sclerosis. *Journal of traumatic stress*. 2004;17(5):423-8.
5. Tramacere I, Del Giovane C, Salanti G, D'Amico R, Filippini G. Immunomodulators and immunosuppressants for relapsing-remitting multiple sclerosis: a network meta-analysis. *Cochrane Database Syst Rev*. 2015(9):Cd011381.
6. Filippini G, Del Giovane C, Clerico M, Beiki O, Mattoscio M, Piazza F, et al. Treatment with disease-modifying drugs for people with a first clinical attack suggestive of multiple sclerosis. *Cochrane Database Syst Rev*. 2017;4:Cd012200.
7. Gold R. Diagnose und Therapie der Multiplen Sklerose: Deutsche Gesellschaft für Neurologie; 2015 [Available from: <https://www.dgn.org/leitlinien/2333-II-31-2012-diagnose-und-therapie-der-multiplen-sklerose>].
8. Hansen K, Schüssel K, Kieble M, Werning J, Schulz M, Friis R, et al. Adherence to Disease Modifying Drugs among Patients with Multiple Sclerosis in Germany: A Retrospective Cohort Study. *PloS one*. 2015;10(7):e0133279.
9. Artemiades AK, Anagnostouli MC, Alexopoulos EC. Stress as a risk factor for multiple sclerosis onset or relapse: a systematic review. *Neuroepidemiology*. 2011;36(2):162-73.
10. Marrie RA, Leung S, Tyry T, Cutter GR, Fox R, Salter A. Use of eHealth and mHealth technology by persons with multiple sclerosis. *Mult Scler Relat Disord*. 2018;27:13-9.
11. Beckett JM, Bird ML, Pittaway JK, Ahuja KD. Diet and Multiple Sclerosis: Scoping Review of Web-Based Recommendations. *Interact J Med Res*. 2019;8(1).
12. Ngandu T, Lehtisalo J, Solomon A, Levälähti E, Ahtiluoto S, Antikainen R, et al. A 2 year multidomain intervention of diet, exercise, cognitive training, and vascular risk monitoring versus control to prevent cognitive decline in at-risk elderly people (FINGER): a randomised controlled trial. *The Lancet*. 2015;385(9984):2255-63.
13. Mohr DC, Lovera J, Brown T, Cohen B, Neylan T, Henry R, et al. A randomized trial of stress management for the prevention of new brain lesions in MS. *Neurology*. 2012;79(5):412-9.
14. Köpke S, et al. e. Information provision for people with multiple sclerosis. *Cochrane Database of Systematic Reviews*. 2018;10(9).
15. Motl RW, Hubbard EA, Bollaert RE, Adamson BC, Kinnett-Hopkins D, Balto JM, et al. Randomized controlled trial of an e-learning designed behavioral intervention for increasing physical activity behavior in multiple sclerosis. *Multiple Sclerosis Journal - Experimental, Translational and Clinical*. 2017;Oct;3(4):2055217317734886.
16. Fischer A, Schroder J, Vettorazzi E, Wolf OT, Pottgen J, Lau S, et al. An online programme to reduce depression in patients with multiple sclerosis: a randomised controlled trial. *Lancet Psychiatry*. 2015;2(3):217-23.
17. Pöttgen J, Lau S, Penner I, Heesen C, Moritz S. Managing Neuropsychological Impairment in Multiple Sclerosis. *International Journal of MS Care*. 2015;17(3):130-7.
18. Craig P, Dieppe P, Macintyre S, Michie S, Nazareth I, Petticrew M. Developing and evaluating complex interventions: the new Medical Research Council guidance. *Int J Nurs Stud*. 2013;50(5):587-92.
19. Michie S, Van Stralen MM, West R. The behaviour change wheel: A new method for characterising and designing behaviour change interventions. *Implement Sci*. 2011;6:42.
20. Michie S, Ashford S, Snihotta FF, Dombrowski SU, Bishop A, French DP. A refined taxonomy of behaviour change techniques to help people change their physical activity and healthy eating behaviours: the CALO-RE taxonomy. *Psychol Health*. 2011;26(11):1479-98.

21. Cane J, O'Connor D, Michie S. Validation of the theoretical domains framework for use in behaviour change and implementation research. *Implement Sci.* 2012;7:37.
22. Werbrouck A, al. e. How to empower patients? A systematic review and meta-analysis. *Translational behavioral medicine.*8:660-74.
23. Twomey C, O'Reilly G, Meyer B. Effectiveness of an individually-tailored computerised CBT programme (Deprexis) for depression: A meta-analysis. *PSYCHIATRY RESEARCH.* 2017;256:371-7.
24. Samdal GB, Eide GE, Barth T, Williams G, Meland E. Effective behaviour change techniques for physical activity and healthy eating in overweight and obese adults; systematic review and meta-regression analyses. *Int J Behav Nutr Phys Act.* 2017;14(1):42.
25. Cavanagh K, Strauss C, Forder L, Jones F. Can mindfulness and acceptance be learnt by self-help?: a systematic review and meta-analysis of mindfulness and acceptance-based self-help interventions. *Clin Psychol Rev.* 2014;34(2):118-29.
26. Fortier MS, Duda J, Guerin E, Teixeira PJ. Promoting physical activity: development and testing of self-determination theory-based interventions. *International Journal of Behavioral Nutrition and Physical Activity.* 2012;9(1):20.
27. Kramer U, Stiles WB. The responsiveness problem in psychotherapy: A review of proposed solutions. *Clinical Psychology: Science and Practice.* 2015;22(3):277-95.
28. Krebs P, Prochaska JO, Rossi JS. A meta-analysis of computer-tailored interventions for health behavior change. *Prev Med.* 2010;51(3-4):214-21.
29. Hawkins RP, Kreuter M, Resnicow K, Fishbein M, Dijkstra A. Understanding tailoring in communicating about health. *Health Educ Res.* 2008;23(3):454-66.
30. Pöttgen J, Moss-Morris R, Wendebourg JM, Feddersen L, Gold SM, Penner IK, et al. Online fatigue management program for patients with multiple sclerosis - a randomized controlled trial. *Mult Scler.* 2015;21(S11):41-2.
31. Zill JM, Meyer B, Topp J, Daubmann A, Harter M, Dirmaier J. Vorvida: study protocol of a randomized controlled trial testing the effectiveness of internet-based self-help program for the reduction of alcohol consumption for adults. *BMC Psychiatry.* 2016;16:19.
32. Berger T, Urech A, Krieger T, Stolz T, Schulz A, Vincent A, et al. Effects of a transdiagnostic unguided Internet intervention ("velibra") for anxiety disorders in primary care: Results of a randomised controlled trial. *Psychological Medicine.* 2017;47(1):67-80.
33. Heesen C, al. e. What should a person with relapsing-remitting multiple sclerosis know? –Focus group and survey data of a risk knowledge questionnaire (RIKNO 2.0). *Mult Scler Relat Disord.* 2017;18:186-95.
34. Degner LF, Sloan JA, Venkatesh P. The Control Preferences Scale. *Can J Nurs Res.* 1997;29(3):21-43.
35. Hibbard J, Stockard J, R Mahoney E, Tusler M. Development of the Patient Activation Measure (PAM): Conceptualizing and Measuring Activation in Patients and Consumers2004. 1005-26 p.
36. Chesney MA, Neilands TB, Chambers DB, Taylor JM, Folkman S. A validity and reliability study of the coping self-efficacy scale. *British journal of health psychology.* 2006;11(Pt 3):421-37.
37. Devilly GJ, Borkovec TD. Psychometric properties of the credibility/expectancy questionnaire. *Journal of behavior therapy and experimental psychiatry.* 2000;31(2):73-86.
38. Schwarzer R, Lippke S, Luszczynska A. Mechanisms of health behavior change in persons with chronic illness or disability: The Health Action Process Approach (HAPA). *Rehabilitation psychology.* 2011;56(3):161-70.
39. Lippke S, Ziegelmann JP, Schwarzer R, Velicer WF. Validity of stage assessment in the adoption and maintenance of physical activity and fruit and vegetable consumption. *Health Psychology & Behavioral Medicine.* 2009;28(2): 183-93.
40. Bann C, Sirois F, Walsh E. Provider Support in Complementary and Alternative Medicine: Exploring the Role of Patient Empowerment2010. 745-52 p.
41. Kurtzke JF. Rating neurologic impairment in multiple sclerosis: an expanded disability status scale (EDSS). *Neurology.* 1983;33(11):1444-52.
42. Gold SM, Heesen C, Schulz H, Guder U, Monch A, Gbadamosi J, et al. Disease specific quality of life instruments in multiple sclerosis: validation of the Hamburg Quality of Life Questionnaire in Multiple Sclerosis (HAQUAMS). *Mult Scler.* 2001;7(2):119-30.

- 1
- 2
- 3 43. Herdman M, Gudex C, Lloyd A, Janssen M, Kind P, Parkin D, et al. Development and
- 4 preliminary testing of the new five-level version of EQ-5D (EQ-5D-5L). *Qual Life Res.*
- 5 2011;20(10):1727-36.
- 6 44. Zigmond AS, Snaith RP. The hospital anxiety and depression scale. *Acta Psychiatr Scand.*
- 7 1983;67(6):361-70.
- 8 45. Shephard R. Godin leisure-time exercise questionnaire. *Med Sci Sports Exerc.* 1997;29(suppl
- 9 6):S36-S8.
- 10 46. Fuchs R, Klaperski S, Gerber M, Seelig H. Messung der Bewegungs- und Sportaktivität mit
- 11 dem BSA-Fragebogen. *Zeitschrift für Gesundheitspsychologie.* 2015;23(2):60-76.
- 12 47. Estruch R, Ros E, Salas-Salvado J, Covas MI, Corella D, Aros F, et al. Primary Prevention of
- 13 Cardiovascular Disease with a Mediterranean Diet Supplemented with Extra-Virgin Olive Oil or Nuts.
- 14 *N Engl J Med.* 2018;378(25):e34.
- 15 48. Wark PA, Hardie LJ, Frost GS, Alwan NA, Carter M, Elliott P, et al. Validity of an online 24-
- 16 h recall tool (myfood24) for dietary assessment in population studies: comparison with biomarkers and
- 17 standard interviews. *BMC Med.* 2018;16(1):136.
- 18 49. Krauth C, Hessel FP, Hansmeier T, Wasem J, Seitz R, Schweiker B. Empirical standard costs
- 19 for health economic evaluation in Germany - a proposal by the working group methods in health
- 20 economic evaluation. *Gesundheitswesen.* 2005;67(10):736-46.
- 21 50. Chernyak N, Ernsting C, Icks A. Pre-test of questions on health-related resource use and
- 22 expenditure, using behaviour coding and cognitive interviewing techniques. *BMC Health Services*
- 23 *Research.* 2012;12:303.
- 24 51. Gold MR, Siegel JE, Russell LB, Weinstein MC. *Cost-effectiveness in health and medicine.*
- 25 New York: Oxford University Press; 1996.
- 26 52. Briggs AH, Wonderling DE, Mooney CZ. Pulling cost-effectiveness analysis up by its
- 27 bootstraps: a non-parametric approach to confidence interval estimation. *Health economics.*
- 28 1997;6(4):327-40.
- 29 53. Fenwick E, O'Brien BJ, Briggs A. Cost-effectiveness acceptability curves--facts, fallacies and
- 30 frequently asked questions. *Health economics.* 2004;13(5):405-15.
- 31 54. Rosenkranz SC, Kaulen B, Neuhaus A, Siemonsen S, Kopke S, Daumer M, et al. Low clinical
- 32 conversion rate in clinically isolated syndrome patients - diagnostic benefit of McDonald 2010 criteria?
- 33 *Eur J Neurol.* 2018;25(2):247-e9.
- 34 55. Friede T, Pohlmann H, Schmidli H. Blinded sample size reestimation in event-driven clinical
- 35 trials: Methods and an application in multiple sclerosis. *Pharmaceutical Statistics.* 2019;18:351-65.
- 36 56. Costa L, Bracco P, Vada S, Trossarelli L, Jacobson K. A chemical analysis of the clogging
- 37 process of polymeric biliary endoprostheses. *Biomaterials.* 2001;22(23):3113-9.
- 38
- 39
- 40
- 41
- 42
- 43
- 44
- 45
- 46
- 47
- 48
- 49
- 50
- 51
- 52
- 53
- 54
- 55
- 56
- 57
- 58
- 59
- 60

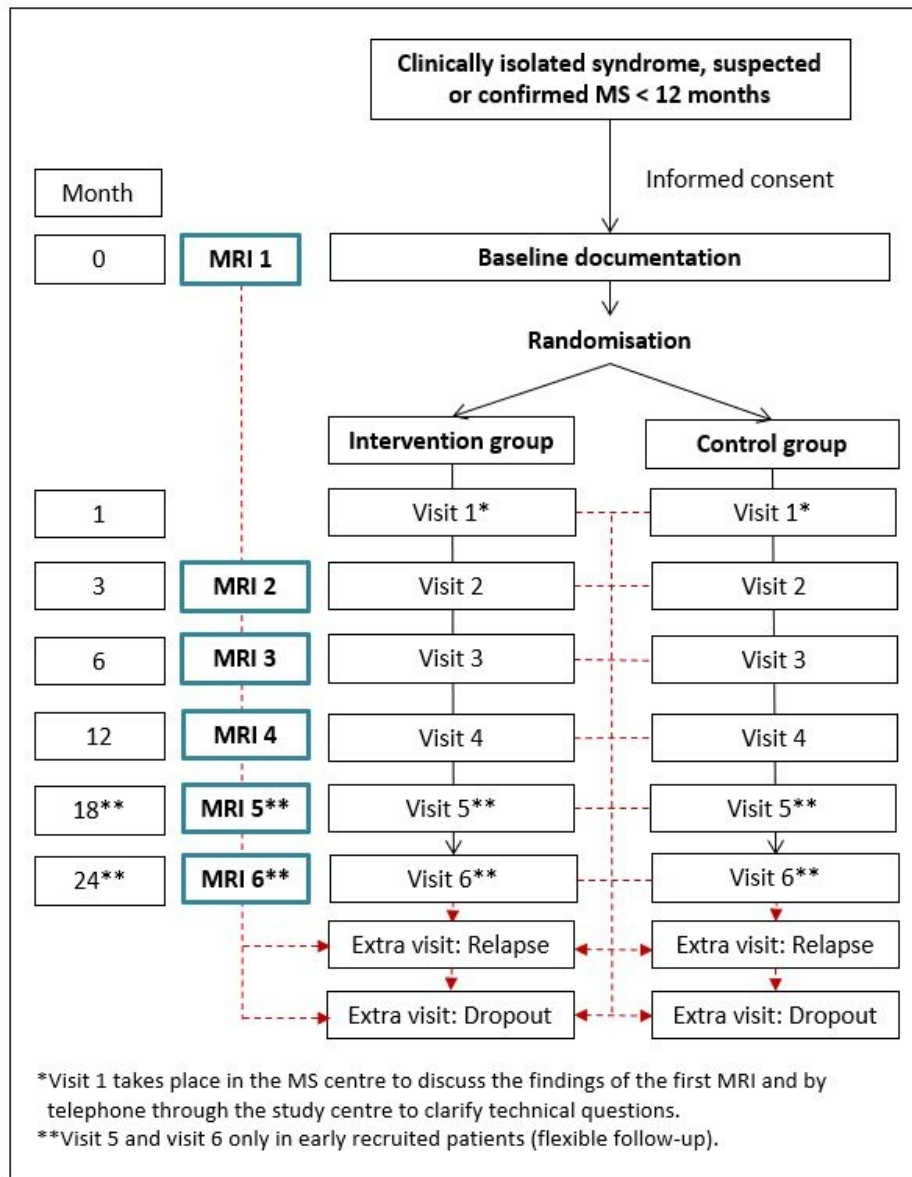

Figure 1: Participant timeline

106x135mm (144 x 144 DPI)



## Appendix I: Process evaluation

A mixed methods approach (1) is used for the process evaluation based on standardised questionnaires and telephone interviews (see Table 2, Figure 2). Further, the outcome assessments of the main study are an important data source for the process evaluation. The process evaluation aims to clarify whether the intervention was delivered as intended (fidelity) and in which quantity (dose) the intervention was implemented (2, 3). Moreover, implementation barriers and facilitators will be explored. As shown in Table 2 and Figure 2, we will assess contextual factors, components associated with recruitment, delivery, responses and maintenance of centres and individuals (PwMS) as well as unintended consequences using different methods.

### *Sampling*

Questionnaires will be provided to all participants. Interviews will be performed with 10 to 20 with PwMS from each study group until information saturation is reached. Of the healthcare providers, up to 10 neurologists and 5 radiologists will be interviewed based on a purposeful sampling strategy, i.e. aiming for a diversity of centres in organisational structure and size.

### *Timing*

The process evaluation will be conducted in parallel to the main trial (see Table 2 for specific timing of assessments).

### *Data analysis*

First, the process evaluation and trial data will be analysed separately. Afterwards, data will be combined and used to determine post-trial interview questions. Quantitative process evaluation data (questionnaires and evaluation forms) will be analysed descriptively using SPSS (International Business Machines Corporation (IBM), Armonk, United States of America) or R (R Development Core Team) software. Subgroup analyses considering study outcomes and patient characteristics will be performed (for example, start of immunotherapy and decision type) in order to explore the impact of the intervention on different groups. Interviews will be analysed by thematic analysis (4) using MAXQDA (5).

### References:

1. Cresswell JW, Plano Clark VL. Designing and Conducting Mixed Methods Research. Sage Publications, Inc. 2010;2.
2. Moore GF, Audrey S, Barker M, Bond L, Bonell C, Hardeman W, et al. Process evaluation of complex interventions: Medical Research Council guidance. *Brit Med J*. 2015;350:h1258.
3. Craig P, Dieppe P, Macintyre S, Michie S, Nazareth I, Petticrew M, et al. Developing and evaluating complex interventions: the new Medical Research Council guidance. *Brit Med J*.
4. Braun V, Clarke V. What can "thematic analysis" offer health and wellbeing researchers? *International journal of qualitative studies on health and well-being*. 2014;9:26152.
5. Kuckartz U, Rädiker S. Analyse qualitativer Daten mit MAXQDA. Springer VS. 2019.

1  
2  
3  
4  
5  
6  
7  
8  
9  
10  
11  
12  
13  
14  
15  
16  
17  
18  
19  
20  
21  
22  
23  
24  
25  
26  
27  
28  
29  
30  
31  
32  
33  
34  
35  
36  
37  
38  
39  
40  
41  
42  
43  
44  
45  
46  
47  
48  
49  
50  
51  
52  
53  
54  
55  
56  
57  
58  
59  
60

| <b>Overview process evaluation POWER@MS1</b> |                                                                                                                                                                               |                                                                                                                                                                                                                            |                              |
|----------------------------------------------|-------------------------------------------------------------------------------------------------------------------------------------------------------------------------------|----------------------------------------------------------------------------------------------------------------------------------------------------------------------------------------------------------------------------|------------------------------|
| <b>Domain</b>                                | <b>Objects of investigation</b>                                                                                                                                               | <b>Ascertainment/Data collection tool</b>                                                                                                                                                                                  | <b>Time point</b>            |
| <b>Context</b>                               | Context factors in Germany (health system)                                                                                                                                    | Description                                                                                                                                                                                                                | Pre-intervention             |
|                                              | Centre-specific structures and processes                                                                                                                                      | Questionnaire, interviews                                                                                                                                                                                                  | Pre-intervention             |
| <b>Recruitment of centres</b>                | Centre recruitment                                                                                                                                                            | Documentation of recruited centres, phone calls or visits in interested centres                                                                                                                                            | Pre-intervention             |
|                                              | Reason for study participation/ for non-participation (promoting factors and barriers)                                                                                        | Questionnaire (neurologists)                                                                                                                                                                                               | Pre- and during intervention |
| <b>Delivery to centres</b>                   | Delivery of information (study management) to neurologists, study nurses and radiologists (participation, reach)                                                              | Provision of study materials about the intervention programme, initiation of study centres                                                                                                                                 | Pre-intervention             |
|                                              | Delivery of the study monitoring platform access to all centres                                                                                                               | Provision of access data                                                                                                                                                                                                   | Pre-intervention             |
| <b>Response of centres</b>                   | Attitude (neurologists, study nurses and radiologists) regarding the study procedures (e.g. administration, recruitment, clinical visits, MRI frequency) and the intervention | Evaluation forms, interviews                                                                                                                                                                                               | During and post-intervention |
| <b>Maintenance of centres</b>                | Study centres: recruitment of patients                                                                                                                                        | Documentation of recruited patients, evaluation forms, interviews                                                                                                                                                          | During and post-intervention |
| <b>Recruitment of individuals</b>            | Recruitment of PwMS                                                                                                                                                           | Information video (provided online via YouTube and stakeholder websites/ social media/ network distributors/ magazines), study information leaflets, recruitment in the centres (screening lists, baseline questionnaires) | Pre-intervention             |
| <b>Delivery to individuals</b>               | <u>Intervention group</u> : delivery of the intervention to individuals (EBPI about lifestyle factors in MS combined with a complex behaviour change programme)               | Provision of access (login) data, e-mail and text message reminders, monitoring of programme usage, evaluation forms, interviews                                                                                           | During and post-intervention |

|                                                                                                                                                                                                                                                        |                                                                                                                                                                                                  |                                                                                                                                                           |                                                        |
|--------------------------------------------------------------------------------------------------------------------------------------------------------------------------------------------------------------------------------------------------------|--------------------------------------------------------------------------------------------------------------------------------------------------------------------------------------------------|-----------------------------------------------------------------------------------------------------------------------------------------------------------|--------------------------------------------------------|
|                                                                                                                                                                                                                                                        | <u>Control group</u> : delivery of the control intervention to individuals (web-based information on lifestyle factors consisting of optimised standard care material)                           | Provision of access (login) data, e-mail and text message reminders, monitoring of programme usage, evaluation forms, interviews                          | During and post-intervention                           |
| <b>Response of individuals</b>                                                                                                                                                                                                                         | E.g.: Satisfaction with the study procedures (e.g. frequency of MRIs and clinical visits) and the intervention, knowledge, attitude, empowerment, change in behaviour, barriers and facilitators | Questionnaires (primary and secondary endpoints RCT), evaluation forms, interviews                                                                        | Post-intervention, after reaching the primary endpoint |
| <b>Maintenance of individuals</b>                                                                                                                                                                                                                      | <u>PwMS</u> (users of the programme): knowledge, empowerment, change in behaviour and reasons for usage                                                                                          | Questionnaires (primary and secondary endpoints RCT), evaluation forms, interviews                                                                        | During and post-intervention                           |
|                                                                                                                                                                                                                                                        | <u>PwMS</u> (non-user of the programme): knowledge, empowerment, change in behaviour and reasons for non-usage                                                                                   | Contacting participants via e-mail or telephone, questionnaire, interviews                                                                                | During and post-intervention                           |
| <b>Unintended consequences</b>                                                                                                                                                                                                                         | <u>Patients</u> : anxiety, depression, negative impact on disease specific quality of life                                                                                                       | Evaluation form, interviews, secondary outcome measurement                                                                                                | During and post-intervention                           |
|                                                                                                                                                                                                                                                        | <u>Neurologists</u> : professional relationship to patients, barriers for implementation                                                                                                         | Evaluation form, interviews                                                                                                                               | During and post-intervention                           |
|                                                                                                                                                                                                                                                        | <u>Study nurses</u> : stress, professional relationship to patients, barriers for implementation                                                                                                 | Evaluation form, interviews                                                                                                                               | During and post-intervention                           |
| <b>Theory</b>                                                                                                                                                                                                                                          | EBPI, TDF, TPB, Empowerment                                                                                                                                                                      | Application during study planning and the development of study materials, used in evaluation forms, in the programme and in secondary outcome measurement | Pre-, during and post-intervention                     |
| EBPI = evidence-based patient information; MRI = magnetic resonance imaging; MS = Multiple Sclerosis; PwMS = Persons with Multiple Sclerosis; RCT = randomised controlled trial; TDF = Theoretical Domains Framework; TPB = Theory of Planned Behavior |                                                                                                                                                                                                  |                                                                                                                                                           |                                                        |

Table 2: Overview process evaluation POWER@MS 1

Figure 2: Process evaluation POWER@MS1: questions and methods

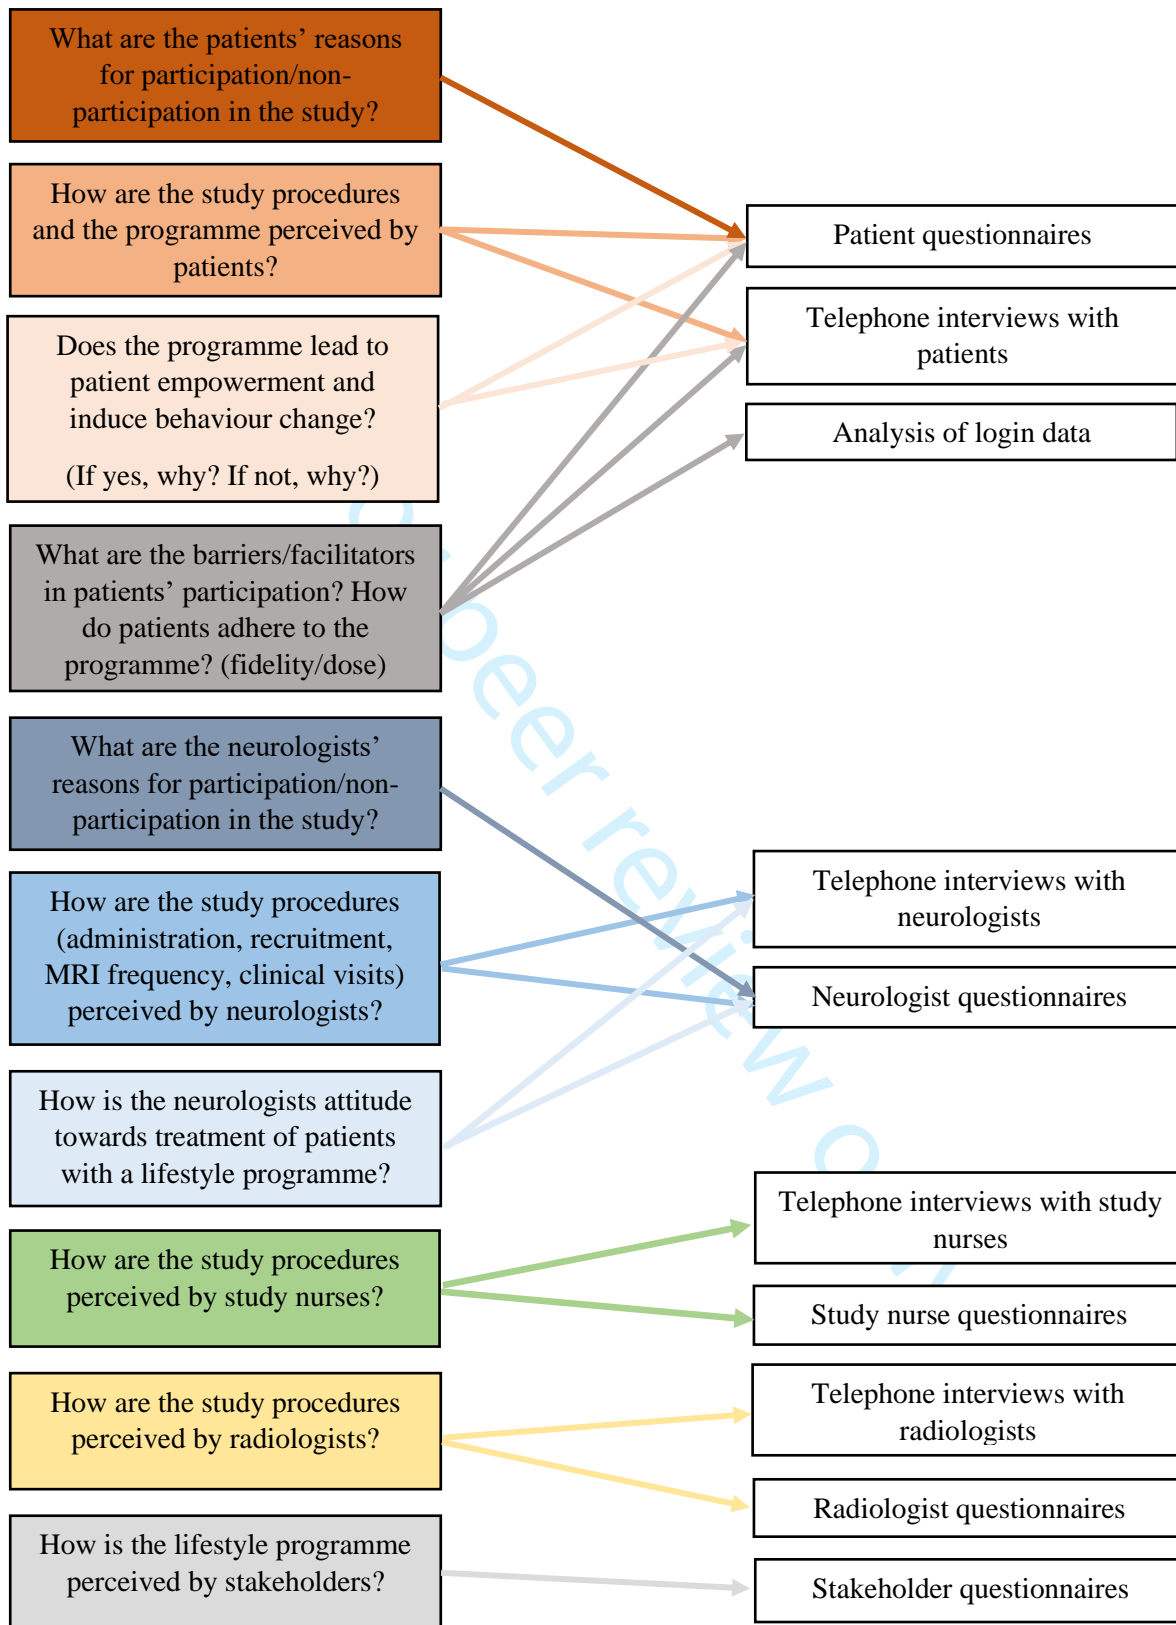

## Appendix II: Model consent form



Klinik und Poliklinik für Neurologie  
Institut für Neuroimmunologie und Multiple Sklerose (INIMS)

Universitätsklinikum Hamburg-Eppendorf | Martinistraße 52 | 20246 Hamburg  
Klinik und Poliklinik für Neurologie | Institut für Neuroimmunologie und Multiple Sklerose (INIMS)

Prof. Dr. Christoph Heesen  
Leiter MS-Tagesklinik

Martinistraße 52  
20246 Hamburg

MS-Tagesklinik  
Gebäude W34  
Telefon: +49 (0) 40 7410-54076  
Fax: +49 (0) 40 7410-56973  
multiplesklerose@uke.de  
www.inims.de  
www.uke.de

### Patienteninformation zur Studie „POWER@MS1“ – RCT (Version 1.3)

**Ansprechpartnerinnen: Nicole Krause, Tanja Steffen**  
**Kontakt: [powerms1@uke.de](mailto:powerms1@uke.de)**

Hamburg, 15.06.2020  
Seite 1/8

### Information und Einwilligung zur Studie:

#### Interaktive Webplattform zum EmPOWERment bei früher Multipler Sklerose (POWER@MS1) – Randomisiert kontrollierte Studie (RCT)

Sehr geehrte Studieninteressent\*innen,

das Institut für Neuroimmunologie und Multiple Sklerose sowie der Bundesverband der Selbsthilfe (DMSG) danken Ihnen für Ihr Interesse an unserer Studie zum webbasierten Empowerment für Menschen mit Multipler Sklerose (MS). Die Studie wird öffentlich durch den Innovationsfond beim gemeinsamen Bundesausschuss (G-BA) gefördert.

Bitte lesen Sie diese Studieninformation sorgfältig durch. Ihre Ärztin oder ihr Arzt wird mit Ihnen auch direkt über die Studie sprechen. Bitte fragen Sie diesen oder diese oder kontaktieren Sie den unten genannten Studienleiter Prof. Dr. med. Christoph Heesen oder die Studienkoordinatorinnen Nicole Krause und Tanja Steffen, wenn Sie etwas nicht verstehen oder wenn Sie zusätzlich etwas wissen möchten.

#### Was ist das Ziel dieser Studie?

Bei Ihnen ist kürzlich ein MS Verdacht geäußert oder auch eine MS Diagnose gestellt worden. Diese Diagnose stellt für viele Patienten eine erhebliche Verunsicherung dar. Fragen die viele umtreiben sind zum Beispiel:

Wie sicher ist die Diagnose?

Werde ich einen eher gutartigen oder aktiveren Verlauf haben?

Brauche ich eine ganz frühe Immuntherapie?

Was kann ich tun, außer Medikamente zu nehmen?



1  
2  
3 Diese Fragen können im Rahmen von Arztbesuchen, beim Neurologen, nur begrenzt diskutiert  
4 werden. Im Internet gibt es eine Fülle von Informationen, deren Qualität oft zweifelhaft ist. Um  
5 Sie im ersten Jahr Ihrer MS Diagnose zu begleiten, haben wir verschiedene Materialien ent-  
6 wickelt, die Sie darin unterstützen sollen, einen eigenen Weg mit der Erkrankung zu finden.  
7  
8

9 Das Ziel dieser Studie ist es zu klären, ob diese von uns entwickelten und über das Internet  
10 bereit gestellten Materialien hilfreich sind. Im Verlauf von bis zu 2 Jahren wird insbesondere  
11 die Aktivität der MS im MRT (=Magnetresonanztomografie), mit Untersuchungen alle 6 Mo-  
12 nate, sehr genau untersucht werden. Darüber hinaus erhalten Sie mehrmals Fragebögen zu  
13 möglichen Beeinträchtigungen, zu Ihrer Stimmungslage, aber auch zu Lebensstilfaktoren wie  
14 Ihrer sportlichen Aktivität und Ihren Ernährungsgewohnheiten.  
15  
16

### 17 **Auf was müssen Sie sich als Teilnehmer/in einstellen?**

18  
19  
20 In der Studie werden, in zwei Gruppen, unterschiedliche Informationsstrategien zu Lebensstil-  
21 faktoren verglichen. Die Zuordnung zu einer der Gruppen erfolgt zufällig (randomisiert). Wenn  
22 Sie sich für die Teilnahme entscheiden, erhalten Sie einen Zugangscode (Login) für eine In-  
23 ternetseite mit Informationen und Schulungsmaterialien. Dort melden Sie sich mit einer E-Mail-  
24 Adresse und einem selbst gewählten Passwort an. Die Webseite wird Ihnen über einen neut-  
25 ralen E-Mailabsender (ohne Bezug zur MS), in zeitlichen Abständen, immer wieder Informati-  
26 onen und Erinnerungen schicken. Auch per SMS können Sie auf eigenen Wunsch angespro-  
27 chen werden. In diese Kontaktaufnahmen müssen Sie einwilligen. Dabei müssen Sie beden-  
28 ken, dass jegliche Kommunikation über das Internet möglicherweise von Unbefugten abgehört  
29 werden kann und ein nicht sicher kalkulierbares Risiko besteht, dass bei der Nutzung von  
30 Internetplattformen Dritte an die eingegebenen Informationen gelangen können. Die Wahr-  
31 scheinlichkeit, dass Ihnen damit jemand schadet ist jedoch sehr gering.  
32  
33  
34

35 Wenn Sie innerhalb von 3 Monaten vor Studienbeginn ein geeignetes MRT bekommen haben,  
36 kann dieses für die Studie genutzt werden. Sollte kein geeignetes MRT vorliegen, erfolgt ein  
37 MRT zu Studienbeginn und nach 3, 6 und 12 Monaten. Für einen Teil der Patienten, die sehr  
38 früh eingeschlossen werden, erfolgen weitere MRTs zu Monat 18 und 24. Hier sollten die Auf-  
39 nahmen bestenfalls immer am gleichen Gerät, in der gleichen Praxis erfolgen. Eine Kopie der  
40 Bilder wird an die Studienzentrale in Hamburg gesendet werden. Aufgrund der Anzahl an stu-  
41 dienbedingten MRT-Untersuchungen entsteht durch die Teilnahme an der POWER@MS1  
42 Studie ein zusätzlicher Zeitaufwand für Sie. Da das Verwenden von Kontrastmittel im Rahmen  
43 der Studie nicht notwendig ist, bestehen für Sie aber keine Risiken aufgrund der zusätzlichen  
44 MRT-Untersuchungen.  
45  
46  
47

48  
49 Zu Beginn der Studie und nach 12 Monaten erfolgt eine umfangreichere Erhebung mit Frage-  
50 bogenmaterialien, aber auch im Verlauf der Studie (maximal 2 Jahre) benötigen wir Ihre Mit-  
51 arbeit in Form der Bearbeitung von Fragebogenmaterial. Dies stellen wir entweder in Papier-  
52 form mit Rücksendeumschlag zur Verfügung oder über ein persönliches Login im Internet für  
53 die gesicherte Forschungsdatenbank des MS-Registers der Deutschen Multiple Sklerose Ge-  
54 sellschaft (DSMG, Bundesverband e.V.), welche zur elektronischen Abbildung dieser Studie  
55 genutzt wird. Die Forschungsdatenbank wird von der MS Forschungs- und Projektentwick-  
56 lungs-gGmbH in Hannover, einer 100%igen Tochter der DMS-Stiftung der DSMG, auf Servern  
57 in Deutschland betrieben. Das Ernährungsverhalten untersuchen wir mit zwei internetbasier-  
58 ten Erhebungsinstrumenten. Eines dieser Instrumente wird über eine gesicherte Online-Platt-  
59  
60

form des Humanstudienzentrums des Deutschen Instituts für Ernährungsforschung (DIfE) verwaltet. Das zweite Instrument wird von der Dietary Assessment Ltd (ein Spin-Out-Unternehmen der Universität Leeds) verwaltet, welche die erhaltenen Daten auf einem Server in den Niederlanden, mit einem Backup in England speichert. Beide Einrichtungen handeln in Übereinstimmung mit der Datenschutz-Grundverordnung (DSGVO) der EU und verarbeiten die Daten in pseudonymisierter Form (das heißt mit einem Code, ohne direkte Verbindung zu Ihrem Namen). Die Links zu den Ernährungserhebungen werden Ihnen über die Studien-E-Mail (powerms1@uke.de) von Mitarbeitern/innen der Studienzentrale in Hamburg zugesendet. Zum Schluss der Studie möchten wir noch mit einigen Teilnehmerinnen und Teilnehmern Interviews durchführen, die aufgezeichnet und verschriftlicht werden. Nach Beendigung der Studie werden die Tonaufnahmen der Interviews vernichtet. Hierzu werden Sie gesondert angesprochen und es erfolgt eine extra Einwilligung dafür.

### Wer kann teilnehmen?

Sie können an der Studie teilnehmen, wenn:

1. Bei Ihnen im letzten Jahr eine MS Verdachtsdiagnose oder definitive Diagnose einer schubförmigen MS gestellt wurde.
2. Sie seit mindestens 6 Monaten keine Immuntherapie erhalten und in den nächsten 3 Monaten keine Immuntherapie geplant ist.
3. In den letzten 4 Wochen keine Cortisontherapie erfolgte und sie nicht schwanger sind.
4. Im Kernspin des Kopfes und Rückens mindestens 2 Entzündungsherde zu sehen sind.
5. Sie einen Internetzugang und ein internetfähiges Gerät (z.B. Laptop oder Tablet) haben.
6. Sie zwischen 18 und 65 Jahre alt sind.

### Gibt es Risiken?

Risiken, jenseits der oben genannten zur Datensicherheit, liegen nicht vor.

### Was passiert, wenn ich einen Schub habe oder neue Herde im MRT erscheinen?

Im Falle eines Schubes müssen Sie Ihren behandelnden Arzt aufsuchen. Dieser wird mit Ihnen zum einen über eine Schubtherapie und zum anderen über eine MS Immuntherapie entscheiden. Genauso liegt, bei Nachweis neuer Herde im MRT, eine Immuntherapieentscheidung an. Dabei kann die Entscheidung auch vertagt werden oder auch eine Entscheidung gegen eine Therapie gefällt werden. Direkt nach diesem Entscheidungsgespräch erfolgt, arzt- und patientenseitig, eine Bewertung. Zusätzlich möchten wir in diesem Fall aus der Studienzentrale eine kurze telefonische Befragung, innerhalb von 4 Wochen, mit Ihnen durchführen.

### Was passiert mit meinen Daten?

Ihre Kontaktdaten werden an die Studienzentrale in Hamburg übermittelt. Ihre E-Mail-Adresse und Mobilfunknummer werden im Programm POWER@MS1 hinterlegt. Das Programm erinnert Sie regelmäßig, wenn neue Materialien für Sie bereit liegen. Dieser Kontakt erfolgt primär per E-Mail oder SMS. Ferner kann es sein, dass Sie kurze Verhaltenstipps per E-Mail oder SMS erhalten. Aus Datenschutzgründen sind E-Mail-Absender über das Programm so allgemein gehalten, dass nicht auf die MS rückgeschlossen werden kann. Hier müssen Sie darauf achten, dass die Nachrichten nicht im Spam-Ordner verschwinden. Zusätzlich kann es sein, dass Sie über die Studien-E-Mail (powerms1@uke.de) von Mitarbeitern/innen der Studien-

zentrale in Hamburg kontaktiert werden, mit der Bitte, bestimmte Studienfragen zu beantworten. Alle Patientendaten werden bis zum Studienende pseudonymisiert in einer Datenbank des deutschen MS-Registers gesammelt. Parallel dazu werden die Kernspindaten in Hamburg pseudonymisiert ausgewertet. Beide Datenbanken werden am Studienende verbunden und zusammen ausgewertet.

Zusätzlich werden die Zugriffszeiten auf der Studienwebsite erfasst, sodass wir abschätzen können, wie intensiv Sie sich mit den Materialien befasst haben. Diese Daten werden, wie alle anderen Daten, pseudonymisiert ausgewertet.

Nach Abschluss der Auswertung werden die Daten (inklusive Audiodaten) in Hamburg am INIMS auf einem geschützten Computer, über einen Zeitraum von 10 Jahren, sicher gelagert und anschließend vernichtet. Mit Ihrer Einwilligung werden darüber hinaus Ihre MS-bezogenen Daten in der Forschungsplattform des MS-Registers gespeichert (siehe Extraeinwilligung MS-Register). Ihre Einwilligung und die Teilnahme Ihres Zentrums am MS-Register vorausgesetzt, werden Ihre Daten gemeinsam mit dem Gesamtdatenbestand des MS-Registers, entsprechend Ihrer Einwilligung, ausgewertet. Die Daten können darüber hinaus der wissenschaftlichen Öffentlichkeit zugänglich gemacht werden, damit unsere Ergebnisse überprüft und gegebenenfalls auch mit anderen Ergebnissen verglichen werden können. Dazu werden die Daten anonymisiert, sodass keine Identifizierung mehr möglich ist. Stimmen Sie im Falle des Widerrufs Ihrer Einwilligungserklärung einer Weiterverwendung Ihrer sicher anonymisierten Daten nicht zu, ist eine Teilnahme an der Studie nicht möglich.

### **Teilnahme, Haftung, Versicherung, Aufwandsentschädigung**

Die Teilnahme an der Studie ist freiwillig. Sie können Ihre Einwilligung jederzeit und ohne Angabe von Gründen widerrufen, ohne dass dadurch Nachteile für Sie entstehen.

Da es sich nicht um eine Studie zur Prüfung eines neuen Arzneimittels oder Medizinproduktes oder eines neuen Anwendungsgebietes handelt, ist keine besondere Studienversicherung (Probandenversicherung) zur Gefährdungshaftung vorgesehen. Es gelten die allgemeinen Haftungsgrundsätze.

Die wissenschaftliche Leitung hat Prof. Dr. med. Christoph Heesen (Telefon: 040-7410-53776). Die Studienkoordinatorin ist Nicole Krause (Telefon: 040-7410-54077). Sollten Sie noch weitere Fragen haben, stehen Ihnen der Versuchsleiter und die Studienkoordinatorin zur Beantwortung gerne zur Verfügung.

Für die Teilnahme an dieser Studie können keinerlei finanzielle Aufwandsentschädigungen gewährt werden.

***Wir würden uns sehr freuen, wenn Sie dieses Projekt durch Ihre Teilnahme unterstützen.***

*Mit freundlichen Grüßen*



Prof. Dr. med. Christoph Heesen



Nicole Krause



## Datenschutzerklärung

Die erhobenen Daten unterliegen der Schweigepflicht und den datenschutzgesetzlichen Bestimmungen. Die Daten werden ausschließlich für wissenschaftliche Zwecke verwendet. Zugriff auf diese Daten haben die Projektleiter/Innen. Die Datenauswertung erfolgt durch Prof. Dr. Heesen und seine explizit autorisierten Mitarbeiter ohne Bezug zu den persönlichen Daten der Studienteilnehmer. Die in den Studien erhobenen Daten werden in pseudonymisierter<sup>1</sup> Form ausgewertet und für die Dauer von 10 Jahren gespeichert. Bei der Pseudonymisierung wird dem richtigen Namen ein Pseudonym (also ein Nummern- und Buchstabencode, z.B. A01, B01) zugeordnet. In den Dokumenten wird nur auf das Pseudonym und nicht auf den Namen verwiesen, sodass personenbezogene Daten nicht oder nur durch einen unverhältnismäßig großen Aufwand einer bestimmten Person zugeordnet werden können. Die personenbezogenen Daten sind gegen unbefugten Zugriff gesichert. Nach Beendigung der Studie werden die Tonaufnahmen der Interviews vernichtet. Ein individueller Widerruf der Erlaubnis zur Verwendung Ihrer Daten ist jederzeit möglich.

Eine Weitergabe der erhobenen Daten im Rahmen der Studie erfolgt nur in anonymisierter<sup>2</sup> Form. Die beteiligten Personen sind zur Verschwiegenheit verpflichtet. Gleiches gilt für die Veröffentlichung der Studienergebnisse.

Die Studienteilnehmer/innen haben das Recht, über die von Ihnen erhobenen personenbezogenen Daten Auskunft zu verlangen und über möglicherweise anfallende personenbezogene Ergebnisse der Studie ggf. informiert zu werden.

Diese Studie ist auch durch die zuständige Ethik-Kommission der Ärztekammer Hamburg beraten worden. Der zuständigen Landesbehörde kann ggf. Einsichtnahme in die Studienunterlagen gewährt werden. Im Falle des Widerrufs Ihrer Einwilligungserklärung werden die bereits erhobenen anonymisierter<sup>2</sup> und in dieser Form weiter genutzt.

---

<sup>1</sup> Pseudonymisieren ist das Ersetzen des Namens und anderer Identifikationsmerkmale durch ein Kennzeichen zu dem Zweck, die Identifizierung des Betroffenen auszuschließen oder wesentlich zu erschweren (§ 3 Abs. 6a Bundesdatenschutzgesetz).

<sup>2</sup> Anonymisieren ist das Verändern personenbezogener Daten derart, dass die Einzelangaben über persönliche oder sachliche Verhältnisse nicht mehr oder nur mit einem unverhältnismäßig großen Aufwand an Zeit, Kosten und Arbeitskraft einer bestimmten oder bestimmaren natürlichen Person zugeordnet werden können (§ 3 Abs. 6 Bundesdatenschutzgesetz).

## **Ergänzende Information für Studienteilnehmer gemäß Europäischer Datenschutz-Grundverordnung<sup>3</sup>:**

**Hiermit informieren wir Sie über die in der DSGVO festgelegten Rechte** (Artikel 12 ff. DSGVO):

**Rechtsgrundlage:** Die Rechtsgrundlage zur Verarbeitung der Sie betreffenden personenbezogenen Daten bildet bei klinischen Studien Ihre freiwillige schriftliche Einwilligung gemäß DSGVO sowie der Deklaration von Helsinki (Erklärung des Weltärztebundes zu den ethischen Grundsätzen für die medizinische Forschung am Menschen) und der Leitlinie für Gute Klinische Praxis. Zeitgleich mit der DSGVO tritt in Deutschland das überarbeitete Bundesdatenschutzgesetz (BDSG-neu) in Kraft.

**Für die Datenverarbeitung verantwortliche Person:** Der Studienleiter des Universitätsklinikums Hamburg-Eppendorf: **Prof. Dr. Christoph Heesen**

**Recht auf Auskunft:** Sie haben das Recht auf Auskunft über die Sie betreffenden personenbezogenen Daten, die im Rahmen der klinischen Studie erhoben, verarbeitet oder ggf. an Dritte übermittelt werden (Aushändigen einer kostenfreien Kopie) (Artikel 15 DSGVO, §34 BDSG-neu).

**Recht auf Berichtigung:** Sie haben das Recht, Sie betreffende unrichtige personenbezogene Daten berichtigen zu lassen (Artikel 16 und 19 DSGVO).

**Recht auf Löschung:** Sie haben das Recht auf Löschung Sie betreffender personenbezogener Daten, z. B. wenn diese Daten für den Zweck, für den sie erhoben wurden, nicht mehr notwendig sind (Artikel 17 und 19 DSGVO, §35 BDSG-neu).

**Recht auf Einschränkung der Verarbeitung:** Unter bestimmten Voraussetzungen haben Sie das Recht, eine Einschränkung der Verarbeitung zu verlangen, d.h. die Daten dürfen nur gespeichert, aber nicht verarbeitet werden. Dies müssen Sie beantragen. Wenden Sie sich hierzu bitte an Ihren Studienleiter oder an den Datenschutzbeauftragten des Prüfzentrums (Artikel 18 und 19 DSGVO).

**Recht auf Datenübertragbarkeit:** Sie haben das Recht, die Sie betreffenden personenbezogenen Daten, die Sie dem Verantwortlichen für die klinische Studie bereitgestellt haben, zu erhalten. Damit können Sie beantragen, dass diese Daten entweder Ihnen oder, soweit technisch möglich, einer anderen von Ihnen benannten Stelle übermittelt werden (Artikel 20 DSGVO).

**Widerspruchsrecht:** Sie haben das Recht, jederzeit gegen konkrete Entscheidungen oder Maßnahmen zur Verarbeitung der Sie betreffenden personenbezogenen Daten Widerspruch einzulegen (Art 21 DSGVO, § 36BDSG-neu). Eine solche Verarbeitung findet anschließend grundsätzlich nicht mehr statt.

**Einwilligung zur Verarbeitung personenbezogener Daten und Recht auf Widerruf dieser Einwilligung:** Die Verarbeitung Ihrer personenbezogenen Daten ist nur mit Ihrer Einwilligung rechtmäßig (Artikel 6 DSGVO). Sie haben das Recht, Ihre Einwilligung zur Verarbeitung personenbezogener Daten jederzeit zu widerrufen. Im Falle des Widerrufs müssen Ihre personenbezogenen Daten grundsätzlich gelöscht werden (Artikel 7, Absatz 3 DSGVO). Es gibt allerdings Ausnahmen, nach denen die bis zum Zeitpunkt des Widerrufs erhobenen Daten

---

<sup>3</sup> Verordnung (EU) 2016/679 des Europäischen Parlaments und des Rates vom 27. April 2016 zum Schutz natürlicher Personen bei der Verarbeitung personenbezogener Daten, zum freien Datenverkehr und zur Aufhebung der Richtlinie 95/46/EG (Datenschutz-Grundverordnung)

weiter verarbeitet werden dürfen, z.B. wenn die weitere Datenverarbeitung zur Erfüllung einer rechtlichen Verpflichtung erforderlich ist (Art. 17 Abs. 3 b DSGVO).

**Möchten Sie eines dieser Rechte in Anspruch nehmen, wenden Sie sich bitte an den Studienleiter Ihres Prüfzentrums.**

Außerdem haben Sie das **Recht, Beschwerde bei einer Aufsichtsbehörde/n einzulegen**, wenn Sie der Ansicht sind, dass die Verarbeitung der Sie betreffenden personenbezogenen Daten gegen die DSGVO verstößt. Wenn Sie Bedenken hinsichtlich des Umgangs mit Ihren personenbezogenen Daten haben, können Sie sich an die für Sie zuständige Datenschutzbehörde wenden:

**Die für das UKE beauftragte Behörde**

Datenschutzbeauftragter des  
Universitätsklinikums Hamburg-Eppendorf

Matthias Jaster

Martinstraße 52  
20246 Hamburg  
040 / 7410 - 56890

m.jaster@uke.de

**Datenschutz-Aufsichtsbehörde**

Hamburgische Beauftragte für  
Datenschutz und Informationsfreiheit

Ludwig-Erhard-Str. 22  
20459 Hamburg  
040 / 42854 - 4040

mailbox@datenschutz.hamburg.de

## Einwilligungserklärung zur Teilnahme an der Studie POWER@MS1

Teilnehmer, Teilnehmerin (Name in Druckbuchstaben):

.....

### **Bitte ankreuzen und unterschreiben**

Hiermit willige ich zur freiwilligen Teilnahme an der Studie ein.

Ich wurde mündlich ausführlich und verständlich über das Anliegen, die Bedeutung und die Tragweite der Studie aufgeklärt. Das Informationsschreiben zur Studie und zum Umgang mit den erfassten Daten habe ich gelesen und verstanden. Meine Fragen zur Studie wurden erläutert und beantwortet.

Zur Einwilligung hatte ich ausreichend Zeit. Meine Teilnahme ist freiwillig und kann jederzeit ohne Angaben von Gründen widerrufen werden, ohne dass für mich Nachteile entstehen. Ich habe keinerlei Kosten oder finanziellen Nutzen durch die Teilnahme an dieser Studie. Es gelten die Richtlinien des Datenschutzes.

Eine Kopie der Einwilligungserklärung habe ich erhalten und erkläre hiermit meine freiwillige Teilnahme an dieser Studie.

Ort, Datum

Unterschrift des Teilnehmers / der Teilnehmerin

.....

.....

Ort, Datum

Unterschrift des Arztes

.....

.....



SPIRIT 2013 Checklist: Recommended items to address in a clinical trial protocol and related documents\*

| Section/item                      | Item No | Description                                                                                                                                                                                                                                                                              | Addressed on page number |
|-----------------------------------|---------|------------------------------------------------------------------------------------------------------------------------------------------------------------------------------------------------------------------------------------------------------------------------------------------|--------------------------|
| <b>Administrative information</b> |         |                                                                                                                                                                                                                                                                                          |                          |
| Title                             | 1       | Descriptive title identifying the study design, population, interventions, and, if applicable, trial acronym                                                                                                                                                                             | <u>1</u>                 |
| Trial registration                | 2a      | Trial identifier and registry name. If not yet registered, name of intended registry                                                                                                                                                                                                     | <u>2</u>                 |
|                                   | 2b      | All items from the World Health Organization Trial Registration Data Set                                                                                                                                                                                                                 | <u>N/A</u>               |
| Protocol version                  | 3       | Date and version identifier                                                                                                                                                                                                                                                              | <u>1</u>                 |
| Funding                           | 4       | Sources and types of financial, material, and other support                                                                                                                                                                                                                              | <u>12</u>                |
| Roles and responsibilities        | 5a      | Names, affiliations, and roles of protocol contributors                                                                                                                                                                                                                                  | <u>1</u>                 |
|                                   | 5b      | Name and contact information for the trial sponsor                                                                                                                                                                                                                                       | <u>12</u>                |
|                                   | 5c      | Role of study sponsor and funders, if any, in study design; collection, management, analysis, and interpretation of data; writing of the report; and the decision to submit the report for publication, including whether they will have ultimate authority over any of these activities | <u>12</u>                |
|                                   | 5d      | Composition, roles, and responsibilities of the coordinating centre, steering committee, endpoint adjudication committee, data management team, and other individuals or groups overseeing the trial, if applicable (see Item 21a for data monitoring committee)                         | <u>11</u>                |

|    |                                                           |     |                                                                                                               |            |
|----|-----------------------------------------------------------|-----|---------------------------------------------------------------------------------------------------------------|------------|
| 1  | <b>Introduction</b>                                       |     |                                                                                                               |            |
| 2  |                                                           |     |                                                                                                               |            |
| 3  | Background and                                            | 6a  | Description of research question and justification for undertaking the trial, including summary of relevant   | <u>2-3</u> |
| 4  | rationale                                                 |     | studies (published and unpublished) examining benefits and harms for each intervention                        |            |
| 5  |                                                           |     |                                                                                                               |            |
| 6  |                                                           | 6b  | Explanation for choice of comparators                                                                         | <u>6</u>   |
| 7  |                                                           |     |                                                                                                               |            |
| 8  | Objectives                                                | 7   | Specific objectives or hypotheses                                                                             | <u>3</u>   |
| 9  |                                                           |     |                                                                                                               |            |
| 10 | Trial design                                              | 8   | Description of trial design including type of trial (eg, parallel group, crossover, factorial, single group), |            |
| 11 |                                                           |     | allocation ratio, and framework (eg, superiority, equivalence, noninferiority, exploratory)                   | <u>3-4</u> |
| 12 |                                                           |     |                                                                                                               |            |
| 13 |                                                           |     |                                                                                                               |            |
| 14 | <b>Methods: Participants, interventions, and outcomes</b> |     |                                                                                                               |            |
| 15 |                                                           |     |                                                                                                               |            |
| 16 | Study setting                                             | 9   | Description of study settings (eg, community clinic, academic hospital) and list of countries where data will | <u>4</u>   |
| 17 |                                                           |     | be collected. Reference to where list of study sites can be obtained                                          |            |
| 18 |                                                           |     |                                                                                                               |            |
| 19 | Eligibility criteria                                      | 10  | Inclusion and exclusion criteria for participants. If applicable, eligibility criteria for study centres and  | <u>4</u>   |
| 20 |                                                           |     | individuals who will perform the interventions (eg, surgeons, psychotherapists)                               |            |
| 21 |                                                           |     |                                                                                                               |            |
| 22 | Interventions                                             | 11a | Interventions for each group with sufficient detail to allow replication, including how and when they will be | <u>4-6</u> |
| 23 |                                                           |     | administered                                                                                                  |            |
| 24 |                                                           |     |                                                                                                               |            |
| 25 |                                                           | 11b | Criteria for discontinuing or modifying allocated interventions for a given trial participant (eg, drug dose  | <u>6</u>   |
| 26 |                                                           |     | change in response to harms, participant request, or improving/worsening disease)                             |            |
| 27 |                                                           |     |                                                                                                               |            |
| 28 |                                                           | 11c | Strategies to improve adherence to intervention protocols, and any procedures for monitoring adherence        | <u>5</u>   |
| 29 |                                                           |     | (eg, drug tablet return, laboratory tests)                                                                    |            |
| 30 |                                                           |     |                                                                                                               |            |
| 31 |                                                           | 11d | Relevant concomitant care and interventions that are permitted or prohibited during the trial                 | <u>6</u>   |
| 32 |                                                           |     |                                                                                                               |            |
| 33 | Outcomes                                                  | 12  | Primary, secondary, and other outcomes, including the specific measurement variable (eg, systolic blood       | <u>6-9</u> |
| 34 |                                                           |     | pressure), analysis metric (eg, change from baseline, final value, time to event), method of aggregation (eg, |            |
| 35 |                                                           |     | median, proportion), and time point for each outcome. Explanation of the clinical relevance of chosen         |            |
| 36 |                                                           |     | efficacy and harm outcomes is strongly recommended                                                            |            |
| 37 |                                                           |     |                                                                                                               |            |
| 38 | Participant timeline                                      | 13  | Time schedule of enrolment, interventions (including any run-ins and washouts), assessments, and visits for   | <u>9</u>   |
| 39 |                                                           |     | participants. A schematic diagram is highly recommended (see Figure)                                          |            |
| 40 |                                                           |     |                                                                                                               |            |
| 41 |                                                           |     |                                                                                                               |            |
| 42 |                                                           |     |                                                                                                               |            |
| 43 |                                                           |     |                                                                                                               |            |
| 44 |                                                           |     |                                                                                                               |            |
| 45 |                                                           |     |                                                                                                               |            |
| 46 |                                                           |     |                                                                                                               |            |

|   |             |    |                                                                                                                                                                                       |          |
|---|-------------|----|---------------------------------------------------------------------------------------------------------------------------------------------------------------------------------------|----------|
| 1 | Sample size | 14 | Estimated number of participants needed to achieve study objectives and how it was determined, including clinical and statistical assumptions supporting any sample size calculations | <u>9</u> |
| 2 |             |    |                                                                                                                                                                                       |          |
| 3 |             |    |                                                                                                                                                                                       |          |
| 4 | Recruitment | 15 | Strategies for achieving adequate participant enrolment to reach target sample size                                                                                                   | <u>9</u> |
| 5 |             |    |                                                                                                                                                                                       |          |

### 6 **Methods: Assignment of interventions (for controlled trials)**

#### 7 Allocation:

|    |                                  |     |                                                                                                                                                                                                                                                                                                                                                          |            |
|----|----------------------------------|-----|----------------------------------------------------------------------------------------------------------------------------------------------------------------------------------------------------------------------------------------------------------------------------------------------------------------------------------------------------------|------------|
| 8  |                                  |     |                                                                                                                                                                                                                                                                                                                                                          |            |
| 9  |                                  |     |                                                                                                                                                                                                                                                                                                                                                          |            |
| 10 | Sequence generation              | 16a | Method of generating the allocation sequence (eg, computer-generated random numbers), and list of any factors for stratification. To reduce predictability of a random sequence, details of any planned restriction (eg, blocking) should be provided in a separate document that is unavailable to those who enrol participants or assign interventions | <u>9</u>   |
| 11 |                                  |     |                                                                                                                                                                                                                                                                                                                                                          |            |
| 12 |                                  |     |                                                                                                                                                                                                                                                                                                                                                          |            |
| 13 |                                  |     |                                                                                                                                                                                                                                                                                                                                                          |            |
| 14 |                                  |     |                                                                                                                                                                                                                                                                                                                                                          |            |
| 15 |                                  |     |                                                                                                                                                                                                                                                                                                                                                          |            |
| 16 | Allocation concealment mechanism | 16b | Mechanism of implementing the allocation sequence (eg, central telephone; sequentially numbered, opaque, sealed envelopes), describing any steps to conceal the sequence until interventions are assigned                                                                                                                                                | <u>9</u>   |
| 17 |                                  |     |                                                                                                                                                                                                                                                                                                                                                          |            |
| 18 |                                  |     |                                                                                                                                                                                                                                                                                                                                                          |            |
| 19 |                                  |     |                                                                                                                                                                                                                                                                                                                                                          |            |
| 20 | Implementation                   | 16c | Who will generate the allocation sequence, who will enrol participants, and who will assign participants to interventions                                                                                                                                                                                                                                | <u>9</u>   |
| 21 |                                  |     |                                                                                                                                                                                                                                                                                                                                                          |            |
| 22 |                                  |     |                                                                                                                                                                                                                                                                                                                                                          |            |
| 23 |                                  |     |                                                                                                                                                                                                                                                                                                                                                          |            |
| 24 | Blinding (masking)               | 17a | Who will be blinded after assignment to interventions (eg, trial participants, care providers, outcome assessors, data analysts), and how                                                                                                                                                                                                                | <u>9</u>   |
| 25 |                                  |     |                                                                                                                                                                                                                                                                                                                                                          |            |
| 26 |                                  |     |                                                                                                                                                                                                                                                                                                                                                          |            |
| 27 |                                  | 17b | If blinded, circumstances under which unblinding is permissible, and procedure for revealing a participant's allocated intervention during the trial                                                                                                                                                                                                     | <u>N/A</u> |
| 28 |                                  |     |                                                                                                                                                                                                                                                                                                                                                          |            |
| 29 |                                  |     |                                                                                                                                                                                                                                                                                                                                                          |            |
| 30 |                                  |     |                                                                                                                                                                                                                                                                                                                                                          |            |

### 31 **Methods: Data collection, management, and analysis**

|    |                         |     |                                                                                                                                                                                                                                                                                                                                                                                                              |           |
|----|-------------------------|-----|--------------------------------------------------------------------------------------------------------------------------------------------------------------------------------------------------------------------------------------------------------------------------------------------------------------------------------------------------------------------------------------------------------------|-----------|
| 32 |                         |     |                                                                                                                                                                                                                                                                                                                                                                                                              |           |
| 33 | Data collection methods | 18a | Plans for assessment and collection of outcome, baseline, and other trial data, including any related processes to promote data quality (eg, duplicate measurements, training of assessors) and a description of study instruments (eg, questionnaires, laboratory tests) along with their reliability and validity, if known. Reference to where data collection forms can be found, if not in the protocol | <u>10</u> |
| 34 |                         |     |                                                                                                                                                                                                                                                                                                                                                                                                              |           |
| 35 |                         |     |                                                                                                                                                                                                                                                                                                                                                                                                              |           |
| 36 |                         |     |                                                                                                                                                                                                                                                                                                                                                                                                              |           |
| 37 |                         |     |                                                                                                                                                                                                                                                                                                                                                                                                              |           |
| 38 |                         |     |                                                                                                                                                                                                                                                                                                                                                                                                              |           |
| 39 |                         | 18b | Plans to promote participant retention and complete follow-up, including list of any outcome data to be collected for participants who discontinue or deviate from intervention protocols                                                                                                                                                                                                                    | <u>10</u> |
| 40 |                         |     |                                                                                                                                                                                                                                                                                                                                                                                                              |           |
| 41 |                         |     |                                                                                                                                                                                                                                                                                                                                                                                                              |           |
| 42 |                         |     |                                                                                                                                                                                                                                                                                                                                                                                                              |           |

|    |                                 |     |                                                                                                                                                                                                                                                                                                                                       |                  |
|----|---------------------------------|-----|---------------------------------------------------------------------------------------------------------------------------------------------------------------------------------------------------------------------------------------------------------------------------------------------------------------------------------------|------------------|
| 1  | Data management                 | 19  | Plans for data entry, coding, security, and storage, including any related processes to promote data quality (eg, double data entry; range checks for data values). Reference to where details of data management procedures can be found, if not in the protocol                                                                     | <u>10</u>        |
| 2  |                                 |     |                                                                                                                                                                                                                                                                                                                                       |                  |
| 3  |                                 |     |                                                                                                                                                                                                                                                                                                                                       |                  |
| 4  |                                 |     |                                                                                                                                                                                                                                                                                                                                       |                  |
| 5  | Statistical methods             | 20a | Statistical methods for analysing primary and secondary outcomes. Reference to where other details of the statistical analysis plan can be found, if not in the protocol                                                                                                                                                              | <u>10-11</u>     |
| 6  |                                 |     |                                                                                                                                                                                                                                                                                                                                       |                  |
| 7  |                                 |     |                                                                                                                                                                                                                                                                                                                                       |                  |
| 8  |                                 | 20b | Methods for any additional analyses (eg, subgroup and adjusted analyses)                                                                                                                                                                                                                                                              | <u>10</u>        |
| 9  |                                 |     |                                                                                                                                                                                                                                                                                                                                       |                  |
| 10 |                                 | 20c | Definition of analysis population relating to protocol non-adherence (eg, as randomised analysis), and any statistical methods to handle missing data (eg, multiple imputation)                                                                                                                                                       | <u>10-11</u>     |
| 11 |                                 |     |                                                                                                                                                                                                                                                                                                                                       |                  |
| 12 |                                 |     |                                                                                                                                                                                                                                                                                                                                       |                  |
| 13 |                                 |     |                                                                                                                                                                                                                                                                                                                                       |                  |
| 14 | <b>Methods: Monitoring</b>      |     |                                                                                                                                                                                                                                                                                                                                       |                  |
| 15 |                                 |     |                                                                                                                                                                                                                                                                                                                                       |                  |
| 16 | Data monitoring                 | 21a | Composition of data monitoring committee (DMC); summary of its role and reporting structure; statement of whether it is independent from the sponsor and competing interests; and reference to where further details about its charter can be found, if not in the protocol. Alternatively, an explanation of why a DMC is not needed | <u>11</u>        |
| 17 |                                 |     |                                                                                                                                                                                                                                                                                                                                       |                  |
| 18 |                                 |     |                                                                                                                                                                                                                                                                                                                                       |                  |
| 19 |                                 |     |                                                                                                                                                                                                                                                                                                                                       |                  |
| 20 |                                 |     |                                                                                                                                                                                                                                                                                                                                       |                  |
| 21 |                                 |     |                                                                                                                                                                                                                                                                                                                                       |                  |
| 22 |                                 | 21b | Description of any interim analyses and stopping guidelines, including who will have access to these interim results and make the final decision to terminate the trial                                                                                                                                                               | <u>11</u>        |
| 23 |                                 |     |                                                                                                                                                                                                                                                                                                                                       |                  |
| 24 |                                 |     |                                                                                                                                                                                                                                                                                                                                       |                  |
| 25 | Harms                           | 22  | Plans for collecting, assessing, reporting, and managing solicited and spontaneously reported adverse events and other unintended effects of trial interventions or trial conduct                                                                                                                                                     | <u>11</u>        |
| 26 |                                 |     |                                                                                                                                                                                                                                                                                                                                       |                  |
| 27 |                                 |     |                                                                                                                                                                                                                                                                                                                                       |                  |
| 28 | Auditing                        | 23  | Frequency and procedures for auditing trial conduct, if any, and whether the process will be independent from investigators and the sponsor                                                                                                                                                                                           | <u>11</u>        |
| 29 |                                 |     |                                                                                                                                                                                                                                                                                                                                       |                  |
| 30 |                                 |     |                                                                                                                                                                                                                                                                                                                                       |                  |
| 31 |                                 |     |                                                                                                                                                                                                                                                                                                                                       |                  |
| 32 | <b>Ethics and dissemination</b> |     |                                                                                                                                                                                                                                                                                                                                       |                  |
| 33 |                                 |     |                                                                                                                                                                                                                                                                                                                                       |                  |
| 34 | Research ethics approval        | 24  | Plans for seeking research ethics committee/institutional review board (REC/IRB) approval                                                                                                                                                                                                                                             | <u>2, 11, 12</u> |
| 35 |                                 |     |                                                                                                                                                                                                                                                                                                                                       |                  |
| 36 |                                 |     |                                                                                                                                                                                                                                                                                                                                       |                  |
| 37 | Protocol amendments             | 25  | Plans for communicating important protocol modifications (eg, changes to eligibility criteria, outcomes, analyses) to relevant parties (eg, investigators, REC/IRBs, trial participants, trial registries, journals, regulators)                                                                                                      | <u>12</u>        |
| 38 |                                 |     |                                                                                                                                                                                                                                                                                                                                       |                  |
| 39 |                                 |     |                                                                                                                                                                                                                                                                                                                                       |                  |
| 40 |                                 |     |                                                                                                                                                                                                                                                                                                                                       |                  |
| 41 |                                 |     |                                                                                                                                                                                                                                                                                                                                       |                  |
| 42 |                                 |     |                                                                                                                                                                                                                                                                                                                                       |                  |



|    |                               |     |                                                                                                                                                                                                                                                                                     |                                |
|----|-------------------------------|-----|-------------------------------------------------------------------------------------------------------------------------------------------------------------------------------------------------------------------------------------------------------------------------------------|--------------------------------|
| 1  | Consent or assent             | 26a | Who will obtain informed consent or assent from potential trial participants or authorised surrogates, and how (see Item 32)                                                                                                                                                        | <u>11</u>                      |
| 2  |                               |     |                                                                                                                                                                                                                                                                                     |                                |
| 3  |                               |     |                                                                                                                                                                                                                                                                                     |                                |
| 4  |                               | 26b | Additional consent provisions for collection and use of participant data and biological specimens in ancillary studies, if applicable                                                                                                                                               | <u>N/A</u>                     |
| 5  |                               |     |                                                                                                                                                                                                                                                                                     |                                |
| 6  |                               |     |                                                                                                                                                                                                                                                                                     |                                |
| 7  | Confidentiality               | 27  | How personal information about potential and enrolled participants will be collected, shared, and maintained in order to protect confidentiality before, during, and after the trial                                                                                                | <u>10, 11</u>                  |
| 8  |                               |     |                                                                                                                                                                                                                                                                                     |                                |
| 9  |                               |     |                                                                                                                                                                                                                                                                                     |                                |
| 10 | Declaration of interests      | 28  | Financial and other competing interests for principal investigators for the overall trial and each study site                                                                                                                                                                       | <u>12</u>                      |
| 11 |                               |     |                                                                                                                                                                                                                                                                                     |                                |
| 12 |                               |     |                                                                                                                                                                                                                                                                                     |                                |
| 13 | Access to data                | 29  | Statement of who will have access to the final trial dataset, and disclosure of contractual agreements that limit such access for investigators                                                                                                                                     | <u>11</u>                      |
| 14 |                               |     |                                                                                                                                                                                                                                                                                     |                                |
| 15 |                               |     |                                                                                                                                                                                                                                                                                     |                                |
| 16 | Ancillary and post-trial care | 30  | Provisions, if any, for ancillary and post-trial care, and for compensation to those who suffer harm from trial participation                                                                                                                                                       | <u>N/A</u>                     |
| 17 |                               |     |                                                                                                                                                                                                                                                                                     |                                |
| 18 |                               |     |                                                                                                                                                                                                                                                                                     |                                |
| 19 |                               |     |                                                                                                                                                                                                                                                                                     |                                |
| 20 | Dissemination policy          | 31a | Plans for investigators and sponsor to communicate trial results to participants, healthcare professionals, the public, and other relevant groups (eg, via publication, reporting in results databases, or other data sharing arrangements), including any publication restrictions | <u>2, 11</u>                   |
| 21 |                               |     |                                                                                                                                                                                                                                                                                     |                                |
| 22 |                               |     |                                                                                                                                                                                                                                                                                     |                                |
| 23 |                               |     |                                                                                                                                                                                                                                                                                     |                                |
| 24 |                               | 31b | Authorship eligibility guidelines and any intended use of professional writers                                                                                                                                                                                                      | <u>11</u>                      |
| 25 |                               |     |                                                                                                                                                                                                                                                                                     |                                |
| 26 |                               | 31c | Plans, if any, for granting public access to the full protocol, participant-level dataset, and statistical code                                                                                                                                                                     | <u>11</u>                      |
| 27 |                               |     |                                                                                                                                                                                                                                                                                     |                                |
| 28 |                               |     |                                                                                                                                                                                                                                                                                     |                                |
| 29 | <b>Appendices</b>             |     |                                                                                                                                                                                                                                                                                     |                                |
| 30 |                               |     |                                                                                                                                                                                                                                                                                     |                                |
| 31 | Informed consent materials    | 32  | Model consent form and other related documentation given to participants and authorised surrogates                                                                                                                                                                                  | <u>Appendix II<sup>o</sup></u> |
| 32 |                               |     |                                                                                                                                                                                                                                                                                     |                                |
| 33 |                               |     |                                                                                                                                                                                                                                                                                     |                                |
| 34 | Biological specimens          | 33  | Plans for collection, laboratory evaluation, and storage of biological specimens for genetic or molecular analysis in the current trial and for future use in ancillary studies, if applicable                                                                                      | <u>N/A</u>                     |
| 35 |                               |     |                                                                                                                                                                                                                                                                                     |                                |
| 36 |                               |     |                                                                                                                                                                                                                                                                                     |                                |

\*It is strongly recommended that this checklist be read in conjunction with the SPIRIT 2013 Explanation & Elaboration for important clarification on the items. Amendments to the protocol should be tracked and dated. The SPIRIT checklist is copyrighted by the SPIRIT Group under the Creative Commons "[Attribution-NonCommercial-NoDerivs 3.0 Unported](https://creativecommons.org/licenses/by-nc-nd/3.0/)" license.

<sup>o</sup>Available in German.
