# Supplementary material for: Study protocol for a randomised controlled trial of a web-based behavioural lifestyle programme for emPOWERment in early Multiple Sclerosis (POWER@MS1)
Source: PubMed Central journal article supplement — BMJ Open. 2021 Feb 16;11(2):e041720. doi: 10.1136/bmjopen-2020-041720 (PMC7888332; doi:10.1136/bmjopen-2020-041720), 2021-02-16
Supplement: bmjopen-2020-041720supp002.pdf [file bmjopen-2020-041720supp002.pdf]

## Appendix II: Model consent form

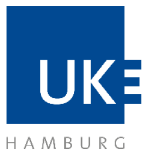

Klinik und Poliklinik für Neurologie  
Institut für Neuroimmunologie und Multiple Sklerose (INIMS)

Universitätsklinikum Hamburg-Eppendorf | Martinistraße 52 | 20246 Hamburg  
Klinik und Poliklinik für Neurologie | Institut für Neuroimmunologie und Multiple Sklerose (INIMS)

Prof. Dr. Christoph Heesen  
Leiter MS-Tagesklinik

Martinistraße 52  
20246 Hamburg

MS-Tagesklinik  
Gebäude W34  
Telefon: +49 (0) 40 7410-54076  
Fax: +49 (0) 40 7410-56973  
multiplesklerose@uke.de  
www.inims.de  
www.uke.de

### Patienteninformation zur Studie „POWER@MS1“ – RCT (Version 1.3)

**Ansprechpartnerinnen: Nicole Krause, Tanja Steffen**  
Kontakt: [powerms1@uke.de](mailto:powerms1@uke.de)

Hamburg, 15.06.2020  
Seite 1/8

### Information und Einwilligung zur Studie:

#### Interaktive Webplattform zum EmPOWERment bei früher Multipler Sklerose (POWER@MS1) – Randomisiert kontrollierte Studie (RCT)

Sehr geehrte Studieninteressent\*innen,

das Institut für Neuroimmunologie und Multiple Sklerose sowie der Bundesverband der Selbsthilfe (DMSG) danken Ihnen für Ihr Interesse an unserer Studie zum webbasierten Empowerment für Menschen mit Multipler Sklerose (MS). Die Studie wird öffentlich durch den Innovationsfond beim gemeinsamen Bundesausschuss (G-BA) gefördert.

Bitte lesen Sie diese Studieninformation sorgfältig durch. Ihre Ärztin oder ihr Arzt wird mit Ihnen auch direkt über die Studie sprechen. Bitte fragen Sie diesen oder diese oder kontaktieren Sie den unten genannten Studienleiter Prof. Dr. med. Christoph Heesen oder die Studienkoordinatorinnen Nicole Krause und Tanja Steffen, wenn Sie etwas nicht verstehen oder wenn Sie zusätzlich etwas wissen möchten.

#### Was ist das Ziel dieser Studie?

Bei Ihnen ist kürzlich ein MS Verdacht geäußert oder auch eine MS Diagnose gestellt worden. Diese Diagnose stellt für viele Patienten eine erhebliche Verunsicherung dar. Fragen die viele umtreiben sind zum Beispiel:

Wie sicher ist die Diagnose?

Werde ich einen eher gutartigen oder aktiveren Verlauf haben?

Brauche ich eine ganz frühe Immuntherapie?

Was kann ich tun, außer Medikamente zu nehmen?

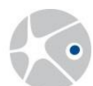

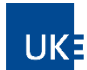

Diese Fragen können im Rahmen von Arztbesuchen, beim Neurologen, nur begrenzt diskutiert werden. Im Internet gibt es eine Fülle von Informationen, deren Qualität oft zweifelhaft ist. Um Sie im ersten Jahr Ihrer MS Diagnose zu begleiten, haben wir verschiedene Materialien entwickelt, die Sie darin unterstützen sollen, einen eigenen Weg mit der Erkrankung zu finden.

Das Ziel dieser Studie ist es zu klären, ob diese von uns entwickelten und über das Internet bereit gestellten Materialien hilfreich sind. Im Verlauf von bis zu 2 Jahren wird insbesondere die Aktivität der MS im MRT (=Magnetresonanztomografie), mit Untersuchungen alle 6 Monate, sehr genau untersucht werden. Darüber hinaus erhalten Sie mehrmals Fragebögen zu möglichen Beeinträchtigungen, zu Ihrer Stimmungslage, aber auch zu Lebensstilfaktoren wie Ihrer sportlichen Aktivität und Ihren Ernährungsgewohnheiten.

### **Auf was müssen Sie sich als Teilnehmer/in einstellen?**

In der Studie werden, in zwei Gruppen, unterschiedliche Informationsstrategien zu Lebensstilfaktoren verglichen. Die Zuordnung zu einer der Gruppen erfolgt zufällig (randomisiert). Wenn Sie sich für die Teilnahme entscheiden, erhalten Sie einen Zugangscode (Login) für eine Internetseite mit Informationen und Schulungsmaterialien. Dort melden Sie sich mit einer E-Mail-Adresse und einem selbst gewählten Passwort an. Die Webseite wird Ihnen über einen neutralen E-Mailabsender (ohne Bezug zur MS), in zeitlichen Abständen, immer wieder Informationen und Erinnerungen schicken. Auch per SMS können Sie auf eigenen Wunsch angesprochen werden. In diese Kontaktaufnahmen müssen Sie einwilligen. Dabei müssen Sie bedenken, dass jegliche Kommunikation über das Internet möglicherweise von Unbefugten abgehört werden kann und ein nicht sicher kalkulierbares Risiko besteht, dass bei der Nutzung von Internetplattformen Dritte an die eingegebenen Informationen gelangen können. Die Wahrscheinlichkeit, dass Ihnen damit jemand schadet ist jedoch sehr gering.

Wenn Sie innerhalb von 3 Monaten vor Studienbeginn ein geeignetes MRT bekommen haben, kann dieses für die Studie genutzt werden. Sollte kein geeignetes MRT vorliegen, erfolgt ein MRT zu Studienbeginn und nach 3, 6 und 12 Monaten. Für einen Teil der Patienten, die sehr früh eingeschlossen werden, erfolgen weitere MRTs zu Monat 18 und 24. Hier sollten die Aufnahmen bestenfalls immer am gleichen Gerät, in der gleichen Praxis erfolgen. Eine Kopie der Bilder wird an die Studienzentrale in Hamburg gesendet werden. Aufgrund der Anzahl an studienbedingten MRT-Untersuchungen entsteht durch die Teilnahme an der POWER@MS1 Studie ein zusätzlicher Zeitaufwand für Sie. Da das Verwenden von Kontrastmittel im Rahmen der Studie nicht notwendig ist, bestehen für Sie aber keine Risiken aufgrund der zusätzlichen MRT-Untersuchungen.

Zu Beginn der Studie und nach 12 Monaten erfolgt eine umfangreichere Erhebung mit Fragebogenmaterialien, aber auch im Verlauf der Studie (maximal 2 Jahre) benötigen wir Ihre Mitarbeit in Form der Bearbeitung von Fragebogenmaterial. Dies stellen wir entweder in Papierform mit Rücksendeumschlag zur Verfügung oder über ein persönliches Login im Internet für die gesicherte Forschungsdatenbank des MS-Registers der Deutschen Multiple Sklerose Gesellschaft (DSMG, Bundesverband e.V.), welche zur elektronischen Abbildung dieser Studie genutzt wird. Die Forschungsdatenbank wird von der MS Forschungs- und ProjektentwicklungsgmbH in Hannover, einer 100%igen Tochter der DMS-Stiftung der DSMG, auf Servern in Deutschland betrieben. Das Ernährungsverhalten untersuchen wir mit zwei internetbasierten Erhebungsinstrumenten. Eines dieser Instrumente wird über eine gesicherte Online-Platt-



form des Humanstudienzentrums des Deutschen Instituts für Ernährungsforschung (DIfE) verwaltet. Das zweite Instrument wird von der Dietary Assessment Ltd (ein Spin-Out-Unternehmen der Universität Leeds) verwaltet, welche die erhaltenen Daten auf einem Server in den Niederlanden, mit einem Backup in England speichert. Beide Einrichtungen handeln in Übereinstimmung mit der Datenschutz-Grundverordnung (DSGVO) der EU und verarbeiten die Daten in pseudonymisierter Form (das heißt mit einem Code, ohne direkte Verbindung zu Ihrem Namen). Die Links zu den Ernährungserhebungen werden Ihnen über die Studien-E-Mail (powerms1@uke.de) von Mitarbeitern/innen der Studienzentrale in Hamburg zugesendet. Zum Schluss der Studie möchten wir noch mit einigen Teilnehmerinnen und Teilnehmern Interviews durchführen, die aufgezeichnet und verschriftlicht werden. Nach Beendigung der Studie werden die Tonaufnahmen der Interviews vernichtet. Hierzu werden Sie gesondert angesprochen und es erfolgt eine extra Einwilligung dafür.

### Wer kann teilnehmen?

Sie können an der Studie teilnehmen, wenn:

1. Bei Ihnen im letzten Jahr eine MS Verdachtsdiagnose oder definitive Diagnose einer schubförmigen MS gestellt wurde.
2. Sie seit mindestens 6 Monaten keine Immuntherapie erhalten und in den nächsten 3 Monaten keine Immuntherapie geplant ist.
3. In den letzten 4 Wochen keine Cortisontherapie erfolgte und sie nicht schwanger sind.
4. Im Kernspin des Kopfes und Rückens mindestens 2 Entzündungsherde zu sehen sind.
5. Sie einen Internetzugang und ein internetfähiges Gerät (z.B. Laptop oder Tablet) haben.
6. Sie zwischen 18 und 65 Jahre alt sind.

### Gibt es Risiken?

Risiken, jenseits der oben genannten zur Datensicherheit, liegen nicht vor.

### Was passiert, wenn ich einen Schub habe oder neue Herde im MRT erscheinen?

Im Falle eines Schubes müssen Sie Ihren behandelnden Arzt aufsuchen. Dieser wird mit Ihnen zum einen über eine Schubtherapie und zum anderen über eine MS Immuntherapie entscheiden. Genauso liegt, bei Nachweis neuer Herde im MRT, eine Immuntherapieentscheidung an. Dabei kann die Entscheidung auch vertagt werden oder auch eine Entscheidung gegen eine Therapie gefällt werden. Direkt nach diesem Entscheidungsgespräch erfolgt, arzt- und patientenseitig, eine Bewertung. Zusätzlich möchten wir in diesem Fall aus der Studienzentrale eine kurze telefonische Befragung, innerhalb von 4 Wochen, mit Ihnen durchführen.

### Was passiert mit meinen Daten?

Ihre Kontaktdaten werden an die Studienzentrale in Hamburg übermittelt. Ihre E-Mail-Adresse und Mobilfunknummer werden im Programm POWER@MS1 hinterlegt. Das Programm erinnert Sie regelmäßig, wenn neue Materialien für Sie bereit liegen. Dieser Kontakt erfolgt primär per E-Mail oder SMS. Ferner kann es sein, dass Sie kurze Verhaltenstipps per E-Mail oder SMS erhalten. Aus Datenschutzgründen sind E-Mail-Absender über das Programm so allgemein gehalten, dass nicht auf die MS rückgeschlossen werden kann. Hier müssen Sie darauf achten, dass die Nachrichten nicht im Spam-Ordner verschwinden. Zusätzlich kann es sein, dass Sie über die Studien-E-Mail (powerms1@uke.de) von Mitarbeitern/innen der Studien-



zentrale in Hamburg kontaktiert werden, mit der Bitte, bestimmte Studienfragen zu beantworten. Alle Patientendaten werden bis zum Studienende pseudonymisiert in einer Datenbank des deutschen MS-Registers gesammelt. Parallel dazu werden die Kernspindaten in Hamburg pseudonymisiert ausgewertet. Beide Datenbanken werden am Studienende verbunden und zusammen ausgewertet.

Zusätzlich werden die Zugriffszeiten auf der Studienwebsite erfasst, sodass wir abschätzen können, wie intensiv Sie sich mit den Materialien befasst haben. Diese Daten werden, wie alle anderen Daten, pseudonymisiert ausgewertet.

Nach Abschluss der Auswertung werden die Daten (inklusive Audiodaten) in Hamburg am INIMS auf einem geschützten Computer, über einen Zeitraum von 10 Jahren, sicher gelagert und anschließend vernichtet. Mit Ihrer Einwilligung werden darüber hinaus Ihre MS-bezogenen Daten in der Forschungsplattform des MS-Registers gespeichert (siehe Extraceinwilligung MS-Register). Ihre Einwilligung und die Teilnahme Ihres Zentrums am MS-Register vorausgesetzt, werden Ihre Daten gemeinsam mit dem Gesamtdatenbestand des MS-Registers, entsprechend Ihrer Einwilligung, ausgewertet. Die Daten können darüber hinaus der wissenschaftlichen Öffentlichkeit zugänglich gemacht werden, damit unsere Ergebnisse überprüft und gegebenenfalls auch mit anderen Ergebnissen verglichen werden können. Dazu werden die Daten anonymisiert, sodass keine Identifizierung mehr möglich ist. Stimmen Sie im Falle des Widerrufs Ihrer Einwilligungserklärung einer Weiterverwendung Ihrer sicher anonymisierten Daten nicht zu, ist eine Teilnahme an der Studie nicht möglich.

### **Teilnahme, Haftung, Versicherung, Aufwandsentschädigung**

Die Teilnahme an der Studie ist freiwillig. Sie können Ihre Einwilligung jederzeit und ohne Angabe von Gründen widerrufen, ohne dass dadurch Nachteile für Sie entstehen.

Da es sich nicht um eine Studie zur Prüfung eines neuen Arzneimittels oder Medizinproduktes oder eines neuen Anwendungsgebietes handelt, ist keine besondere Studienversicherung (Probandenversicherung) zur Gefährdungshaftung vorgesehen. Es gelten die allgemeinen Haftungsgrundsätze.

Die wissenschaftliche Leitung hat Prof. Dr. med. Christoph Heesen (Telefon: 040-7410-53776). Die Studienkordinatorin ist Nicole Krause (Telefon: 040-7410-54077). Sollten Sie noch weitere Fragen haben, stehen Ihnen der Versuchsleiter und die Studienkordinatorin zur Beantwortung gerne zur Verfügung.

Für die Teilnahme an dieser Studie können keinerlei finanzielle Aufwandsentschädigungen gewährt werden.

***Wir würden uns sehr freuen, wenn Sie dieses Projekt durch Ihre Teilnahme unterstützen.***

*Mit freundlichen Grüßen*

Prof. Dr. med. Christoph Heesen

Nicole Krause



## Datenschutzerklärung

Die erhobenen Daten unterliegen der Schweigepflicht und den datenschutzgesetzlichen Bestimmungen. Die Daten werden ausschließlich für wissenschaftliche Zwecke verwendet. Zugriff auf diese Daten haben die Projektleiter/Innen. Die Datenauswertung erfolgt durch Prof. Dr. Heesen und seine explizit autorisierten Mitarbeiter ohne Bezug zu den persönlichen Daten der Studienteilnehmer. Die in den Studien erhobenen Daten werden in pseudonymisierter<sup>1</sup> Form ausgewertet und für die Dauer von 10 Jahren gespeichert. Bei der Pseudonymisierung wird dem richtigen Namen ein Pseudonym (also ein Nummern- und Buchstabencode, z.B. A01, B01) zugeordnet. In den Dokumenten wird nur auf das Pseudonym und nicht auf den Namen verwiesen, sodass personenbezogene Daten nicht oder nur durch einen unverhältnismäßig großen Aufwand einer bestimmten Person zugeordnet werden können. Die personenbezogenen Daten sind gegen unbefugten Zugriff gesichert. Nach Beendigung der Studie werden die Tonaufnahmen der Interviews vernichtet. Ein individueller Widerruf der Erlaubnis zur Verwendung Ihrer Daten ist jederzeit möglich.

Eine Weitergabe der erhobenen Daten im Rahmen der Studie erfolgt nur in anonymisierter<sup>2</sup> Form. Die beteiligten Personen sind zur Verschwiegenheit verpflichtet. Gleiches gilt für die Veröffentlichung der Studienergebnisse.

Die Studienteilnehmer/innen haben das Recht, über die von Ihnen erhobenen personenbezogenen Daten Auskunft zu verlangen und über möglicherweise anfallende personenbezogene Ergebnisse der Studie ggf. informiert zu werden.

Diese Studie ist auch durch die zuständige Ethik-Kommission der Ärztekammer Hamburg beraten worden. Der zuständigen Landesbehörde kann ggf. Einsichtnahme in die Studienunterlagen gewährt werden. Im Falle des Widerrufs Ihrer Einwilligungserklärung werden die bereits erhobenen anonymisiert<sup>2</sup> und in dieser Form weiter genutzt.

---

<sup>1</sup> Pseudonymisieren ist das Ersetzen des Namens und anderer Identifikationsmerkmale durch ein Kennzeichen zu dem Zweck, die Identifizierung des Betroffenen auszuschließen oder wesentlich zu erschweren (§ 3 Abs. 6a Bundesdatenschutzgesetz).

<sup>2</sup> Anonymisieren ist das Verändern personenbezogener Daten derart, dass die Einzelangaben über persönliche oder sachliche Verhältnisse nicht mehr oder nur mit einem unverhältnismäßig großen Aufwand an Zeit, Kosten und Arbeitskraft einer bestimmten oder bestimmbar natürlichen Person zugeordnet werden können (§ 3 Abs. 6 Bundesdatenschutzgesetz).



### **Ergänzende Information für Studienteilnehmer gemäß Europäischer Datenschutz-Grundverordnung<sup>3</sup>:**

**Hiermit informieren wir Sie über die in der DSGVO festgelegten Rechte** (Artikel 12 ff. DSGVO):

**Rechtsgrundlage:** Die Rechtsgrundlage zur Verarbeitung der Sie betreffenden personenbezogenen Daten bildet bei klinischen Studien Ihre freiwillige schriftliche Einwilligung gemäß DSGVO sowie der Deklaration von Helsinki (Erklärung des Weltärztebundes zu den ethischen Grundsätzen für die medizinische Forschung am Menschen) und der Leitlinie für Gute Klinische Praxis. Zeitgleich mit der DSGVO tritt in Deutschland das überarbeitete Bundesdatenschutzgesetz (BDSG-neu) in Kraft.

**Für die Datenverarbeitung verantwortliche Person:** Der Studienleiter des Universitätsklinikums Hamburg-Eppendorf: **Prof. Dr. Christoph Heesen**

**Recht auf Auskunft:** Sie haben das Recht auf Auskunft über die Sie betreffenden personenbezogenen Daten, die im Rahmen der klinischen Studie erhoben, verarbeitet oder ggf. an Dritte übermittelt werden (Aushändigen einer kostenfreien Kopie) (Artikel 15 DSGVO, §34 BDSG-neu).

**Recht auf Berichtigung:** Sie haben das Recht, Sie betreffende unrichtige personenbezogene Daten berichtigen zu lassen (Artikel 16 und 19 DSGVO).

**Recht auf Löschung:** Sie haben das Recht auf Löschung Sie betreffender personenbezogener Daten, z. B. wenn diese Daten für den Zweck, für den sie erhoben wurden, nicht mehr notwendig sind (Artikel 17 und 19 DSGVO, §35 BDSG-neu).

**Recht auf Einschränkung der Verarbeitung:** Unter bestimmten Voraussetzungen haben Sie das Recht, eine Einschränkung der Verarbeitung zu verlangen, d.h. die Daten dürfen nur gespeichert, aber nicht verarbeitet werden. Dies müssen Sie beantragen. Wenden Sie sich hierzu bitte an Ihren Studienleiter oder an den Datenschutzbeauftragten des Prüfzentrums (Artikel 18 und 19 DSGVO).

**Recht auf Datenübertragbarkeit:** Sie haben das Recht, die Sie betreffenden personenbezogenen Daten, die Sie dem Verantwortlichen für die klinische Studie bereitgestellt haben, zu erhalten. Damit können Sie beantragen, dass diese Daten entweder Ihnen oder, soweit technisch möglich, einer anderen von Ihnen benannten Stelle übermittelt werden (Artikel 20 DSGVO).

**Widerspruchsrecht:** Sie haben das Recht, jederzeit gegen konkrete Entscheidungen oder Maßnahmen zur Verarbeitung der Sie betreffenden personenbezogenen Daten Widerspruch einzulegen (Art 21 DSGVO, § 36BDSG-neu). Eine solche Verarbeitung findet anschließend grundsätzlich nicht mehr statt.

**Einwilligung zur Verarbeitung personenbezogener Daten und Recht auf Widerruf dieser Einwilligung:** Die Verarbeitung Ihrer personenbezogenen Daten ist nur mit Ihrer Einwilligung rechtmäßig (Artikel 6 DSGVO). Sie haben das Recht, Ihre Einwilligung zur Verarbeitung personenbezogener Daten jederzeit zu widerrufen. Im Falle des Widerrufs müssen Ihre personenbezogenen Daten grundsätzlich gelöscht werden (Artikel 7, Absatz 3 DSGVO). Es gibt allerdings Ausnahmen, nach denen die bis zum Zeitpunkt des Widerrufs erhobenen Daten

---

<sup>3</sup> Verordnung (EU) 2016/679 des Europäischen Parlaments und des Rates vom 27. April 2016 zum Schutz natürlicher Personen bei der Verarbeitung personenbezogener Daten, zum freien Datenverkehr und zur Aufhebung der Richtlinie 95/46/EG (Datenschutz-Grundverordnung)



weiter verarbeitet werden dürfen, z.B. wenn die weitere Datenverarbeitung zur Erfüllung einer rechtlichen Verpflichtung erforderlich ist (Art. 17 Abs. 3 b DSGVO).

**Möchten Sie eines dieser Rechte in Anspruch nehmen, wenden Sie sich bitte an den Studienleiter Ihres Prüfzentrums.**

Außerdem haben Sie das **Recht, Beschwerde bei einer Aufsichtsbehörde/n einzulegen**, wenn Sie der Ansicht sind, dass die Verarbeitung der Sie betreffenden personenbezogenen Daten gegen die DSGVO verstößt. Wenn Sie Bedenken hinsichtlich des Umgangs mit Ihren personenbezogenen Daten haben, können Sie sich an die für Sie zuständige Datenschutzbehörde wenden:

**Die für das UKE beauftragte Behörde**

Datenschutzbeauftragter des  
Universitätsklinikums Hamburg-Eppendorf

Matthias Jaster

Martinstraße 52  
20246 Hamburg  
040 / 7410 - 56890

m.jaster@uke.de

**Datenschutz-Aufsichtsbehörde**

Hamburgische Beauftragte für  
Datenschutz und Informationsfreiheit

Ludwig-Erhard-Str. 22  
20459 Hamburg  
040 / 42854 - 4040

mailbox@datenschutz.hamburg.de



## Einwilligungserklärung zur Teilnahme an der Studie POWER@MS1

Teilnehmer, Teilnehmerin (Name in Druckbuchstaben):

.....

### **Bitte ankreuzen und unterschreiben**

Hiermit willige ich zur freiwilligen Teilnahme an der Studie ein.

Ich wurde mündlich ausführlich und verständlich über das Anliegen, die Bedeutung und die Tragweite der Studie aufgeklärt. Das Informationsschreiben zur Studie und zum Umgang mit den erfassten Daten habe ich gelesen und verstanden. Meine Fragen zur Studie wurden erläutert und beantwortet.

Zur Einwilligung hatte ich ausreichend Zeit. Meine Teilnahme ist freiwillig und kann jederzeit ohne Angaben von Gründen widerrufen werden, ohne dass für mich Nachteile entstehen. Ich habe keinerlei Kosten oder finanziellen Nutzen durch die Teilnahme an dieser Studie. Es gelten die Richtlinien des Datenschutzes.

Eine Kopie der Einwilligungserklärung habe ich erhalten und erkläre hiermit meine freiwillige Teilnahme an dieser Studie.

Ort, Datum

Unterschrift des Teilnehmers / der Teilnehmerin

.....

.....

Ort, Datum

Unterschrift des Arztes

.....

.....
